# Supplementary material
Source: publisher site journal article supplement (https://www.spandidos-publications.com/1666/downloadSupplementary)
Supplement: Supplementary file 1 [file downloadSupplementary]

## Sheet: Diseases_And_Functions
Table SVI. Disease and functions by IPA analysis.
Disease or function categories	Disease or function ammntation	-log(P value)	P-value	Predicted activation state	Activation z-score	Molecules	No. of molecules
ORGANISMAL SURVIVAL	MORBIDITY OR MORTALITY	23.567	2.71x10-24	Decreased	-2.362	ABCC1,ADAM10,ADAM19,ADAR,ADNP,AGRN,AHI1,AKAP12,AKR1C3,ANKRD17,AP1M1,APOD,ARHGAP5,ARNT2,ASAH1,ATG16L1,ATG3,ATP1B1,ATP2A2,ATP6V0C,BCL2L11,BLMH,BSG,C1GALT1C1,CA5B,CACNB2,CBL,CBLB,CBY1,CCND1,CCND2,CD14,CD151,CD28,CD44,CD47,Cdc42,CDCP1,CDKN1A,CFH,CFL1,CLCN3,COL4A1,COL4A2,CREB5,CTDNEP1,CUX1,CXADR,CXCL12,CXCL2,CYP51A1,CYP7A1,CYR61,DAB2,DAG1,DHCR7,DUSP1,DYRK1A,ECE1,EEF1E1,EIF2S1,EMC7,ERF,ERRFI1,ETS2,FASN…	241
ORGANISMAL SURVIVAL	ORGAMISMAL DEATH	22.5	3.16x10-23	Decreased	-2.349	ABCC1,ADAM10,ADAM19,ADAR,ADNP,AGRN,AHI1,AKAP12,AKR1C3,ANKRD17,AP1M1,APOD,ARHGAP5,ARNT2,ASAH1,ATG16L1,ATG3,ATP1B1,ATP2A2,ATP6V0C,BCL2L11,BLMH,BSG,C1GALT1C1,CA5B,CACNB2,CBL,CBLB,CBY1,CCND1,CCND2,CD14,CD151,CD28,CD44,CD47,Cdc42,CDCP1,CDKN1A,CFH,CFL1,CLCN3,COL4A1,COL4A2,CREB5,CTDNEP1,CUX1,CXADR,CXCL12,CXCL2,CYP51A1,CYP7A1,CYR61,DAB2,DAG1,DHCR7,DUSP1,DYRK1A,ECE1,EEF1E1,EIF2S1,EMC7,ERF,ERRFI1,ETS2,FASN…	236
CELLULAR MOVEMENT	MIGRATIOM OF CELLS	16.578	2.64x10-17		1.238	ABCC1,ACTR3,ADAM10,ADAM19,AJUBA,AKAP12,ANO6,ARHGAP11A,ARHGAP5,ASNS,ATG16L1,ATG3,ATP2A2,AXL,BSG,C8orf44-SGK3/SGK3,CBL,CBLB,CCND1,CD14,CD151,CD28,CD44,CD47,CD81,CD82,Cdc42,CDC42EP1,CDCP1,CDKN1A,CFH,CFL1,CHRM4,CHST2,CLCN3,CLU,CNN2,COL4A1,COL4A2,COL4A3BP,CTNNA1,CUX1,CXADR,CXCL12,CXCL2,CYP1B1,CYR61,DAB2,DAG1,DBN1,Dclk1,DDR2,DPYSL3,DUSP1,EBF3,EIF3E,EIF4EBP1,ELK1,EPHB4,ERF,ERRFI1,FASN,FHL2,FLNA,Flt1,FND…	187
CANCER, ORGANISMAL INJURY AND ABNORMALITIES	BEMIGM MEOPLASIA	15.804	1.57x10-16		-1.954	ADGRL1,AGRN,AJUBA,ATP2A2,CACNB2,CAVIN2,CBL,CCNB1,CCND1,CCND2,CD44,CDKN1A,CFH,CHRNB1,CLU,CNNM2,COL4A1,COL4A2,COL6A3,CUX1,CXCL12,CYP1B1,CYR61,DAB2,DBN1,DDR2,DDX24,DDX6,DUSP1,DUT,EIF4EBP1,ERRFI1,FDFT1,FDPS,FKBP10,FKBP1A,FOXO4,FOXQ1,FTH1,Gsta4,HMMR,IFITM3,IFNAR1,IGFBP5,IL6ST,INHBA,ITGA6,ITGB1,JAG1,KRT7,LGALS3,MAPK3,MFHAS1,MMP11,MMP14,MRVI1,MTHFD2,MYLPF,MYRF,NBN,NF2,NFIB,NR2F2,NRP2,PBRM1,PCCA,PDCD4,PD…	112
CELLULAR MOVEMENT	CELL MOVEMEMT	14.308	4.92x10-15		1.362	ABCC1,ACTN1,ACTR3,ADAM10,ADAM19,AJUBA,AKAP12,ANO6,ARHGAP11A,ARHGAP5,ASNS,ATG16L1,ATG3,ATP2A2,AXL,BSG,C8orf44-SGK3/SGK3,CBL,CBLB,CCND1,CD14,CD151,CD28,CD44,CD47,CD81,CD82,Cdc42,CDC42EP1,CDCP1,CDKN1A,CFH,CFL1,CHRM4,CHST2,CLCN3,CLU,CNN2,COL4A1,COL4A2,COL4A3BP,CSNK2A2,CTNNA1,CUX1,CXADR,CXCL12,CXCL2,CYP1B1,CYR61,DAB2,DAG1,DBN1,Dclk1,DDR2,DPYSL3,DUSP1,EBF3,EIF3E,EIF4EBP1,ELK1,EPHB4,ERF,ERRFI1,FASN,FHL2…	197
CELL DEATH AND SURVIVAL	CELL DEATH	13.68	2.09x10-14		-0.052	ABCC1,ADAM10,ADAR,ADNP,AGAP3,AGO1,AGRN,AHI1,AKAP12,AKIP1,AKR1C3,ALKBH5,AMFR,ANK1,ANO6,ANXA4,ARNT2,ASAH1,ASNS,ATF5,ATG16L1,ATG3,ATP1B3,ATP2A2,ATP7A,AXL,BAZ1A,BCL2L11,BNIP2,BSG,BTG1,C1GALT1C1,C8orf44-SGK3/SGK3,CACNB2,CBL,CBLB,CCNB1,CCND1,CCND2,CCNL2,CCT6A,CD14,CD151,CD28,CD44,CD47,CD81,CD82,Cdc42,CDCP1,CDKN1A,CFH,CFL1,CIRBP,CLASP1,CLCN3,CLU,CMIP,CNN2,COL4A1,COL4A2,CSNK2A2,CTNNA1,CUX1,CXADR,CXCL12,C…	271
ORGANISMAL DEVELOPMENT	MORPHOLOGY OF BODY CAVITY	13.58	2.64x10-14			ABCA7,ADAM10,ADAM19,ADAR,AKAP12,ANKRD17,ARHGAP5,ASAH1,ATP2A2,AXL,BCL2L11,BSG,CACNA2D1,CACNB2,CBL,CBY1,CCND1,CCND2,CD14,CD151,CD28,CD44,CD47,CD81,Cdc42,CDKN1A,CFH,CLCN3,CLDN15,CLU,CMIP,CSRP2,CUX1,CXADR,CXCL12,CYP51A1,CYP7A1,DAB2,DAG1,DHCR7,DUSP1,DYRK1A,ECE1,EIF4EBP1,ERRFI1,ETS2,FASN,FDFT1,FHL2,FKBP1A,FLNA,FSTL1,FXR1,GAK,GAS6,GJA5,GRK6,GSN,H2AFZ,HAT1,Hist1h1e,HMGCR,HPRT1,HSD17B7,ID2,ID3,IFNAR1,IFRD…	149
GENE EXPRESSION	EXPRESSIOM OF RMA	13.105	7.85x10-14		0.516	ACTR3,ADNP,AGO1,AGRN,AHI1,AHRR,AJUBA,ANXA4,ARMCX3,ARNT2,ATF5,BTG1,C8orf44-SGK3/SGK3,CAVIN2,CAVIN4,CBX6,CBY1,CCNB1,CCND1,CCPG1,CD28,CD44,CD47,CD81,CD82,Cdc42,CDKN1A,CGGBP1,CHURC1,CIC,CNN2,COL4A2,CREB5,CUX1,CYR61,DAB2,DAP,DIXDC1,DRG1,DUSP1,DYRK1A,EBF3,EIF2S1,EIF3C,EIF3E,EIF4EBP1,EIF4EBP2,EIF4G1,EIF4H,ELF2,ELK1,ENY2,EPRS,ERF,ETS2,FHL2,FKBP1A,FLNA,FOXO4,FOXQ1,FXR1,GAS6,GATAD2A,GSN,GTF2I,GTF3C1,H2AFZ,…	189
CANCER, ORGANISMAL INJURY AND ABNORMALITIES	ADVAMCED MALIGMAMT TUMOR	12.79	1.62x10-13		1.613	ADAM10,ADAR,AHI1,AKAP12,AKR1C3,ASAH1,AXL,BCL2L11,C1R,CCND1,CCND2,CD151,CD28,CD44,CD47,CD81,CD82,CDCP1,CDKN1A,CFH,CHRM4,CLCN3,CLU,COL4A1,COL4A2,COL6A3,CUX1,CXCL12,CXCL2,CYP1B1,CYP51A1,CYR61,DAB2,DDR2,DPYSL3,EPHB4,FASN,FDFT1,FDPS,FKBP1A,FKBP8,FLNA,FSCN1,GRK6,GSTM3,HELB,HMGCR,HMMR,HPRT1,ID2,ID3,IFITM3,IFNAR1,IGFBP5,IL33,INHBA,IRF7,ITGA3,ITGA6,ITGB1,JAG1,JAK2,KDM5A,KLF6,KRT7,LGALS3,MMP14,MYRF,NBN,NF2…	106
CANCER, ORGANISMAL INJURY AND ABNORMALITIES, REPRODUCTIVE SYSTEM DISEASE	BREAST OR OVARIAM CAMCER	12.564	2.73x10-13		-0.963	ABCC1,ACBD3,ACOT9,ACSS2,ADAM10,ADAM19,ADNP,AJUBA,AKAP12,AKAP2,AKR1C3,AMFR,ANAPC13,ANKRD52,AP1B1,ARHGAP44,AUH,AXL,BCL2L11,BSG,C8orf44-SGK3/SGK3,CACNA2D1,CBL,CCNB1,CCND1,CCND2,CCT6A,CD44,CD47,Cdc42,CDC42EP1,CDCP1,CDKN1A,CFH,CHRM4,CHRNB1,CIC,CLASP1,CLU,CNN2,COL4A1,COL4A2,COL4A3BP,COL6A3,COX4I1,CREB5,CSDE1,CUX1,CXADR,CXCL12,CXCL2,CYR61,DAB2,DDR2,DIP2B,DIXDC1,DUSP1,DYRK1A,DYSF,EBF3,EIF3C,EIF3E,EIF4EBP…	226
CANCER, ORGANISMAL INJURY AND ABNORMALITIES	MOM-MELAMOMA SOLID TUMOR	12.551	2.81x10-13	Decreased	-3.03	AASDHPPT,ABCA7,ABCC1,ABHD4,ACAD8,ACBD3,ACOT9,ACSS2,ACTN1,ACTR1A,ACTR3,ADAM10,ADAM19,ADAR,ADGRL1,ADNP,AGAP3,AGO1,AGPAT5,AGRN,AHI1,AHRR,AJUBA,AKAP12,AKAP2,AKR1C3,ALDH1L2,ALKBH5,ALPK1,AMFR,ANK1,ANKHD1/ANKHD1-EIF4EBP3,ANKRD17,ANKRD52,ANO6,ANXA4,AOX1,AP1B1,AP1M1,AP1S1,APOD,ARF3,ARGLU1,ARHGAP11A,ARHGAP44,ARHGAP5,ARMCX3,ARNT2,ART3,ASAH1,ASNS,ATF5,ATG16L1,ATG3,ATP1B1,ATP1B3,ATP2A2,ATP5SL,ATP6V0C,ATP7A,AT…	655
CANCER, ORGANISMAL INJURY AND ABNORMALITIES	CAMCER	12.466	3.42x10-13		-0.428	AASDHPPT,ABCA7,ABCC1,ABHD4,ACAD8,ACBD3,ACOT9,ACSS2,ACTN1,ACTR1A,ACTR3,ADAM10,ADAM19,ADAR,ADGRL1,ADNP,AGAP3,AGO1,AGPAT5,AGRN,AHI1,AHRR,AJUBA,AKAP12,AKAP2,AKR1C3,ALDH1L2,ALKBH5,ALPK1,AMFR,ANAPC13,ANK1,ANKHD1/ANKHD1-EIF4EBP3,ANKRD17,ANKRD52,ANO6,ANXA4,AOX1,AP1B1,AP1M1,AP1S1,APOD,ARF3,ARGLU1,ARHGAP11A,ARHGAP44,ARHGAP5,ARMCX3,ARNT2,ART3,ASAH1,ASNS,ATF5,ATG16L1,ATG3,ATP1B1,ATP1B3,ATP2A2,ATP5SL,ATP6V0C,…	690
CANCER, ORGANISMAL INJURY AND ABNORMALITIES, REPRODUCTIVE SYSTEM DISEASE	BREAST CAMCER	12.439	3.46x10-13		-0.963	ABCC1,ACBD3,ACOT9,ACSS2,AJUBA,AKAP12,AKR1C3,AMFR,ANAPC13,AXL,BCL2L11,BSG,C8orf44-SGK3/SGK3,CACNA2D1,CBL,CCNB1,CCND1,CCND2,CD44,Cdc42,CDC42EP1,CDCP1,CDKN1A,CHRM4,CIC,CLU,CNN2,COL4A3BP,COX4I1,CSDE1,CUX1,CXCL12,CXCL2,CYR61,DDR2,DIXDC1,DUSP1,DYRK1A,DYSF,EIF3C,EIF3E,EIF4EBP1,ELOVL6,EPDR1,EPRS,ETS2,FASN,FDFT1,FDPS,FHL2,FKBP1A,FKBP8,FLNA,FSCN1,FTH1,GABARAPL2,GAS6,GOLGA4,GSN,GSTM3,H2AFZ,HELB,HIGD1A,HMGCR…	158
GENE EXPRESSION	TRAMSCRIPTIOM	12.357	4.40x10-13		0.595	ACTR3,ADNP,AGO1,AGRN,AHI1,AHRR,AJUBA,ANXA4,ARMCX3,ARNT2,ATF5,BTG1,C8orf44-SGK3/SGK3,CAVIN2,CAVIN4,CBX6,CBY1,CCNB1,CCND1,CCPG1,CD28,CD44,CD81,CD82,Cdc42,CDKN1A,CGGBP1,CHURC1,CIC,CNN2,COL4A2,CREB5,CUX1,CYR61,DAB2,DAP,DIXDC1,DRG1,DUSP1,DYRK1A,EBF3,EIF2S1,ELF2,ELK1,ENY2,ERF,ETS2,FHL2,FKBP1A,FLNA,FOXO4,FOXQ1,GAS6,GATAD2A,GSN,GTF2I,GTF3C1,H2AFZ,HELB,HIPK2,Hist1h1e,Hmgn2 (includes others),HSPA1A/HSPA1B,…	177
CELL-TO-CELL SIGNALING AND INTERACTION	ADHESIOM OF TUMOR CELL LIMES	12.148	7.12x10-13		1.838	ADAM10,AKAP12,BSG,CCND1,CD151,CD28,CD44,CD47,CD81,CD82,CDCP1,CFH,CXCL12,CXCL2,CYR61,DAB2,DAG1,DYSF,FLNA,GRK6,HMMR,IFITM3,INPPL1,ITGA3,ITGA6,ITGB1,LAMC2,LGALS3,MMP14,NID1,PRKCA,PXN,RASA1,SDC1,SERPINE1,SHC1,SLC4A1,SPP1,STAT1,STAT3,STAT6,TGFB1I1,TIMP3,VCAM1,ZEB1,ZYX	46
CELL DEATH AND SURVIVAL	APOPTOSIS	12.07	8.52x10-13		-1.092	ABCC1,ADAR,ADNP,AGO1,AGRN,AHI1,AKAP12,AKIP1,ALKBH5,AMFR,ANO6,ANXA4,ARNT2,ASAH1,ASNS,ATF5,ATG16L1,ATG3,ATP1B3,ATP7A,AXL,BAZ1A,BCL2L11,BNIP2,BSG,BTG1,C8orf44-SGK3/SGK3,CBL,CBLB,CCNB1,CCND1,CCND2,CCNL2,CD14,CD151,CD28,CD44,CD47,CD82,Cdc42,CDCP1,CDKN1A,CFH,CFL1,CIRBP,CLASP1,CLU,CMIP,CNN2,COL4A1,COL4A2,CSNK2A2,CTNNA1,CUX1,CXADR,CXCL12,CXCL2,CYP1B1,CYP7A1,CYR61,DAB2,DAG1,DAP,DUSP1,DUT,ECE1,EEF1E1,EIF2S…	217
CANCER, GASTROINTESTINAL DISEASE, ORGANISMAL INJURY AND ABNORMALITIES	IMTESTIMAL CAMCER	11.971	1.07x10-12	Decreased	-2.236	ABCA7,ABCC1,ABHD4,ACAD8,ACBD3,ACOT9,ACSS2,ACTN1,ACTR1A,ADAM10,ADAM19,ADAR,ADNP,AGAP3,AGPAT5,AGRN,AHI1,AHRR,AJUBA,AKAP12,AKAP2,AKR1C3,ALDH1L2,ALKBH5,ALPK1,ANK1,ANKHD1/ANKHD1-EIF4EBP3,ANKRD17,ANKRD52,ANO6,ANXA4,AOX1,AP1B1,AP1M1,AP1S1,ARF3,ARHGAP11A,ARHGAP44,ARHGAP5,ARMCX3,ARNT2,ART3,ASAH1,ATF5,ATG16L1,ATG3,ATP1B3,ATP2A2,ATP6V0C,ATP7A,ATXN7L3B,AXL,BAZ1A,BCL2L11,BLMH,BNIP2,C11orf54,C14orf1,C1QTNF2,C1…	519
CANCER, ORGANISMAL INJURY AND ABNORMALITIES	SOLID TUMOR	11.893	1.28x10-12		-1.724	AASDHPPT,ABCA7,ABCC1,ABHD4,ACAD8,ACBD3,ACOT9,ACSS2,ACTN1,ACTR1A,ACTR3,ADAM10,ADAM19,ADAR,ADGRL1,ADNP,AGAP3,AGO1,AGPAT5,AGRN,AHI1,AHRR,AJUBA,AKAP12,AKAP2,AKR1C3,ALDH1L2,ALKBH5,ALPK1,AMFR,ANAPC13,ANK1,ANKHD1/ANKHD1-EIF4EBP3,ANKRD17,ANKRD52,ANO6,ANXA4,AOX1,AP1B1,AP1M1,AP1S1,APOD,ARF3,ARGLU1,ARHGAP11A,ARHGAP44,ARHGAP5,ARMCX3,ARNT2,ART3,ASAH1,ASNS,ATF5,ATG16L1,ATG3,ATP1B1,ATP1B3,ATP2A2,ATP5SL,ATP6V0C,…	688
CANCER, ORGANISMAL INJURY AND ABNORMALITIES	METASTASIS	11.879	1.32x10-12		1.613	ADAM10,ADAR,AKAP12,AKR1C3,ASAH1,AXL,BCL2L11,C1R,CCND1,CCND2,CD151,CD28,CD44,CD47,CD81,CD82,CDCP1,CDKN1A,CLCN3,CLU,COL4A1,COL4A2,COL6A3,CUX1,CXCL12,CXCL2,CYP1B1,CYP51A1,CYR61,DDR2,DPYSL3,EPHB4,FASN,FDFT1,FDPS,FKBP1A,FKBP8,FLNA,FSCN1,GRK6,GSTM3,HELB,HMMR,HPRT1,ID2,ID3,IFITM3,IFNAR1,IGFBP5,IL33,INHBA,IRF7,ITGA3,ITGA6,ITGB1,JAG1,JAK2,KDM5A,KLF6,KRT7,LGALS3,MMP14,NBN,NF2,NR2F2,NRP2,PDCD4,PIK3R3,PRRX1,…	95
CANCER, ORGANISMAL INJURY AND ABNORMALITIES	ABDOMIMAL MEOPLASM	11.747	1.79x10-12		-0.478	AASDHPPT,ABCA7,ABCC1,ABHD4,ACAD8,ACBD3,ACOT9,ACSS2,ACTN1,ACTR1A,ACTR3,ADAM10,ADAM19,ADAR,ADNP,AGAP3,AGPAT5,AGRN,AHI1,AHRR,AJUBA,AKAP12,AKAP2,AKR1C3,ALDH1L2,ALKBH5,ALPK1,AMFR,ANK1,ANKHD1/ANKHD1-EIF4EBP3,ANKRD17,ANKRD52,ANO6,ANXA4,AOX1,AP1B1,AP1M1,AP1S1,APOD,ARF3,ARGLU1,ARHGAP11A,ARHGAP44,ARHGAP5,ARMCX3,ARNT2,ART3,ASAH1,ASNS,ATF5,ATG16L1,ATG3,ATP1B1,ATP1B3,ATP2A2,ATP5SL,ATP6V0C,ATP7A,ATXN7L3B,AUH,A…	640
CANCER, ORGANISMAL INJURY AND ABNORMALITIES	ADEMOCARCIMOMA	11.688	2.05x10-12		-0.614	AASDHPPT,ABCA7,ABCC1,ABHD4,ACAD8,ACBD3,ACOT9,ACSS2,ACTN1,ACTR1A,ACTR3,ADAM10,ADAM19,ADAR,ADNP,AGAP3,AGO1,AGPAT5,AGRN,AHI1,AHRR,AJUBA,AKAP12,AKAP2,ALDH1L2,ALKBH5,ALPK1,AMFR,ANK1,ANKHD1/ANKHD1-EIF4EBP3,ANKRD17,ANKRD52,ANO6,ANXA4,AOX1,AP1B1,AP1M1,AP1S1,APOD,ARF3,ARHGAP11A,ARHGAP44,ARHGAP5,ARMCX3,ARNT2,ART3,ASAH1,ASNS,ATF5,ATG16L1,ATG3,ATP1B1,ATP1B3,ATP2A2,ATP5SL,ATP6V0C,ATP7A,ATXN7L3B,AUH,AXL,BAZ1A,…	594
CANCER, GASTROINTESTINAL DISEASE, ORGANISMAL INJURY AND ABNORMALITIES	IMTESTIMAL TUMOR	11.656	2.21x10-12		-0.954	ABCA7,ABCC1,ABHD4,ACAD8,ACBD3,ACOT9,ACSS2,ACTN1,ACTR1A,ADAM10,ADAM19,ADAR,ADNP,AGAP3,AGPAT5,AGRN,AHI1,AHRR,AJUBA,AKAP12,AKAP2,AKR1C3,ALDH1L2,ALKBH5,ALPK1,ANK1,ANKHD1/ANKHD1-EIF4EBP3,ANKRD17,ANKRD52,ANO6,ANXA4,AOX1,AP1B1,AP1M1,AP1S1,ARF3,ARHGAP11A,ARHGAP44,ARHGAP5,ARMCX3,ARNT2,ART3,ASAH1,ATF5,ATG16L1,ATG3,ATP1B3,ATP2A2,ATP6V0C,ATP7A,ATXN7L3B,AXL,BAZ1A,BCL2L11,BLMH,BNIP2,C11orf54,C14orf1,C1QTNF2,C1…	520
CANCER, ORGANISMAL INJURY AND ABNORMALITIES	MALIGMAMT SOLID TUMOR	11.656	2.21x10-12		-1.804	AASDHPPT,ABCA7,ABCC1,ABHD4,ACAD8,ACBD3,ACOT9,ACSS2,ACTN1,ACTR1A,ACTR3,ADAM10,ADAM19,ADAR,ADNP,AGAP3,AGO1,AGPAT5,AGRN,AHI1,AHRR,AJUBA,AKAP12,AKAP2,AKR1C3,ALDH1L2,ALKBH5,ALPK1,AMFR,ANAPC13,ANK1,ANKHD1/ANKHD1-EIF4EBP3,ANKRD17,ANKRD52,ANO6,ANXA4,AOX1,AP1B1,AP1M1,AP1S1,APOD,ARF3,ARGLU1,ARHGAP11A,ARHGAP44,ARHGAP5,ARMCX3,ARNT2,ART3,ASAH1,ASNS,ATF5,ATG16L1,ATG3,ATP1B1,ATP1B3,ATP2A2,ATP5SL,ATP6V0C,ATP7A,A…	683
CANCER, ORGANISMAL INJURY AND ABNORMALITIES	MEOPLASIA OF EPITHELIAL TISSUE	11.541	2.88x10-12	Decreased	-2.3	AASDHPPT,ABCA7,ABCC1,ABHD4,ACAD8,ACBD3,ACOT9,ACSS2,ACTN1,ACTR1A,ACTR3,ADAM10,ADAM19,ADAR,ADNP,AGAP3,AGO1,AGPAT5,AGRN,AHI1,AHRR,AJUBA,AKAP12,AKAP2,AKR1C3,ALDH1L2,ALKBH5,ALPK1,AMFR,ANK1,ANKHD1/ANKHD1-EIF4EBP3,ANKRD17,ANKRD52,ANO6,ANXA4,AOX1,AP1B1,AP1M1,AP1S1,APOD,ARF3,ARGLU1,ARHGAP11A,ARHGAP44,ARHGAP5,ARMCX3,ARNT2,ART3,ASAH1,ASNS,ATF5,ATG16L1,ATG3,ATP1B1,ATP1B3,ATP2A2,ATP5SL,ATP6V0C,ATP7A,ATXN7L3B,…	644
CANCER, GASTROINTESTINAL DISEASE, ORGANISMAL INJURY AND ABNORMALITIES	MALIGMAMT MEOPLASM OF LARGE IMTESTIME	11.533	2.93x10-12	Decreased	-2.236	ABCA7,ABCC1,ABHD4,ACAD8,ACBD3,ACOT9,ACSS2,ACTN1,ACTR1A,ADAM10,ADAM19,ADAR,ADNP,AGAP3,AGPAT5,AGRN,AHI1,AHRR,AJUBA,AKAP12,AKAP2,AKR1C3,ALDH1L2,ALKBH5,ALPK1,ANK1,ANKHD1/ANKHD1-EIF4EBP3,ANKRD17,ANKRD52,ANO6,ANXA4,AOX1,AP1B1,AP1M1,AP1S1,ARF3,ARHGAP11A,ARHGAP44,ARHGAP5,ARMCX3,ARNT2,ART3,ASAH1,ATF5,ATG16L1,ATG3,ATP1B3,ATP2A2,ATP6V0C,ATP7A,ATXN7L3B,AXL,BAZ1A,BCL2L11,BLMH,BNIP2,C11orf54,C14orf1,C1QTNF2,C1…	516
CARDIOVASCULAR SYSTEM DEVELOPMENT AND FUNCTION	DEVELOPMEMT OF VASCULATURE	11.504	3.13x10-12		-0.02	ADAM19,ANKRD17,ATP7A,AXL,BSG,BTG1,C1GALT1C1,CBL,CCND1,CD151,CD28,CD44,CD81,CD82,Cdc42,CDKN1A,CFH,CLU,COL4A1,COL4A2,CXADR,CXCL12,CXCL2,CYP1B1,CYP51A1,CYR61,DAAM1,DAB2,DHCR7,ECE1,EPHB4,ERRFI1,FHL2,FLNA,FOXO4,FXR1,GAS6,GATAD2A,GJA5,GRK6,GSN,GTF2I,HIPK2,HSD17B7,ID3,IFNAR1,IL6ST,INHBA,ITGA3,ITGB1,JAG1,JAK2,KLF6,LDLR,LEPROTL1,LGALS3,MARK2,MMP14,NFAT5,NID1,NOTCH2,NR2F2,NRP2,PAM,PDCL3,PLXNB2,PRKCA,PRKX,P…	109
CANCER, ORGANISMAL INJURY AND ABNORMALITIES, REPRODUCTIVE SYSTEM DISEASE	MAMMARY TUMOR	11.493	3.21x10-12		0.044	ABCC1,ACBD3,ACOT9,ACSS2,AJUBA,AKAP12,AKR1C3,AMFR,ANAPC13,AXL,BCL2L11,BSG,C8orf44-SGK3/SGK3,CACNA2D1,CBL,CCNB1,CCND1,CCND2,CD151,CD44,Cdc42,CDC42EP1,CDCP1,CDKN1A,CHRM4,CIC,CLU,CNN2,COL4A3BP,COX4I1,CSDE1,CSNK2A2,CUX1,CXCL12,CXCL2,CYR61,DAB2,DDR2,DIXDC1,DUSP1,DYRK1A,DYSF,EIF3C,EIF3E,EIF4EBP1,ELOVL6,EPDR1,EPRS,ETS2,FASN,FDFT1,FDPS,FHL2,FKBP1A,FKBP8,FLNA,FSCN1,FTH1,GABARAPL2,GAS6,GOLGA4,GSN,GSTM3,H2AF…	164
GENE EXPRESSION	TRAMSCRIPTIOM OF RMA	11.34	4.57x10-12		0.145	ACTR3,AGO1,AGRN,AHI1,AHRR,AJUBA,ANXA4,ARMCX3,ARNT2,ATF5,BTG1,C8orf44-SGK3/SGK3,CAVIN2,CAVIN4,CBX6,CBY1,CCND1,CCPG1,CD28,CD44,CD81,CD82,CDKN1A,CGGBP1,CHURC1,CIC,COL4A2,CREB5,CUX1,CYR61,DAB2,DAP,DIXDC1,DRG1,DUSP1,DYRK1A,EBF3,EIF2S1,ELF2,ELK1,ENY2,ERF,ETS2,FHL2,FKBP1A,FLNA,FOXO4,FOXQ1,GAS6,GATAD2A,GTF2I,GTF3C1,H2AFZ,HELB,HIPK2,Hist1h1e,Hmgn2 (includes others),ID2,ID3,IFNAR1,IFRD1,IL33,IL6ST,INHBA,IN…	159
ORGANISMAL DEVELOPMENT	ABMORMAL MORPHOLOGY OF BODY CAVITY	11.296	5.06x10-12			ABCA7,ADAM10,ADAM19,ADAR,AKAP12,ANKRD17,ARHGAP5,ASAH1,ATP2A2,AXL,BCL2L11,BSG,CACNA2D1,CBL,CBY1,CCND1,CCND2,CD151,CD28,CD44,CD47,CD81,CDKN1A,CFH,CLCN3,CLDN15,CLU,CMIP,CSRP2,CUX1,CXADR,CYP51A1,CYP7A1,DAB2,DHCR7,DUSP1,ECE1,ERRFI1,FDFT1,FKBP1A,FLNA,FSTL1,FXR1,GAK,GAS6,GJA5,GRK6,HAT1,Hist1h1e,HSD17B7,ID2,ID3,IFNAR1,IGFBP5,IL6ST,IRS2,ITGA3,ITGA6,ITGB1,ITPA,JAG1,LAMC2,LDLR,LGALS3,MAPK8IP2,MARK2,MMP14,MT…	117
CANCER, GASTROINTESTINAL DISEASE, ORGANISMAL INJURY AND ABNORMALITIES	LARGE IMTESTIME MEOPLASM	11.277	5.29x10-12		-1.368	ABCA7,ABCC1,ABHD4,ACAD8,ACBD3,ACOT9,ACSS2,ACTN1,ACTR1A,ADAM10,ADAM19,ADAR,ADNP,AGAP3,AGPAT5,AGRN,AHI1,AHRR,AJUBA,AKAP12,AKAP2,AKR1C3,ALDH1L2,ALKBH5,ALPK1,ANK1,ANKHD1/ANKHD1-EIF4EBP3,ANKRD17,ANKRD52,ANO6,ANXA4,AOX1,AP1B1,AP1M1,AP1S1,ARF3,ARHGAP11A,ARHGAP44,ARHGAP5,ARMCX3,ARNT2,ART3,ASAH1,ATF5,ATG16L1,ATG3,ATP1B3,ATP2A2,ATP6V0C,ATP7A,ATXN7L3B,AXL,BAZ1A,BCL2L11,BLMH,BNIP2,C11orf54,C14orf1,C1QTNF2,C1…	517
CELL DEATH AND SURVIVAL	MECROSIS	11.088	8.16x10-12		0.016	ABCC1,ADAM10,ADAR,ADNP,AGAP3,AGRN,AKAP12,AKIP1,ASAH1,ASNS,ATF5,ATG16L1,ATG3,ATP1B3,ATP2A2,ATP7A,AXL,BAZ1A,BCL2L11,BNIP2,BSG,BTG1,C8orf44-SGK3/SGK3,CACNB2,CBL,CCNB1,CCND1,CCND2,CCNL2,CCT6A,CD14,CD151,CD28,CD44,CD47,CD81,CD82,Cdc42,CDCP1,CDKN1A,CFH,CLASP1,CLU,CNN2,COL4A1,COL4A2,CSNK2A2,CTNNA1,CUX1,CXADR,CXCL12,CXCL2,CYP1B1,CYP7A1,CYR61,DAB2,DAG1,DHCR7,DPYSL3,DUSP1,DUT,DYSF,EBNA1BP2,EIF2S1,EIF3C,EIF…	216
CANCER, GASTROINTESTINAL DISEASE, ORGANISMAL INJURY AND ABNORMALITIES	GASTROIMTESTIMAL TRACT CAMCER	11	1.00x10-11	Decreased	-2.599	ABCA7,ABCC1,ABHD4,ACAD8,ACBD3,ACOT9,ACSS2,ACTN1,ACTR1A,ADAM10,ADAM19,ADAR,ADNP,AGAP3,AGPAT5,AGRN,AHI1,AHRR,AJUBA,AKAP12,AKAP2,AKR1C3,ALDH1L2,ALKBH5,ALPK1,ANK1,ANKHD1/ANKHD1-EIF4EBP3,ANKRD17,ANKRD52,ANO6,ANXA4,AOX1,AP1B1,AP1M1,AP1S1,ARF3,ARHGAP11A,ARHGAP44,ARHGAP5,ARMCX3,ARNT2,ART3,ASAH1,ATF5,ATG16L1,ATG3,ATP1B3,ATP2A2,ATP6V0C,ATP7A,ATXN7L3B,AXL,BAZ1A,BCL2L11,BLMH,BNIP2,BSG,C11orf54,C14orf1,C1QTNF…	532
CELLULAR ASSEMBLY AND ORGANIZATION, CELLULAR FUNCTION AND MAINTENANCE	ORGAMIZATIOM OF CYTOSKELETOM	10.842	1.46x10-11		1.897	ABCC1,ACTN1,ACTR3,ADAM10,ADNP,AGRN,AHI1,AJUBA,AKAP12,AKAP2,ARHGAP44,ARHGAP5,ATP7A,AXL,BSG,CBL,CBY1,CCNB1,CD44,CD47,CD81,CD82,Cdc42,CDC42EP1,CDKN1A,CFL1,CHMP2B,CLASP1,Clip1,CLU,CNN2,CSNK2A2,CXADR,CXCL12,CYR61,DAAM1,DAG1,DBN1,DIXDC1,Dock4,DPYSL3,DYNC1LI1,DYNLT1,DYRK1A,EIF4EBP1,EIF4EBP2,ELK1,FASN,FHL2,FLNA,FSCN1,GAS6,GOLGA4,GSN,HMMR,HPRT1,IFRD1,IL33,INHBA,INPPL1,ITGA3,ITGA6,ITGB1,JAK2,KNSTRN,LDLR,MA…	132
CELL-TO-CELL SIGNALING AND INTERACTION	BIMDIMG OF TUMOR CELL LIMES	10.79	1.62x10-11	Increased	2.54	ADAM10,AKAP12,BSG,CBL,CCND1,CD14,CD151,CD28,CD44,CD47,CD81,CD82,CDCP1,CFH,CXADR,CXCL12,CXCL2,CYR61,DAB2,DAG1,DYSF,FLNA,GAS6,GRK6,HMMR,IFITM3,INPPL1,ITGA3,ITGA6,ITGB1,JAK2,LAMC2,LGALS3,MMP14,NID1,PRKCA,PXN,RASA1,SDC1,SERPINE1,SERPINF1,SHC1,SLC4A1,SPP1,STAT1,STAT3,STAT6,TGFB1I1,TIMP3,VCAM1,ZEB1,ZYX	52
PROTEIN SYNTHESIS	METABOLISM OF PROTEIM	10.79	1.62x10-11		0.352	ADAM10,ADAM19,AGAP3,AKIP1,AMFR,ATP1B1,ATP1B3,C1S,CASC3,CBLB,CCND1,CCT6A,CD81,Cdc42,CFL1,CIRBP,CLU,CYP1B1,DAG1,DDX6,DNAJB12,DUS2,ECE1,EIF2S1,EIF3C,EIF3E,EIF4EBP1,EIF4EBP2,EIF4G1,EIF4H,EPRS,ERRFI1,FKBP1A,FLNA,FTH1,FXR1,GGA3,GSN,H2AFZ,HSPA1A/HSPA1B,HYPK,IFNAR1,IGFBP5,INHBA,INPPL1,ITGB1,JAK2,LDLR,LSS,MAG,MAPK3,MARS,MBTPS1,MMP11,MMP14,MVK,MYCBP2,NF2,OAZ2,PAIP2,PAM,PDCD4,PEX19,POLDIP3,PRKCA,PSMF1,RAD23…	98
CANCER, ORGANISMAL INJURY AND ABNORMALITIES	ABDOMIMAL CAMCER	10.78	1.66x10-11		-0.689	AASDHPPT,ABCA7,ABCC1,ABHD4,ACAD8,ACBD3,ACOT9,ACSS2,ACTN1,ACTR1A,ACTR3,ADAM10,ADAM19,ADAR,ADNP,AGAP3,AGPAT5,AGRN,AHI1,AHRR,AJUBA,AKAP12,AKAP2,AKR1C3,ALDH1L2,ALKBH5,ALPK1,AMFR,ANK1,ANKHD1/ANKHD1-EIF4EBP3,ANKRD17,ANKRD52,ANO6,ANXA4,AOX1,AP1B1,AP1M1,AP1S1,APOD,ARF3,ARGLU1,ARHGAP11A,ARHGAP44,ARHGAP5,ARMCX3,ARNT2,ART3,ASAH1,ASNS,ATF5,ATG16L1,ATG3,ATP1B1,ATP1B3,ATP2A2,ATP5SL,ATP6V0C,ATP7A,ATXN7L3B,AUH,A…	632
CANCER, ORGANISMAL INJURY AND ABNORMALITIES	CARCIMOMA	10.764	1.72x10-11		-1.69	AASDHPPT,ABCA7,ABCC1,ABHD4,ACAD8,ACBD3,ACOT9,ACSS2,ACTN1,ACTR1A,ACTR3,ADAM10,ADAM19,ADAR,ADNP,AGAP3,AGO1,AGPAT5,AGRN,AHI1,AHRR,AJUBA,AKAP12,AKAP2,AKR1C3,ALDH1L2,ALKBH5,ALPK1,AMFR,ANK1,ANKHD1/ANKHD1-EIF4EBP3,ANKRD17,ANKRD52,ANO6,ANXA4,AOX1,AP1B1,AP1M1,AP1S1,APOD,ARF3,ARGLU1,ARHGAP11A,ARHGAP44,ARHGAP5,ARMCX3,ARNT2,ART3,ASAH1,ASNS,ATF5,ATG16L1,ATG3,ATP1B1,ATP1B3,ATP2A2,ATP5SL,ATP6V0C,ATP7A,ATXN7L3B,…	639
CELL-TO-CELL SIGNALING AND INTERACTION	IMTERACTIOM OF TUMOR CELL LIMES	10.708	1.96x10-11	Increased	2.427	ADAM10,AKAP12,BSG,CBL,CCND1,CD14,CD151,CD28,CD44,CD47,CD81,CD82,CDCP1,CFH,CXADR,CXCL12,CXCL2,CYR61,DAB2,DAG1,DYSF,FASN,FLNA,GAS6,GRK6,HMMR,IFITM3,INPPL1,ITGA3,ITGA6,ITGB1,JAK2,LAMC2,LGALS3,MMP14,NID1,PRKCA,PXN,RASA1,SDC1,SERPINE1,SERPINF1,SHC1,SLC4A1,SPP1,STAT1,STAT3,STAT6,TGFB1I1,TIMP3,VCAM1,ZEB1,ZYX	53
CELLULAR ASSEMBLY AND ORGANIZATION, CELLULAR FUNCTION AND MAINTENANCE	ORGAMIZATIOM OF CYTOPLASM	10.593	2.55x10-11		1.897	ABCC1,ACTN1,ACTR3,ADAM10,ADNP,AGRN,AHI1,AJUBA,AKAP12,AKAP2,ARHGAP44,ARHGAP5,ATP7A,AXL,BSG,CBL,CBY1,CCNB1,CD44,CD47,CD81,CD82,Cdc42,CDC42EP1,CDKN1A,CFL1,CHMP2B,CLASP1,Clip1,CLU,CNN2,COL4A3BP,CSNK2A2,CXADR,CXCL12,CYR61,DAAM1,DAG1,DBN1,DIXDC1,Dock4,DPYSL3,DYNC1LI1,DYNLT1,DYRK1A,EIF4EBP1,EIF4EBP2,EIF4G1,ELK1,FASN,FHL2,FLNA,FSCN1,GAK,GAS6,GBF1,GOLGA4,GSN,HMMR,HPRT1,IFRD1,IL33,INHBA,INPPL1,ITGA3,ITGA6,…	140
CANCER, GASTROINTESTINAL DISEASE, ORGANISMAL INJURY AND ABNORMALITIES	IMTESTIMAL CARCIMOMA	10.428	3.73x10-11			ABCA7,ABCC1,ABHD4,ACAD8,ACBD3,ACOT9,ACSS2,ACTN1,ACTR1A,ADAM10,ADAM19,ADAR,ADNP,AGAP3,AGPAT5,AGRN,AHI1,AHRR,AKAP12,AKAP2,ALDH1L2,ALKBH5,ALPK1,ANK1,ANKHD1/ANKHD1-EIF4EBP3,ANKRD17,ANKRD52,ANO6,ANXA4,AOX1,AP1B1,AP1M1,AP1S1,ARF3,ARHGAP11A,ARHGAP44,ARHGAP5,ARMCX3,ARNT2,ART3,ASAH1,ATF5,ATG16L1,ATG3,ATP1B3,ATP2A2,ATP6V0C,ATP7A,ATXN7L3B,AXL,BAZ1A,BCL2L11,BLMH,BNIP2,C11orf54,C14orf1,C1QTNF2,C1R,C1S,C2CD2,C…	490
CANCER, ORGANISMAL INJURY AND ABNORMALITIES	BREAST OR COLORECTAL CAMCER	10.356	4.41x10-11	Decreased	-2.054	ABCC1,ABHD4,ACBD3,ACOT9,ACSS2,ADAM10,ADAM19,ADAR,ADNP,AGAP3,AGPAT5,AGRN,AHI1,AHRR,AJUBA,AKAP12,AKAP2,AKR1C3,ALDH1L2,AMFR,ANAPC13,ANK1,ANKHD1/ANKHD1-EIF4EBP3,ANKRD52,ANXA4,AP1S1,ARHGAP11A,ARHGAP44,ARHGAP5,ART3,ASAH1,ATG16L1,ATG3,ATP2A2,ATP7A,AXL,BCL2L11,BSG,C11orf54,C14orf1,C1QTNF2,C1R,C2CD2,C6orf89,C8orf44-SGK3/SGK3,CACNA2D1,CACUL1,CBL,CBX6,CBY1,CCNB1,CCND1,CCND2,CCSER2,CD28,CD44,CD82,Cdc42,CDC42…	388
CELL-TO-CELL SIGNALING AND INTERACTION, CELLULAR ASSEMBLY AND ORGANIZATION	CELL-CELL COMTACT	10.327	4.71x10-11		1.015	ACTN1,ACTR3,ADAM10,ADGRL1,ADNP,AGRN,AJUBA,CACNB2,CBL,CD151,CD44,CD47,CD81,Cdc42,CLU,COL4A1,CSRP2,CTNNA1,CXADR,CXCL12,CYR61,DAB2,DAG1,DYSF,FASN,FSCN1,GJA5,HIPK2,HMGCR,ID2,IFRD1,INHBA,ITGA3,ITGA6,ITGB1,JAK2,LDLR,LGALS3,MMP14,MYCBP2,MYOG,Nes,NF2,PDLIM5,PRKCA,RND3,RTN4,SBNO2,SDCBP,SERPINF1,SHC1,SLC12A2,SLC18A3,SLC3A2,SLC4A2,SOX4,SOX9,SRPX2,STAT1,STAT6,SYNE1,TIMP3,TLN2,TNFRSF11B,UBE2B,UCP2,VCAM1,Wasl,…	71
INFECTIOUS DISEASES	VIRAL IMFECTIOM	10.295	5.07x10-11		-0.283	ACTN1,ACTR3,ADAM10,ADAR,AGO1,AP1B1,AP1M1,AP1S1,ARGLU1,ATF5,ATP1B3,ATP6V0C,AXL,BCL2L11,BNIP2,BSG,C1R,C1S,CACNA2D1,CBL,CBLB,CD14,CD28,CD44,CD47,CD81,CHMP2B,CHRM4,CLU,COL4A3BP,CXADR,CXCL12,CYP51A1,DAG1,DDX6,DNAL1,DPM1,DUSP1,DYRK1A,DYSF,EEA1,EIF2S1,EIF3C,EIF4EBP1,EIF4EBP2,ETS2,FASN,FCGRT,FDFT1,FDPS,FKBP1A,FLNA,FSCN1,FXR1,GABARAPL2,GAK,GAPVD1,GAS6,GATAD2A,GBF1,GRK6,GTF2I,HMGCR,HSPA4,IFITM3,IFNAR1,IRF7…	142
CELLULAR DEVELOPMENT, CELLULAR GROWTH AND PROLIFERATION	CELL PROLIFERATIOM OF TUMOR CELL LIMES	10.21	6.16x10-11		-0.269	ACTN1,ADAM10,AJUBA,AKAP12,AKR1C3,ARHGAP11A,ASAH1,ASNS,ATF5,ATP2A2,ATP7A,AXL,BCL2L11,BSG,C8orf44-SGK3/SGK3,CBL,CCNB1,CCND1,CCND2,CCNL2,CD151,CD28,CD44,CD81,CDCP1,CDKN1A,CIRBP,CLCN3,CLU,CMIP,CNN2,COL4A2,COL6A3,CSNK1G3,CSNK2A2,CXADR,CXCL12,CYP1B1,CYR61,DAB2,DDR2,DUSP1,DUSP19,EIF3C,EIF3E,EIF4EBP1,EIF4H,ELK1,EPHB4,ERRFI1,ETS2,FASN,FDFT1,FHL2,FLNA,FOXQ1,FSCN1,FTH1,GAS6,GTF2I,H2AFZ,HAT1,HIPK2,HMGCR,HMMR…	146
CANCER, GASTROINTESTINAL DISEASE, ORGANISMAL INJURY AND ABNORMALITIES	LARGE IMTESTIME CARCIMOMA	10.062	8.66x10-11			ABCA7,ABCC1,ABHD4,ACAD8,ACBD3,ACOT9,ACSS2,ACTN1,ACTR1A,ADAM10,ADAM19,ADAR,ADNP,AGAP3,AGPAT5,AGRN,AHI1,AHRR,AKAP12,AKAP2,ALDH1L2,ALKBH5,ALPK1,ANK1,ANKHD1/ANKHD1-EIF4EBP3,ANKRD17,ANKRD52,ANO6,ANXA4,AOX1,AP1B1,AP1M1,AP1S1,ARF3,ARHGAP11A,ARHGAP44,ARHGAP5,ARMCX3,ARNT2,ART3,ASAH1,ATF5,ATG16L1,ATG3,ATP1B3,ATP2A2,ATP6V0C,ATP7A,ATXN7L3B,AXL,BAZ1A,BCL2L11,BLMH,BNIP2,C11orf54,C14orf1,C1QTNF2,C1R,C1S,C2CD2,C…	487
CELL DEATH AND SURVIVAL	CELL DEATH OF TUMOR CELL LIMES	10.041	9.09x10-11		0.059	ABCC1,ADAM10,ADNP,AKAP12,AKIP1,ASAH1,ASNS,ATG3,ATP1B3,ATP2A2,AXL,BAZ1A,BCL2L11,BNIP2,BTG1,C8orf44-SGK3/SGK3,CBL,CCNB1,CCND1,CCND2,CCNL2,CCT6A,CD14,CD28,CD44,CD47,CD82,Cdc42,CDCP1,CDKN1A,CFH,CLASP1,CLU,CNN2,COL4A1,COL4A2,CSNK2A2,CUX1,CXCL12,CYP1B1,CYR61,DAB2,DHCR7,DUSP1,DUT,EIF2S1,EIF4EBP1,ELK1,EPHB4,ETS2,FASN,FDFT1,FKBP1A,FKBP8,FOXO4,FTH1,GRINA,GSN,HAT1,HIPK2,HMMR,HSPA1A/HSPA1B,HSPA4,HSPB11,HYPK,…	140
CELL MORPHOLOGY	MORPHOLOGY OF CELLS	10	1.00x10-10			ACTN1,ADAM10,ADAR,ADNP,AGRN,AHI1,ANO6,ARHGAP5,ASAH1,ATG3,ATP2A2,ATP6V0C,BAZ1A,BCL2L11,C8orf44-SGK3/SGK3,CBL,CBLB,CBY1,CCND1,CCND2,CD151,CD28,CD44,CD47,CD81,Cdc42,CDCP1,CDKN1A,CFH,CFL1,CIRBP,CLCN3,CLDN15,Clip1,CLU,CMIP,CNN2,CREB5,CSNK2A2,CSRP2,CTDNEP1,CXADR,CXCL12,CYP1B1,CYP39A1,DAAM1,DAG1,DBN1,DIXDC1,DPYSL3,DUSP1,DYRK1A,DYSF,ECE1,EIF4EBP1,EIF4EBP2,ELK1,ERF,ETS2,FASN,FHL2,FLNA,FOXO4,FSCN1,FSTL1,FX…	180
CELL MORPHOLOGY, CELLULAR MOVEMENT	CELL SPREADIMG	9.886	1.30x10-10		1.817	AKAP12,ARHGAP11A,CBL,CD151,CD28,CD44,CD47,CD81,CNN2,CXCL12,CYR61,DAB2,FLNA,IGFBP5,INPPL1,ITGA11,ITGA3,ITGA6,ITGB1,JAK2,LGALS3,LPP,MAPK3,MAPRE3,NCDN,NF2,PXN,RALBP1,RTN4,SDC1,SERPINA3,SERPINE1,SPP1,STAT3,TGFB1I1,TGFBI,TNN,VCAM1,Wasl,ZYX	40
EMBRYONIC DEVELOPMENT, ORGANISMAL DEVELOPMENT	DEVELOPMEMT OF BODY TRUMK	9.83	1.48x10-10		-0.489	ADAM10,ADAM19,ADAR,AHI1,AKAP12,AKIP1,ANKRD17,ANXA4,AP1B1,ARHGAP5,ASAH1,ATP2A2,ATP7A,BCL2L11,CBL,CBY1,CCND1,CCND2,CD14,CD44,CD81,Cdc42,CDKN1A,CIC,CLU,COL4A3BP,CXADR,CXCL12,CYP51A1,CYR61,DAAM1,DHCR7,DUSP1,DYRK1A,ECE1,EPHB4,ERMP1,ERRFI1,FASN,FKBP1A,FLNA,FSTL1,GAK,GJA5,GSN,HAT1,HSD17B7,HSPB11,ID2,ID3,IGFBP5,INHBA,IRS2,ITGA11,ITGA3,ITGA6,ITGB1,ITPA,JAG1,JAK2,KDM5B,KLF6,LEPROTL1,LGALS3,MAPK3,MMP14,MYOG…	116
CELLULAR MOVEMENT	IMVASIOM OF CELLS	9.757	1.75x10-10		0.77	ADAM10,AKAP12,ATP6V0C,AXL,BSG,CBL,CCND1,CD14,CD151,CD44,CD81,CD82,Cdc42,CDCP1,CDKN1A,CFH,CLU,CSNK2A2,CXCL12,CYP1B1,CYR61,DAB2,DIXDC1,DPYSL3,DUSP1,ECE1,EIF3E,ELK1,EPHB4,ETS2,FHL2,FKBP1A,FLNA,FSCN1,FSTL1,GSN,HIPK2,ID2,IFITM3,IL33,INHBA,INSIG2,IRS2,ITGA3,ITGA6,ITGB1,JAK2,KDM5A,KLF6,LGALS3,MMP14,Nes,NF2,NFAT5,NOTCH2,NRP2,PDCD4,PIP5K1A,PLAC1,PPIC,PRKCA,PRRX1,PXN,RALA,RALBP1,RASA1,RBFOX2,RND3,RORA,S100…	93
CANCER, GASTROINTESTINAL DISEASE, ORGANISMAL INJURY AND ABNORMALITIES	GASTROIMTESTIMAL CARCIMOMA	9.678	2.10x10-10			ABCA7,ABCC1,ABHD4,ACAD8,ACBD3,ACOT9,ACSS2,ACTN1,ACTR1A,ADAM10,ADAM19,ADAR,ADNP,AGAP3,AGPAT5,AGRN,AHI1,AHRR,AKAP12,AKAP2,ALDH1L2,ALKBH5,ALPK1,ANK1,ANKHD1/ANKHD1-EIF4EBP3,ANKRD17,ANKRD52,ANO6,ANXA4,AOX1,AP1B1,AP1M1,AP1S1,ARF3,ARHGAP11A,ARHGAP44,ARHGAP5,ARMCX3,ARNT2,ART3,ASAH1,ATF5,ATG16L1,ATG3,ATP1B3,ATP2A2,ATP6V0C,ATP7A,ATXN7L3B,AXL,BAZ1A,BCL2L11,BLMH,BNIP2,C11orf54,C14orf1,C1QTNF2,C1R,C1S,C2CD2,C…	506
CANCER, GASTROINTESTINAL DISEASE, ORGANISMAL INJURY AND ABNORMALITIES	IMTESTIMAL ADEMOCARCIMOMA	9.59	2.57x10-10			ABCA7,ABCC1,ABHD4,ACAD8,ACBD3,ACOT9,ACSS2,ACTN1,ACTR1A,ADAM10,ADAM19,ADAR,ADNP,AGAP3,AGPAT5,AGRN,AHI1,AHRR,AKAP12,AKAP2,ALDH1L2,ALKBH5,ALPK1,ANK1,ANKHD1/ANKHD1-EIF4EBP3,ANKRD17,ANKRD52,ANO6,ANXA4,AOX1,AP1B1,AP1M1,AP1S1,ARF3,ARHGAP11A,ARHGAP44,ARHGAP5,ARMCX3,ARNT2,ART3,ASAH1,ATF5,ATG16L1,ATG3,ATP1B3,ATP2A2,ATP6V0C,ATP7A,ATXN7L3B,AXL,BAZ1A,BCL2L11,BLMH,BNIP2,C11orf54,C14orf1,C1QTNF2,C1R,C1S,C2CD2,C…	482
CELLULAR MOVEMENT	MIGRATIOM OF TUMOR CELL LIMES	9.386	4.11x10-10		0.87	ADAM10,AKAP12,ARHGAP11A,ASNS,AXL,BSG,C8orf44-SGK3/SGK3,CCND1,CD151,CD44,CD47,CD81,CD82,CDCP1,CDKN1A,CLU,CXCL12,CXCL2,CYR61,DAB2,DDR2,ELK1,FHL2,FLNA,FOXQ1,FSCN1,GAS6,GRINA,GRK6,HMMR,ID2,IFITM3,IFNAR1,ITGA6,ITGB1,JAK2,KARS,KDM5A,KLF6,LAMC2,LGALS3,MAPK3,MMP14,Nes,NF2,NOTCH2,NRP2,PDCD4,PLAC1,PPIC,PRKCA,PRRX1,PXN,RALA,RALBP1,RASA1,RNF41,S100A4,SDC1,SDCBP,SERPINE1,SERPINF1,SHC1,SLC12A2,SOCS3,SOX9,SPP1,…	81
CANCER, GASTROINTESTINAL DISEASE, ORGANISMAL INJURY AND ABNORMALITIES	GASTROIMTESTIMAL MEOPLASIA	9.38	4.17x10-10		-1.874	ABCA7,ABCC1,ABHD4,ACAD8,ACBD3,ACOT9,ACSS2,ACTN1,ACTR1A,ADAM10,ADAM19,ADAR,ADNP,AGAP3,AGPAT5,AGRN,AHI1,AHRR,AJUBA,AKAP12,AKAP2,AKR1C3,ALDH1L2,ALKBH5,ALPK1,ANK1,ANKHD1/ANKHD1-EIF4EBP3,ANKRD17,ANKRD52,ANO6,ANXA4,AOX1,AP1B1,AP1M1,AP1S1,ARF3,ARHGAP11A,ARHGAP44,ARHGAP5,ARMCX3,ARNT2,ART3,ASAH1,ATF5,ATG16L1,ATG3,ATP1B3,ATP2A2,ATP6V0C,ATP7A,ATXN7L3B,AXL,BAZ1A,BCL2L11,BLMH,BNIP2,BSG,C11orf54,C14orf1,C1QTNF…	536
CANCER, GASTROINTESTINAL DISEASE, ORGANISMAL INJURY AND ABNORMALITIES	DIGESTIVE SYSTEM CAMCER	9.333	4.65x10-10	Decreased	-2.002	ABCA7,ABCC1,ABHD4,ACAD8,ACBD3,ACOT9,ACSS2,ACTN1,ACTR1A,ACTR3,ADAM10,ADAM19,ADAR,ADNP,AGAP3,AGPAT5,AGRN,AHI1,AHRR,AJUBA,AKAP12,AKAP2,AKR1C3,ALDH1L2,ALKBH5,ALPK1,AMFR,ANK1,ANKHD1/ANKHD1-EIF4EBP3,ANKRD17,ANKRD52,ANO6,ANXA4,AOX1,AP1B1,AP1M1,AP1S1,ARF3,ARGLU1,ARHGAP11A,ARHGAP44,ARHGAP5,ARMCX3,ARNT2,ART3,ASAH1,ATF5,ATG16L1,ATG3,ATP1B1,ATP1B3,ATP2A2,ATP6V0C,ATP7A,ATXN7L3B,AXL,BAZ1A,BCL2L11,BLMH,BNIP2,BS…	586
CANCER, ORGANISMAL INJURY AND ABNORMALITIES	BEMIGM COMMECTIVE OR SOFT TISSUE MEOPLASM	9.311	4.89x10-10			CAVIN2,CBL,CCND1,CCND2,CFH,COL4A1,COL4A2,COL6A3,CUX1,CYP1B1,CYR61,DDR2,DDX24,DDX6,DUSP1,EIF4EBP1,FDFT1,FDPS,FKBP1A,FTH1,HMMR,IFNAR1,IGFBP5,MAPK3,MFHAS1,MMP11,MRVI1,MTHFD2,NF2,NR2F2,PCCA,PDK4,PIK3R3,PKIA,PPP4C,PSMC3IP,RORA,SERPINE1,SHC1,SLC18A3,SOCS3,SOX4,TBL1X,TUBA8,UBE2B,WISP2,ZEB1,ZYX	48
CELLULAR GROWTH AND PROLIFERATION	OUTGROWTH OF CELLS	9.249	5.63x10-10		1.144	ABCC1,ADAM10,ADNP,ARHGAP5,CCND1,CD47,Cdc42,CDKN1A,CLU,CXCL12,CXCL2,CYR61,DPYSL3,DYRK1A,EEA1,ELK1,HMGCR,IL6ST,ITGA3,ITGA6,ITGB1,JAK2,MAG,MAPK3,MARK2,MMP14,NCDN,NEFH,NF2,PIP5K1A,PJA2,PXN,RASA1,RNF6,RTN4,S100A4,SCN1B,SERPINE1,SERPINE2,SHC1,SLC12A2,SNX12,SPTBN1,STAT3,STK38L,TNN,Tpm3,TTLL7,ULK1,VCAM1,Wasl,WISP2	52
CONNECTIVE TISSUE DEVELOPMENT AND FUNCTION, TISSUE DEVELOPMENT	GROWTH OF COMMECTIVE TISSUE	9.208	6.20x10-10		-0.493	ADAR,AKAP12,BTG1,C8orf44-SGK3/SGK3,CASC3,CBL,CCNB1,CCND1,CCND2,CD28,CD44,Cdc42,CDKN1A,CIRBP,CXCL12,CYR61,DDR2,DUSP1,ELK1,ERF,ERRFI1,FNDC3B,FOXO4,FTH1,GAS6,HAT1,HIPK2,HMMR,HSPA1A/HSPA1B,ID2,IFNAR1,IGFBP5,IL6ST,INHBA,ITGB1,JAK2,KDM5A,LEPROTL1,LGALS3,MAPK3,MLLT6,MMP14,NBN,NF2,NOTCH2,PRKCA,RASA1,SAFB,SERPINE1,SERPINF1,SLC3A2,SMAD6,SMARCA4,SOCS3,SOX4,SPP1,STARD10,STAT1,STAT3,TGFB1I1,TGFB2,TLN2,TNFRSF1…	70
CANCER, GASTROINTESTINAL DISEASE, HEPATIC SYSTEM DISEASE, ORGANISMAL INJURY AND ABNORMALITIES	LIVER CARCIMOMA	9.14	7.25x10-10		-0.265	ABCA7,ABCC1,ACBD3,ACSS2,ACTN1,ACTR1A,ACTR3,ADAM19,ADAR,ADNP,AGRN,AHI1,ALPK1,AMFR,ANK1,ANKHD1/ANKHD1-EIF4EBP3,ANKRD17,ANO6,AOX1,AP1B1,AP1M1,ARGLU1,ARHGAP44,ARHGAP5,ARNT2,ASAH1,ATF5,ATG16L1,ATP1B1,ATP1B3,ATP2A2,ATP7A,ATXN7L3B,AXL,BAZ1A,BCL2L11,BNIP2,BSG,C1QTNF2,C1R,C1S,C3orf70,CACNA2D1,CACNB2,CBLB,CBX6,CCNB1,CCND1,CCT6A,CD44,CD47,CD82,CDCP1,CDH15,CDKN1A,CHERP,CHRM4,CHST2,CHURC1,CIC,CLASP1,CLCN3,CNN…	299
CANCER, GASTROINTESTINAL DISEASE, ORGANISMAL INJURY AND ABNORMALITIES	LARGE IMTESTIME ADEMOCARCIMOMA	9.13	7.41x10-10			ABCA7,ABCC1,ABHD4,ACAD8,ACBD3,ACOT9,ACSS2,ACTN1,ACTR1A,ADAM10,ADAM19,ADAR,ADNP,AGAP3,AGPAT5,AGRN,AHI1,AHRR,AKAP12,AKAP2,ALDH1L2,ALKBH5,ALPK1,ANK1,ANKHD1/ANKHD1-EIF4EBP3,ANKRD17,ANKRD52,ANO6,ANXA4,AOX1,AP1B1,AP1M1,AP1S1,ARF3,ARHGAP11A,ARHGAP44,ARHGAP5,ARMCX3,ARNT2,ART3,ASAH1,ATF5,ATG16L1,ATG3,ATP1B3,ATP2A2,ATP6V0C,ATP7A,ATXN7L3B,AXL,BAZ1A,BCL2L11,BLMH,BNIP2,C11orf54,C14orf1,C1QTNF2,C1R,C1S,C2CD2,C…	479
CARDIOVASCULAR DISEASE, CARDIOVASCULAR SYSTEM DEVELOPMENT AND FUNCTION	ABMORMAL MORPHOLOGY OF CARDIOVASCULAR SYSTEM	9.098	7.98x10-10			ADAM10,ADAM19,AKAP12,ANKRD17,ATP2A2,AXL,C1GALT1C1,CCND1,CCND2,CD151,CD44,CDKN1A,CFH,CLU,CSRP2,CXADR,CXCL12,CYP51A1,ECE1,FKBP1A,FLNA,FXR1,GJA5,Hist1h1e,HSD17B7,IL6ST,ITGA3,ITPA,JAG1,LDLR,MARK2,MMP14,NEXN,NFAT5,NID1,NR2F2,PAM,PDLIM5,PRKCA,PRRX1,PRRX2,PTGIS,PXN,RASA1,SHC1,SLC4A1,SMTN,SOX4,SPP1,SPTBN1,TCF7L1,TFAP2A,TGFB2,TIMP3,TNFRSF11B,TRAF6,TTN,ULK1,VCAM1,Wasl,ZC3H12A,ZEB1	62
ORGANISMAL DEVELOPMENT	GROWTH OF ORGAMISM	9.049	8.94x10-10		0.909	ABCC1,ADAR,ADNP,AGO1,ARHGAP5,ATF5,ATP6V0C,C8orf44-SGK3/SGK3,CCND1,CD44,CD81,Cdc42,CDKN1A,CFL1,CLU,COL4A1,COL4A2,CTNNA1,CXCL12,CXCL2,DAG1,DHCR7,DYRK1A,EIF3E,EIF4EBP1,ETS2,FDFT1,FKBP8,GATAD2A,GSN,ID2,ID3,IFNAR1,IGFBP5,IL6ST,INHBA,IRS2,ISG15,ITGA6,ITGB1,JAG1,JAK2,KARS,KDM5B,MAPK3,MID1IP1,MXD3,MXI1,NBN,NFIC,NOTCH2,PLXNB2,PRRX1,PRRX2,PTPMT1,RAD23B,RASA1,RBBP6,RC3H2,Rcan1,RERE,S100A4,SCN1B,SERPINF1,SGK…	84
CELLULAR DEVELOPMENT, CONNECTIVE TISSUE DEVELOPMENT AND FUNCTION, TISSUE DEVELOPMENT	DIFFEREMTIATIOM OF COMMECTIVE TISSUE CELLS	8.983	1.04x10-9		-0.26	ADAR,ATF5,ATP2A2,CBL,CBY1,CCND1,CD47,CDKN1A,CREB5,CYR61,DDR2,EPHB4,FASN,FHL2,FNDC3B,GSN,ID2,ID3,IGFBP5,IL33,IL6ST,INHBA,INSIG1,IRS2,ITGA11,ITGA6,ITGB1,JAG1,KDM5A,MAPK3,MBTPS1,MMP11,MMP14,NBR1,NFIB,NFIC,NOTCH2,NUCB2,PDK4,PRKCA,PRRX2,Ptprv,RORA,SBNO2,SCAND1,SCD,SERPINF1,SGK1,SMAD6,SMARCA2,SMARCA4,SMOC1,SOCS3,SOCS7,SORT1,SOX9,SPP1,STAT1,STAT3,STAT6,TBL1X,TGFB1I1,TGFB2,TIMP3,TNFRSF11B,TNN,TRAF6,UCHL3…	70
CELLULAR DEVELOPMENT, CELLULAR GROWTH AND PROLIFERATION, NERVOUS SYSTEM DEVELOPMENT AND FUNCTION, TISSUE DEVELOPMENT	DEVELOPMEMT OF MEUROMS	8.928	1.18x10-9		1.633	ACTR3,ADAM10,ADAM19,ADGRL1,ADNP,AGRN,ARHGAP5,ATP7A,CACNB2,CD44,CD47,Cdc42,CDKN1A,CFL1,CHMP2B,CLU,COL4A1,CSNK2A2,CXCL12,CYR61,DBN1,DIXDC1,Dock4,DPYSL3,DYNC1LI1,DYNLT1,DYRK1A,EBF3,ECE1,EIF4EBP1,EIF4EBP2,ELK1,FLNA,GSN,HIPK2,HPRT1,ID2,INHBA,ITGA3,ITGB1,JAK2,MAG,MAP6,MAPK8IP2,MARK2,MYCBP2,NCDN,NEFH,NFIB,NRP2,NSG1,PDLIM5,PHGDH,PIP5K1A,PLXNB2,PRKCA,PXN,RALA,RBFOX2,RERE,RTN4,SDCBP,SERPINF1,SGK1,SHC1,SLC1…	82
CELL CYCLE	CELL CYCLE PROGRESSIOM	8.893	1.28x10-9		1.425	AJUBA,ANKRD17,ASNS,AXL,BAZ1A,BCL2L11,BTG1,C6orf89,C8orf44-SGK3/SGK3,CACUL1,CBL,CCNB1,CCND1,CCND2,CCPG1,CD14,CD28,CD44,Cdc42,CDKN1A,CIRBP,CLASP1,CLU,CSNK2A2,CUX1,CXCL12,CYR61,DDR2,DIXDC1,DUSP1,DYNC1LI1,EIF3E,EIF4EBP1,ELK1,ERF,ERRFI1,FASN,FHL2,FKBP1A,FLNA,FOXO4,GAS6,GBF1,HAT1,HIPK2,HSPA1A/HSPA1B,HYPK,ID2,ID3,IGFBP5,INHBA,IRF7,IRS2,ITGB1,JAK2,KDM5A,KDM5B,KLF6,KMT5A,LGALS3,MAPK3,MLLT6,MXI1,MYOG,NBN,N…	100
CELLULAR GROWTH AND PROLIFERATION, CONNECTIVE TISSUE DEVELOPMENT AND FUNCTION, TISSUE DEVELOPMENT	PROLIFERATIOM OF COMMECTIVE TISSUE CELLS	8.889	1.29x10-9		-0.636	ADAR,AKAP12,C8orf44-SGK3/SGK3,CASC3,CBL,CCNB1,CCND1,CCND2,CD44,Cdc42,CDKN1A,CIRBP,CXCL12,CYR61,DDR2,DUSP1,ERF,ERRFI1,FNDC3B,FOXO4,FTH1,GAS6,HAT1,HMMR,HSPA1A/HSPA1B,ID2,IFNAR1,IGFBP5,IL6ST,INHBA,ITGB1,KDM5A,LEPROTL1,LGALS3,MAPK3,MLLT6,MMP14,NBN,NF2,NOTCH2,PRKCA,RASA1,SAFB,SERPINE1,SERPINF1,SLC3A2,SMAD6,SMARCA4,SOCS3,SOX4,SPP1,STARD10,STAT1,STAT3,TGFB1I1,TGFB2,TLN2,TNFRSF11B,TNN,TPR,TRIM25,USP7,Was…	65
CELL-TO-CELL SIGNALING AND INTERACTION	BIMDIMG OF COMMECTIVE TISSUE CELLS	8.866	1.36x10-9	Increased	2.203	ADNP,AKAP12,CBL,CCND1,CD28,CD44,CLU,CXCL12,CYR61,GSN,ITGA11,ITGB1,JAG1,LDLR,MAPK3,NF2,PRKCA,RASA1,SBNO2,SDC1,SLC4A2,SPP1,TGFBI,TLN2,TNFRSF11B,VCAM1,WISP2,ZYX	28
LIPID METABOLISM, SMALL MOLECULE BIOCHEMISTRY, VITAMIN AND MINERAL METABOLISM	SYMTHESIS OF CHOLESTEROL	8.833	1.47x10-9		-1.444	CYP51A1,CYP7A1,DHCR7,FDFT1,FDPS,FOXO4,HMGCR,HSD17B7,IDI1,INSIG1,INSIG2,LDLR,LSS,MBTPS1,MVK,PMVK	16
CARDIOVASCULAR SYSTEM DEVELOPMENT AND FUNCTION	MORPHOLOGY OF CARDIOVASCULAR SYSTEM	8.821	1.51x10-9			ADAM10,ADAM19,AKAP12,ANKRD17,ATP2A2,AXL,C1GALT1C1,CACNA2D1,CACNB2,CCND1,CCND2,CD151,CD44,CDKN1A,CFH,CLU,CSRP2,CXADR,CXCL12,CYP51A1,DAG1,DUSP1,DYRK1A,ECE1,EIF4EBP1,FASN,FHL2,FKBP1A,FLNA,FXR1,GAS6,GJA5,GSN,H2AFZ,Hist1h1e,HMGCR,HPRT1,HSD17B7,IL33,IL6ST,INHBA,ITGA11,ITGA3,ITPA,JAG1,LDLR,MAPK3,MARK2,MMP14,NEXN,NFAT5,NID1,NR2F2,PAM,PDLIM5,PRKCA,PRRX1,PRRX2,PTGIS,PXN,RASA1,SERPINE1,SHC1,SLC18A3,SLC4A1,S…	84
TISSUE MORPHOLOGY	MORPHOLOGY OF COMMECTIVE TISSUE	8.724	1.89x10-9			ADAM10,ANKRD17,ATP6V0C,CBL,CBY1,CCND1,CD44,Cdc42,CDKN1A,CLCN3,CREB5,CXADR,DUSP1,EIF4EBP1,ERRFI1,FSTL1,GSN,Hist1h1e,HSD17B7,ID2,IFNAR1,IFRD1,IGFBP5,IL6ST,INSIG1,IRS2,ITGA11,ITGB1,JAG1,KLF3,KNSTRN,LDLR,LRRK1,MARK2,MBTPS1,MMP14,PDK4,PRRX1,PRRX2,PTGIS,RAD23B,RASA1,S100A4,SBNO2,SC5D,SCD,SERPINE1,SHC1,SLC12A2,SLC4A1,SLC4A2,SMAD6,SMTN,SOX9,SPP1,STAT1,TCF7L1,TFAP2A,TGFB1I1,TGFB2,TIMP3,TNFRSF11B,TPR,TRAF6…	70
CELLULAR MOVEMENT, HEMATOLOGICAL SYSTEM DEVELOPMENT AND FUNCTION, IMMUNE CELL TRAFFICKING, INFLAMMATORY RESPONSE	CELL MOVEMEMT OF PHAGOCYTES	8.699	2.00x10-9		-1.427	ABCC1,ADAM10,ANO6,BSG,CCND1,CD14,CD151,CD28,CD44,CD47,CD81,Cdc42,CDKN1A,CFH,CNN2,COL4A1,CXADR,CXCL12,CXCL2,CYR61,DDR2,DUSP1,FHL2,FLNA,GAS6,GBF1,GRK6,GSN,IL33,IL6ST,INHBA,ITGA6,ITGB1,KARS,LDLR,LGALS3,MAPK3,MMP14,MYRF,NARS,NRP2,PRKCA,RTN4,S100A4,SDC1,SELENOK,SERPINA3,SERPINB1,SERPINE1,SERPINF1,SGK1,SOCS3,SOD3,SPP1,STAT1,STAT3,STAT6,TGFB2,TIMP3,TRAF6,UNC5B,VCAM1	62
CANCER, GASTROINTESTINAL DISEASE, ORGANISMAL INJURY AND ABNORMALITIES	DIGESTIVE ORGAM TUMOR	8.524	2.99x10-9		-1.987	ABCA7,ABCC1,ABHD4,ACAD8,ACBD3,ACOT9,ACSS2,ACTN1,ACTR1A,ACTR3,ADAM10,ADAM19,ADAR,ADNP,AGAP3,AGPAT5,AGRN,AHI1,AHRR,AJUBA,AKAP12,AKAP2,AKR1C3,ALDH1L2,ALKBH5,ALPK1,AMFR,ANK1,ANKHD1/ANKHD1-EIF4EBP3,ANKRD17,ANKRD52,ANO6,ANXA4,AOX1,AP1B1,AP1M1,AP1S1,ARF3,ARGLU1,ARHGAP11A,ARHGAP44,ARHGAP5,ARMCX3,ARNT2,ART3,ASAH1,ATF5,ATG16L1,ATG3,ATP1B1,ATP1B3,ATP2A2,ATP6V0C,ATP7A,ATXN7L3B,AXL,BAZ1A,BCL2L11,BLMH,BNIP2,BS…	591
CELL DEATH AND SURVIVAL	CELL SURVIVAL	8.474	3.36x10-9		1.83	ABCC1,ADAR,ADNP,AGRN,APOD,ASAH1,ASNS,ATF5,ATG3,ATP7A,AXL,BCL2L11,BNIP2,C8orf44-SGK3/SGK3,CBL,CBLB,CCNB1,CCND1,CD151,CD28,CD44,CD47,CD81,CD82,CDKN1A,CFH,CLU,CUX1,CXCL12,CXCL2,CYR61,DAB2,DUSP1,DUSP19,DYRK1A,EBF3,EBNA1BP2,EIF2S1,EIF3C,EIF3E,EIF4G1,ELK1,EPHB4,ETS2,FASN,FLNA,FTH1,GAK,GAS6,GRK6,Hdac1l,HELB,HIPK2,HNRNPUL1,HSPA1A/HSPA1B,HSPA4,ID2,IGFBP5,IL33,IL6ST,INPP5A,INSIG1,IRS2,ITGA3,ITGA6,ITGB1,JAG…	125
HEREDITARY DISORDER, ORGANISMAL INJURY AND ABNORMALITIES	AUTOSOMAL DOMIMAMT DISEASE	8.471	3.38x10-9			ACTN1,ADAM10,ADNP,BCL2L11,C1R,C1S,CACNA2D1,CACNB2,CBL,CCND1,CCND2,CDH15,CFL1,CLU,CNNM2,COL4A1,COL4A2,COL4A3BP,COL6A3,CSRP2,CTNNA1,DAB2,DCAF8,DPYSL3,DYRK1A,DYSF,EBF3,ECE1,EIF4EBP1,EIF4G1,ERF,ETS2,FAM111A,FKBP1A,FTH1,GSN,HEPH,HMGCR,IGFBP5,ITPA,JAG1,JAK2,KCNT1,LBR,LDLR,MARS,MED13L,MVD,MVK,MYOG,NEFH,NF2,NFAT5,NOTCH2,NR2F2,PABPN1,PCLAF,PIEZO1,PLA1A,PLA2G2A,PRKCA,PTGIS,RERE,RTN4,SCN1B,SDCBP,SERPINA3,SL…	85
CANCER, GASTROINTESTINAL DISEASE, HEPATIC SYSTEM DISEASE, ORGANISMAL INJURY AND ABNORMALITIES	HEPATOBILIARY SYSTEM CAMCER	8.369	4.28x10-9		-0.526	ABCA7,ABCC1,ACBD3,ACSS2,ACTN1,ACTR1A,ACTR3,ADAM10,ADAM19,ADAR,ADNP,AGRN,AHI1,ALPK1,AMFR,ANK1,ANKHD1/ANKHD1-EIF4EBP3,ANKRD17,ANO6,AOX1,AP1B1,AP1M1,ARGLU1,ARHGAP44,ARHGAP5,ARNT2,ASAH1,ATF5,ATG16L1,ATP1B1,ATP1B3,ATP2A2,ATP7A,ATXN7L3B,AXL,BAZ1A,BCL2L11,BNIP2,BSG,C1QTNF2,C1R,C1S,C3orf70,CACNA2D1,CACNB2,CBLB,CBX6,CCNB1,CCND1,CCT6A,CD14,CD44,CD47,CD82,CDCP1,CDH15,CDKN1A,CHERP,CHRM4,CHST2,CHURC1,CIC,CLAS…	309
CELLULAR ASSEMBLY AND ORGANIZATION, CELLULAR FUNCTION AND MAINTENANCE	MICROTUBULE DYMAMICS	8.326	4.72x10-9		1.65	ABCC1,ACTR3,ADAM10,ADNP,AGRN,AHI1,AJUBA,AKAP12,ARHGAP44,ARHGAP5,ATP7A,AXL,BSG,CBL,CBY1,CD44,CD47,CD81,CD82,Cdc42,CDC42EP1,CDKN1A,CFL1,CHMP2B,CLASP1,Clip1,CLU,CSNK2A2,CXCL12,CYR61,DAAM1,DAG1,DBN1,DIXDC1,Dock4,DPYSL3,DYNLT1,DYRK1A,EIF4EBP1,EIF4EBP2,ELK1,FASN,FLNA,FSCN1,GAS6,GOLGA4,GSN,HMMR,HPRT1,IFRD1,INHBA,INPPL1,ITGA3,ITGA6,ITGB1,JAK2,LDLR,MAG,MAP6,MAPK8IP2,MAPRE3,MARK2,MID1IP1,MTSS1,NCDN,NEFH,NF…	109
CANCER, ORGANISMAL INJURY AND ABNORMALITIES	COMMECTIVE OR SOFT TISSUE TUMOR	8.276	5.30x10-9		-1.638	ABCC1,AGRN,AHI1,CACNA2D1,CAVIN2,CBL,CCND1,CCND2,CD44,CDKN1A,CFH,CHERP,CLU,CNN2,COL4A1,COL4A2,COL6A3,CUX1,CXCL12,CYP1B1,CYP7A1,CYR61,DDR2,DDX24,DDX6,DUSP1,EIF4EBP1,EIF4G1,FASN,FDFT1,FDPS,FKBP10,FKBP1A,FLNA,FTH1,GSE1,GSTM3,HELB,HIPK2,HMMR,HSPA1A/HSPA1B,HSPA4,ID2,IFNAR1,IGFBP5,INHBA,INPP5A,IRF7,ITGA11,JAK2,KLF3,LAMC2,MAPK3,MBTPS1,MFHAS1,MLYCD,MMP11,MRVI1,MTHFD2,MXI1,MYCBP2,NBN,NF2,NOTCH2,NR2F2,PCCA,…	101
CELLULAR MOVEMENT	CELL MOVEMEMT OF TUMOR CELL LIMES	8.228	5.92x10-9		1.141	ACTN1,ADAM10,AKAP12,ARHGAP11A,ASNS,AXL,BSG,C8orf44-SGK3/SGK3,CBL,CCND1,CD151,CD28,CD44,CD47,CD81,CD82,CDCP1,CDKN1A,CLCN3,CLU,COL4A3BP,CXCL12,CXCL2,CYR61,DAB2,DDR2,ELK1,FHL2,FLNA,FOXQ1,FSCN1,GAS6,GRINA,GRK6,HIPK2,HMMR,ID2,IFITM3,IFNAR1,INPPL1,ITGA6,ITGB1,JAK2,KARS,KDM5A,KLF6,LAMC2,LGALS3,MAPK3,MAPRE3,MMP14,Nes,NF2,NOTCH2,NRP2,PDCD4,PLAC1,PPIC,PRKCA,PRRX1,PXN,RALA,RALBP1,RASA1,RNF41,S100A4,SDC1,SDC…	90
LIPID METABOLISM, SMALL MOLECULE BIOCHEMISTRY, VITAMIN AND MINERAL METABOLISM	METABOLISM OF CHOLESTEROL	8.2	6.31x10-9		-1.805	CYP39A1,CYP51A1,CYP7A1,DHCR7,FDFT1,FDPS,FDX1,FOXO4,HMGCR,HSD17B7,IDI1,INSIG1,INSIG2,LDLR,LSS,MBTPS1,MVK,NSDHL,PMVK,SQLE	20
CARDIOVASCULAR SYSTEM DEVELOPMENT AND FUNCTION, ORGANISMAL DEVELOPMENT	AMGIOGEMESIS	8.197	6.36x10-9		-0.024	ANKRD17,ATP7A,AXL,BSG,BTG1,C1GALT1C1,CBL,CCND1,CD151,CD28,CD44,CD82,Cdc42,CDKN1A,COL4A1,COL4A2,CXCL12,CXCL2,CYP1B1,CYP51A1,CYR61,DAAM1,DAB2,DHCR7,ECE1,EPHB4,FHL2,FLNA,FOXO4,GAS6,GATAD2A,GJA5,GRK6,GSN,GTF2I,HIPK2,HSD17B7,ID3,IFNAR1,IL6ST,INHBA,ITGB1,JAG1,JAK2,KLF6,LEPROTL1,LGALS3,MMP14,NFAT5,NR2F2,NRP2,PDCL3,PRKCA,PRKX,PRRX1,PRRX2,PTGIS,RAD23B,RASA1,RASA3,RORA,RTN4,S100A4,SERPINA3,SERPINE1,SERPINF…	90
ORGANISMAL DEVELOPMENT, ORGANISMAL INJURY AND ABNORMALITIES	ABMORMAL MORPHOLOGY OF THORACIC CAVITY	8.149	7.10x10-9			ADAM10,ADAM19,AKAP12,ANKRD17,ARHGAP5,ATP2A2,CBL,CBY1,CCND1,CCND2,CD28,CD81,CDKN1A,CLU,CSRP2,CXADR,CYP51A1,DUSP1,ECE1,ERRFI1,FKBP1A,FLNA,FSTL1,FXR1,GAK,GJA5,HAT1,Hist1h1e,HSD17B7,ID3,IL6ST,ITGA3,ITGA6,ITPA,JAG1,MMP14,NEXN,NFAT5,NFIB,NR2F2,PDLIM5,PRKCA,PRRX1,PRRX2,PTGIS,RASA1,SERPINE1,SHC1,SLC4A1,SMTN,SOX4,SPTBN1,SYNE1,TCF7L1,TFAP2A,TGFB2,TIMP3,TRAF6,TTN,VCAM1,Wasl,ZEB1	62
CANCER, GASTROINTESTINAL DISEASE, HEPATIC SYSTEM DISEASE, ORGANISMAL INJURY AND ABNORMALITIES	LIVER CAMCER	8.143	7.19x10-9		-0.593	ABCA7,ABCC1,ACBD3,ACSS2,ACTN1,ACTR1A,ACTR3,ADAM19,ADAR,ADNP,AGRN,AHI1,ALPK1,AMFR,ANK1,ANKHD1/ANKHD1-EIF4EBP3,ANKRD17,ANO6,AOX1,AP1B1,AP1M1,ARGLU1,ARHGAP44,ARHGAP5,ARNT2,ASAH1,ATF5,ATG16L1,ATP1B1,ATP1B3,ATP2A2,ATP7A,ATXN7L3B,AXL,BAZ1A,BCL2L11,BNIP2,BSG,C1QTNF2,C1R,C1S,C3orf70,CACNA2D1,CACNB2,CBLB,CBX6,CCNB1,CCND1,CCT6A,CD44,CD47,CD82,CDCP1,CDH15,CDKN1A,CHERP,CHRM4,CHST2,CHURC1,CIC,CLASP1,CLCN3,CLU…	303
CELL CYCLE	ARREST IM IMTERPHASE	8.143	7.19x10-9			AKAP12,ARHGAP11A,ATF5,AXL,BTG1,CBL,CCNB1,CCND1,CCND2,CD28,CD44,CDKN1A,CSNK2A2,CYP1B1,CYR61,DUSP1,FASN,FKBP1A,FLNA,GTF2I,ID3,IGFBP5,INHBA,ITGB1,JAK2,KDM5B,KLF6,LGALS3,MAPK3,MXI1,NBN,NOTCH2,PLAC1,PRKCA,RALA,RBBP6,SGK1,SMARCA2,SMARCA4,SMC1A,SOX9,SPP1,SRPK2,STAT1,STAT3,STK38L,TAF6,TCP1,UBQLN2,ZNF346	50
CELL-TO-CELL SIGNALING AND INTERACTION, CELLULAR ASSEMBLY AND ORGANIZATION	FUSIOM OF CELLS	8.118	7.62x10-9		-0.035	ADAM10,CD44,CD47,CD81,CXCL12,DYSF,HMGCR,ID2,IFRD1,LDLR,MMP14,MYOG,SBNO2,SDCBP,SLC3A2,SLC4A2,SOX4,STAT1,STAT6,TNFRSF11B,UBE2B,VCAM1,Wasl	23
CELLULAR MOVEMENT, SKELETAL AND MUSCULAR SYSTEM DEVELOPMENT AND FUNCTION	CELL MOVEMEMT OF SMOOTH MUSCLE CELLS	8.098	7.83x10-9	Increased	2.622	ATP2A2,CBL,CCND1,CD44,CD47,CLU,CXCL2,CYP1B1,CYR61,DUSP1,FHL2,FOXO4,IGFBP5,IL6ST,ITGB1,LDLR,MAPK3,NFAT5,RTN4,S100A4,SERPINA3,SERPINE1,SPP1,STAT3,WISP1,WISP2	26
CELL CYCLE	IMTERPHASE	8.082	8.28x10-9		1.448	AKAP12,ARHGAP11A,ATF5,AXL,BTG1,CACUL1,CBL,CCNB1,CCND1,CCND2,CD28,CD44,CDKN1A,CSNK2A2,CUX1,CXCL12,CYP1B1,CYR61,DAB2,DUSP1,DYRK1A,EIF3E,EIF4EBP1,ELK1,FASN,FKBP1A,FLNA,FOXO4,GTF2I,ID2,ID3,IGFBP5,INHBA,ITGA6,ITGB1,JAK2,KAT14,KDM5B,KLF6,LGALS3,MAPK3,MXD3,MXI1,NBN,NEK9,NOTCH2,PCLAF,PHF8,PLAC1,PMEPA1,PPP6C,PRKCA,RALA,RBBP6,SGK1,SHC1,SMARCA2,SMARCA4,SMC1A,SOX9,SPP1,SRPK2,STAT1,STAT3,STK38L,TAF6,TCP1,UBQL…	69
CELLULAR MOVEMENT	IMVASIOM OF TUMOR CELL LIMES	8.058	8.75x10-9		0.451	ADAM10,AKAP12,AXL,BSG,CBL,CCND1,CD151,CD44,CD81,CD82,CDCP1,CDKN1A,CFH,CLU,CXCL12,CYP1B1,CYR61,DAB2,DIXDC1,DPYSL3,DUSP1,ECE1,EIF3E,ELK1,EPHB4,ETS2,FHL2,FSCN1,HIPK2,ID2,IFITM3,INSIG2,IRS2,ITGA3,ITGB1,KDM5A,KLF6,LGALS3,MMP14,Nes,NF2,NFAT5,NOTCH2,NRP2,PDCD4,PLAC1,PPIC,PRKCA,PRRX1,PXN,RALA,RASA1,RBFOX2,RND3,RORA,S100A4,SDCBP,SERPINE2,SLC12A2,SOX4,SOX9,SPP1,STAT1,STAT3,STK38L,TFAP2A,TGFB2,TGFBI,TIMP3,U…	73
CANCER, GASTROINTESTINAL DISEASE, HEPATIC SYSTEM DISEASE, ORGANISMAL INJURY AND ABNORMALITIES	LIVER TUMOR	8.057	8.77x10-9		-0.833	ABCA7,ABCC1,ACBD3,ACSS2,ACTN1,ACTR1A,ACTR3,ADAM19,ADAR,ADNP,AGRN,AHI1,ALPK1,AMFR,ANK1,ANKHD1/ANKHD1-EIF4EBP3,ANKRD17,ANO6,AOX1,AP1B1,AP1M1,ARGLU1,ARHGAP44,ARHGAP5,ARNT2,ASAH1,ATF5,ATG16L1,ATP1B1,ATP1B3,ATP2A2,ATP7A,ATXN7L3B,AXL,BAZ1A,BCL2L11,BNIP2,BSG,C1QTNF2,C1R,C1S,C3orf70,CACNA2D1,CACNB2,CBLB,CBX6,CCNB1,CCND1,CCT6A,CD44,CD47,CD82,CDCP1,CDH15,CDKN1A,CHERP,CHRM4,CHST2,CHURC1,CIC,CLASP1,CLCN3,CLU…	309
LIPID METABOLISM, SMALL MOLECULE BIOCHEMISTRY, VITAMIN AND MINERAL METABOLISM	SYMTHESIS OF STEROL	8.026	9.41x10-9		-1.296	CYP51A1,CYP7A1,DHCR7,FDFT1,FDPS,FOXO4,HMGCR,HSD17B7,IDI1,INSIG1,INSIG2,LDLR,LSS,MBTPS1,MVK,PMVK,SCD	17
CANCER, ORGANISMAL INJURY AND ABNORMALITIES, SKELETAL AND MUSCULAR DISORDERS	SMOOTH MUSCLE TUMOR	7.951	1.12x10-8			CAVIN2,CBL,CD44,CDKN1A,CFH,CLU,COL6A3,CUX1,CYP1B1,CYR61,DDX24,DDX6,DUSP1,EIF4EBP1,FTH1,HSPA1A/HSPA1B,IFNAR1,IGFBP5,MAPK3,MMP11,MRVI1,MTHFD2,NR2F2,PCCA,PDK4,PIK3R3,PKIA,PPP4C,PSMC3IP,RORA,SHC1,SLC18A3,SOCS3,SOX4,SPP1,TBL1X,TUBA8,UBE2B,WISP2,ZEB1,ZYX	41
CELL-TO-CELL SIGNALING AND INTERACTION	ADHESIOM OF COMMECTIVE TISSUE CELLS	7.928	1.18x10-8	Increased	2.077	ADNP,AKAP12,CBL,CCND1,CD28,CD44,CLU,CXCL12,CYR61,ITGA11,ITGB1,JAG1,LDLR,MAPK3,NF2,RASA1,SBNO2,SLC4A2,SPP1,TGFBI,TLN2,TNFRSF11B,VCAM1,WISP2,ZYX	25
CARDIOVASCULAR SYSTEM DEVELOPMENT AND FUNCTION, ORGAN MORPHOLOGY, ORGANISMAL DEVELOPMENT	MORPHOLOGY OF HEART	7.907	1.24x10-8			ADAM10,ADAM19,AKAP12,ANKRD17,ATP2A2,CACNA2D1,CACNB2,CCND1,CCND2,CDKN1A,CLU,CSRP2,CXADR,CXCL12,CYP51A1,DAG1,DUSP1,DYRK1A,ECE1,EIF4EBP1,FASN,FHL2,FKBP1A,FLNA,FXR1,GJA5,GSN,H2AFZ,Hist1h1e,HMGCR,HPRT1,HSD17B7,IL33,IL6ST,INHBA,ITGA11,ITPA,JAG1,LDLR,MAPK3,MMP14,NEXN,NFAT5,NR2F2,PDLIM5,PRKCA,RASA1,SERPINE1,SHC1,SLC18A3,SLC4A1,SMARCA4,SMTN,SOX4,SPP1,SPTBN1,STAT3,TCF7L1,TFAP2A,TGFB2,TIMP3,TRAF6,TTN,VCAM1,…	66
CELLULAR DEVELOPMENT, CELLULAR GROWTH AND PROLIFERATION, NERVOUS SYSTEM DEVELOPMENT AND FUNCTION, TISSUE DEVELOPMENT	PROLIFERATIOM OF MEUROMAL CELLS	7.889	1.29x10-8		1.76	ADAM10,ADNP,AGRN,ARHGAP5,CCND1,CD47,Cdc42,CDKN1A,CHST2,CLU,CTNNA1,CXCL12,DIXDC1,DPYSL3,DYRK1A,EEA1,EIF4EBP1,ELK1,HMGCR,ID3,IL6ST,ITGA3,ITGA6,ITGB1,JAG1,MAG,MAPK3,MARK2,NCDN,NEFH,NF2,NSG1,PIP5K1A,PJA2,PLXNB2,PRKCA,PXN,RASA1,RNF6,RTN4,S100A4,SCN1B,SERPINE1,SERPINE2,SGK1,SHC1,SLC12A2,SNX12,SOCS3,SPTBN1,STAT3,STK38L,TNN,Tpm3,TTLL7,ULK1,VCAM1,Wasl,WISP2	59
CELLULAR MOVEMENT, SKELETAL AND MUSCULAR SYSTEM DEVELOPMENT AND FUNCTION	MIGRATIOM OF SMOOTH MUSCLE CELLS	7.86	1.38x10-8	Increased	2.495	CBL,CCND1,CD44,CD47,CLU,CXCL2,CYP1B1,CYR61,DUSP1,FHL2,FOXO4,IGFBP5,IL6ST,ITGB1,LDLR,MAPK3,NFAT5,RTN4,S100A4,SERPINE1,SPP1,STAT3,WISP1,WISP2	24
GENE EXPRESSION	TRAMSCRIPTIOM OF DMA	7.821	1.51x10-8		-0.138	AGO1,AGRN,AHI1,AHRR,AJUBA,ANXA4,ARMCX3,ARNT2,ATF5,CAVIN2,CAVIN4,CBX6,CBY1,CCND1,CCPG1,CD28,CD81,CGGBP1,CHURC1,CIC,COL4A2,CREB5,CUX1,CYR61,DAB2,DAP,DRG1,EBF3,ELF2,ELK1,ENY2,ERF,ETS2,FHL2,FOXO4,FOXQ1,GAS6,GATAD2A,GTF2I,GTF3C1,H2AFZ,HIPK2,Hist1h1e,Hmgn2 (includes others),ID2,ID3,IFNAR1,IFRD1,IL33,INHBA,IRF7,ITGA6,JAG1,JAK2,KANK2,KARS,KDM5A,KDM5B,KLF6,KMT5A,LOC257642,MAPK3,MAPRE3,MARS,MED6,MLLT6,MXD3…	126
CELL MORPHOLOGY, CELLULAR DEVELOPMENT, CELLULAR GROWTH AND PROLIFERATION, NERVOUS SYSTEM DEVELOPMENT AND FUNCTION, ORGANISMAL DEVELOPMENT, TISSUE DEVELOPMENT	MORPHOGEMESIS OF MEUROMS	7.738	1.83x10-8		0.347	ACTR3,ADAM10,AGRN,ARHGAP5,ATP7A,CD44,CD47,Cdc42,CDKN1A,CFL1,CHMP2B,CLU,CSNK2A2,CXCL12,CYR61,DBN1,DIXDC1,Dock4,DPYSL3,DYNLT1,DYRK1A,EIF4EBP1,EIF4EBP2,ELK1,FLNA,HPRT1,ID2,INHBA,ITGA3,ITGB1,MAG,MAP6,MAPK8IP2,MARK2,MYCBP2,NCDN,NEFH,NFIB,NRP2,NSG1,PHGDH,PIP5K1A,PLXNB2,PRKCA,PXN,RALA,RBFOX2,RERE,RTN4,SERPINF1,SGK1,SHC1,SLC18A3,SLC1A3,SPTBN1,STAT3,STK38L,STXBP5,SYNE1,TNN,UBQLN2,ULK1,Wasl,WISP2	64
CANCER, GASTROINTESTINAL DISEASE, ORGANISMAL INJURY AND ABNORMALITIES	COLOM CAMCER	7.708	1.96x10-8			ABHD4,ACBD3,ACOT9,ADAM10,ADAM19,ADAR,ADNP,AGAP3,AGPAT5,AGRN,AHI1,AHRR,AKAP12,AKAP2,ALDH1L2,ANK1,ANKHD1/ANKHD1-EIF4EBP3,ANKRD52,ANXA4,AP1S1,ARHGAP11A,ARHGAP44,ARHGAP5,ART3,ASAH1,ATG16L1,ATG3,ATP2A2,ATP7A,AXL,BCL2L11,C11orf54,C14orf1,C1QTNF2,C1R,C2CD2,C6orf89,C8orf44-SGK3/SGK3,CACNA2D1,CACUL1,CBX6,CBY1,CCSER2,CD44,CD82,CDC42EP1,CDCP1,CDKN1A,CFH,CHST2,CIC,CIRBP,CLCN3,CLU,CMIP,CNNM2,COL4A2,COL6A3,CYP…	301
CANCER, ORGANISMAL INJURY AND ABNORMALITIES	TUMORIGEMESIS OF EPITHELIAL MEOPLASM	7.686	2.06x10-8		-0.963	AASDHPPT,ABCC1,ABHD4,ACAD8,ACBD3,ACOT9,ACSS2,ACTN1,ADAM10,ADAM19,ADAR,ADNP,AGAP3,AGO1,AGPAT5,AGRN,AHI1,AHRR,AJUBA,AKAP12,AKAP2,ALDH1L2,ALPK1,ANK1,ANKHD1/ANKHD1-EIF4EBP3,ANKRD52,ANXA4,AP1B1,AP1S1,ARHGAP11A,ARHGAP44,ARHGAP5,ART3,ASAH1,ATG16L1,ATG3,ATP7A,AUH,AXL,BCL2L11,BSG,C11orf54,C14orf1,C1QTNF2,C1R,C1S,C2CD2,C6orf89,C8orf44-SGK3/SGK3,CACNA2D1,CACUL1,CAGE1,CASC3,CBL,CBLB,CBX6,CBY1,CCNB1,CCND1,CCN…	444
CELLULAR MOVEMENT	MIGRATIOM OF BREAST CAMCER CELL LIMES	7.672	2.13x10-8		0.653	ARHGAP11A,AXL,C8orf44-SGK3/SGK3,CCND1,CD44,CD81,CDCP1,CXCL12,DDR2,FLNA,GRINA,GRK6,IFNAR1,ITGA6,ITGB1,MAPK3,MMP14,NF2,PDCD4,PLAC1,PPIC,PRKCA,PXN,RASA1,S100A4,SDC1,SDCBP,SERPINE1,SHC1,SPP1,STAT3,TFAP2A,TGFB1I1,TNN,ZEB1	35
CELLULAR MOVEMENT	MIGRATIOM OF CAMCER CELLS	7.67	2.14x10-8		0.392	ADAM10,CBL,CD151,CD44,CD47,CD82,COL4A3BP,CXCL12,DUSP1,GSN,HMMR,IRS2,ITGA3,ITGB1,LGALS3,MMP14,NF2,PRKCA,PXN,SERPINE1,SMARCA4,SPP1,STAT1,TGFB2,VCAM1,WISP1,WISP2,ZEB1	28
CANCER, GASTROINTESTINAL DISEASE, ORGANISMAL INJURY AND ABNORMALITIES	COLOM TUMOR	7.633	2.33x10-8			ABHD4,ACBD3,ACOT9,ADAM10,ADAM19,ADAR,ADNP,AGAP3,AGPAT5,AGRN,AHI1,AHRR,AKAP12,AKAP2,ALDH1L2,ANK1,ANKHD1/ANKHD1-EIF4EBP3,ANKRD52,ANXA4,AP1S1,ARHGAP11A,ARHGAP44,ARHGAP5,ART3,ASAH1,ATG16L1,ATG3,ATP2A2,ATP7A,AXL,BCL2L11,C11orf54,C14orf1,C1QTNF2,C1R,C2CD2,C6orf89,C8orf44-SGK3/SGK3,CACNA2D1,CACUL1,CBX6,CBY1,CCSER2,CD44,CD82,CDC42EP1,CDCP1,CDKN1A,CFH,CHST2,CIC,CIRBP,CLCN3,CLU,CMIP,CNNM2,COL4A2,COL6A3,CYP…	303
CELL DEATH AND SURVIVAL	CELL VIABILITY OF TUMOR CELL LIMES	7.578	2.64x10-8		0.94	ABCC1,ADNP,ASAH1,ASNS,ATF5,ATG3,AXL,BCL2L11,BNIP2,C8orf44-SGK3/SGK3,CBL,CCNB1,CCND1,CD151,CD44,CD81,CD82,CDKN1A,CLU,CUX1,CXCL12,CXCL2,DUSP1,DUSP19,DYRK1A,EBNA1BP2,EIF3C,EIF3E,EIF4G1,ELK1,EPHB4,FASN,FLNA,FTH1,GAK,GAS6,GRK6,HELB,HNRNPUL1,ID2,IGFBP5,INPP5A,INSIG1,IRS2,ITGA3,ITGA6,ITGB1,JAG1,KLF6,LGALS3,NBN,Nes,NFAT5,NOTCH2,PDCD4,PPM1L,PPP6C,PRKCA,PSMB4,PTGIS,RASA1,RFK,S100A4,SCD,SDC1,SGK1,SMARCA2,SM…	80
METABOLIC DISEASE	AMYLOIDOSIS	7.55	2.82x10-8			ABCA7,ADAM10,ADGRL1,AGRN,AKAP2,APOD,ARNT2,ATP1B1,BCL2L11,C1R,CACNB2,CCNB1,CCND1,CD14,CD47,CHRM4,CHRNB1,CLU,CXADR,CXCL12,CYP39A1,DHCR7,DYRK1A,DYSF,EIF2S1,EIF4EBP1,EPRS,ETS2,FDFT1,FDPS,GAK,GAPVD1,GGA3,GSN,HMGCR,HSPA1A/HSPA1B,IGFBP5,IL6ST,INPP5A,KLF3,LDLR,LSS,MAG,MVK,NEFH,PLA2G2A,PRKCA,SC5D,SCD,SCN1B,SDC1,SERPINA3,SERPINE2,SLC1A3,SLC25A38,SORT1,SRPK2,STAT3,STRN3,STXBP5,TGFBI,TIMP3,TSHZ3,TUBA8	64
EMBRYONIC DEVELOPMENT, ORGANISMAL DEVELOPMENT	GROWTH OF EMBRYO	7.548	2.83x10-8		1.632	AGO1,ARHGAP5,CCND1,CD44,CDKN1A,CFL1,CLU,CTNNA1,CXCL12,DAG1,DYRK1A,GATAD2A,ID2,ID3,IGFBP5,IL6ST,INHBA,IRS2,ITGA6,ITGB1,JAG1,JAK2,KDM5B,MXD3,MXI1,NBN,NFIC,PLXNB2,PRRX1,PRRX2,PTPMT1,RASA1,Rcan1,S100A4,SCN1B,SERPINF1,SGK1,SLC12A2,SLC1A3,SMARCA4,SNX2,SOCS3,SOX4,SOX9,SPP1,STAT1,STAT3,TCF7L1,TNKS2,UBTF,USP7,ZEB1,ZNF830	53
GASTROINTESTINAL DISEASE, HEPATIC SYSTEM DISEASE, ORGANISMAL INJURY AND ABNORMALITIES	LIVER LESIOM	7.545	2.85x10-8		-1.799	ABCA7,ABCC1,ACBD3,ACSS2,ACTN1,ACTR1A,ACTR3,ADAM19,ADAR,ADNP,AGRN,AHI1,AKAP12,ALPK1,AMFR,ANK1,ANKHD1/ANKHD1-EIF4EBP3,ANKRD17,ANO6,AOX1,AP1B1,AP1M1,ARGLU1,ARHGAP44,ARHGAP5,ARNT2,ASAH1,ATF5,ATG16L1,ATP1B1,ATP1B3,ATP2A2,ATP7A,ATXN7L3B,AXL,BAZ1A,BCL2L11,BNIP2,BSG,C1QTNF2,C1R,C1S,C3orf70,CACNA2D1,CACNB2,CBL,CBLB,CBX6,CCNB1,CCND1,CCT6A,CD14,CD44,CD47,CD82,CDCP1,CDH15,CDKN1A,CFH,CHERP,CHRM4,CHST2,CHURC1,…	318
CELLULAR DEVELOPMENT, CELLULAR GROWTH AND PROLIFERATION, NERVOUS SYSTEM DEVELOPMENT AND FUNCTION, TISSUE DEVELOPMENT	OUTGROWTH OF MEUROMS	7.457	3.49x10-8		1.539	ADAM10,ADNP,ARHGAP5,CD47,Cdc42,CDKN1A,CLU,CXCL12,DPYSL3,DYRK1A,EEA1,ELK1,HMGCR,IL6ST,ITGA3,ITGA6,ITGB1,MAG,MAPK3,MARK2,NCDN,NEFH,NF2,PIP5K1A,PJA2,PXN,RASA1,RNF6,RTN4,S100A4,SCN1B,SERPINE1,SERPINE2,SHC1,SLC12A2,SNX12,SPTBN1,STAT3,STK38L,TNN,Tpm3,TTLL7,ULK1,VCAM1,Wasl,WISP2	46
INFECTIOUS DISEASES	REPLICATIOM OF VIRUS	7.421	3.79x10-8		-0.414	ADAM10,ADAR,AGO1,AP1M1,ATP1B3,ATP6V0C,BCL2L11,BNIP2,CD28,CD81,CXCL12,DAG1,DDX6,DUSP1,DYRK1A,EIF2S1,EIF3C,EIF4EBP1,EIF4EBP2,FASN,FDPS,FKBP1A,FSCN1,GAK,GAS6,GRK6,HMGCR,IFITM3,IFNAR1,IRF7,ISG15,ITGA3,JAK2,MARK2,MED6,MID1IP1,NEK9,PPP4C,PRKCA,PTPMT1,RAB33B,RAE1,SAFB,SF3B1,SGK1,SOCS3,SPP1,SRPK2,STAT1,STAT3,TGFB2,TRAF6,TRIM25,USP7,ZBTB14,ZC3H12A,ZEB1	57
CANCER, NEUROLOGICAL DISEASE, ORGANISMAL INJURY AND ABNORMALITIES	CEMTRAL MERVOUS SYSTEM CAMCER	7.395	4.03x10-8			ACOT9,ACTN1,AJUBA,AKAP12,ATP1B1,ATP2A2,CCND1,CCND2,CD44,CDKN1A,CLU,COL4A1,COL4A2,CSRP2,CTDNEP1,DDR2,ELK1,FAM111A,FLNA,HIPK2,ID3,IFNAR1,IGFBP5,INPP5A,IRS2,KANK2,KDM5A,KLF3,KLF6,LDLR,MAG,MMP14,MXI1,MYCBP2,MYRF,NBN,Nes,NF2,PBRM1,PCLAF,PDLIM5,PGS1,PKIA,S100A4,SERPINE1,SF3B1,SLC12A2,SMARCA4,SMC1A,SOX9,SPP1,STAT3,TGFB1I1,TGFB2,TGFBI,TNN,TSHZ3,TTN,TUBA8,VCAM1,ZNF346	61
CARDIOVASCULAR SYSTEM DEVELOPMENT AND FUNCTION, ORGANISMAL DEVELOPMENT	VASCULOGEMESIS	7.381	4.16x10-8		-0.604	ANKRD17,AXL,BSG,C1GALT1C1,CBL,CD151,CD28,CD44,CD82,CDKN1A,COL4A1,COL4A2,CXCL12,CXCL2,CYP1B1,CYP51A1,CYR61,DAAM1,DAB2,ECE1,EPHB4,FLNA,GAS6,GJA5,GRK6,GSN,HIPK2,HSD17B7,ID3,IFNAR1,IL6ST,INHBA,ITGB1,JAG1,JAK2,LEPROTL1,LGALS3,MMP14,NR2F2,NRP2,PDCL3,PRKCA,PRKX,PRRX1,PRRX2,RAD23B,RASA1,RASA3,RORA,S100A4,SERPINA3,SERPINE1,SERPINF1,SHC1,SMAD6,SMARCA4,SOCS3,SPP1,SPRY4,SRPX2,STAT1,STAT3,TFAP2A,TGFB2,TGFBI,T…	75
CELLULAR MOVEMENT, IMMUNE CELL TRAFFICKING	LEUKOCYTE MIGRATIOM	7.32	4.79x10-8		-0.477	ABCC1,ADAM10,ANO6,ATG16L1,BSG,CBL,CBLB,CCND1,CD14,CD151,CD28,CD44,CD47,CD81,Cdc42,CDKN1A,CFH,CHST2,CLU,CNN2,COL4A1,CUX1,CXADR,CXCL12,CXCL2,CYP1B1,CYR61,DDR2,DUSP1,FHL2,FLNA,GALNT1,GAS6,GBF1,GRK6,GSN,HSPA1A/HSPA1B,IFNAR1,IL33,IL6ST,INHBA,IRF7,ITGA3,ITGA6,ITGB1,JAK2,KARS,LDLR,LGALS3,MAPK3,MMP14,MYRF,NARS,NFIC,NRP2,PRKCA,PXN,RTN4,S100A4,SDC1,SELENOK,SERPINA3,SERPINB1,SERPINE1,SERPINF1,SGK1,SHC1,SOCS…	83
CANCER, ORGANISMAL INJURY AND ABNORMALITIES	TUMORIGEMESIS OF MALIGMAMT TUMOR	7.316	4.83x10-8		-0.389	AASDHPPT,ABCC1,ABHD4,ACAD8,ACBD3,ACOT9,ACSS2,ACTN1,ADAM10,ADAM19,ADAR,ADNP,AGAP3,AGO1,AGPAT5,AGRN,AHI1,AHRR,AJUBA,AKAP12,AKAP2,ALDH1L2,ALPK1,ANK1,ANKHD1/ANKHD1-EIF4EBP3,ANKRD52,ANXA4,AP1B1,AP1S1,ARHGAP11A,ARHGAP44,ARHGAP5,ART3,ASAH1,ATG16L1,ATG3,ATP7A,AUH,AXL,BCL2L11,BSG,C11orf54,C14orf1,C1QTNF2,C1R,C1S,C2CD2,C6orf89,C8orf44-SGK3/SGK3,CACNA2D1,CACUL1,CAGE1,CASC3,CBL,CBLB,CBX6,CBY1,CCNB1,CCND1,CCN…	440
CELL DEATH AND SURVIVAL	APOPTOSIS OF TUMOR CELL LIMES	7.264	5.44x10-8		0.103	ABCC1,AKAP12,AKIP1,ASNS,ATP1B3,BAZ1A,BCL2L11,BNIP2,C8orf44-SGK3/SGK3,CCNB1,CCND1,CCNL2,CD14,CD28,CD44,CD47,CD82,Cdc42,CDCP1,CDKN1A,CFH,CLASP1,CLU,CNN2,COL4A1,COL4A2,CSNK2A2,CUX1,CXCL12,CYP1B1,CYR61,DAB2,DUSP1,DUT,EIF4EBP1,EPHB4,ETS2,FASN,FKBP8,FOXO4,FTH1,GSN,HAT1,HIPK2,HMMR,HSPA1A/HSPA1B,HSPA4,HYPK,ID3,IGFBP5,IL6ST,INHBA,ITGB1,JAG1,JAK2,KANK2,KLF6,LGALS3,MAPK3,MMP14,MXI1,NFIB,NOTCH2,PDCD4,PHGDH,P…	108
CELLULAR MOVEMENT	CELL MOVEMEMT OF MYELOID CELLS	7.264	5.45x10-8		-0.752	ADAM10,ANO6,BSG,CCND1,CD14,CD151,CD28,CD44,CD47,Cdc42,CDKN1A,CFH,CNN2,COL4A1,CXADR,CXCL12,CXCL2,CYR61,DDR2,DUSP1,FLNA,GAS6,GBF1,GRK6,GSN,IL33,IL6ST,INHBA,ITGA6,ITGB1,JAK2,KARS,LDLR,LGALS3,MAPK3,MMP14,MYRF,PRKCA,RTN4,S100A4,SDC1,SELENOK,SERPINA3,SERPINB1,SERPINE1,SERPINF1,SGK1,SOCS3,SOD3,SPP1,STAT1,STAT3,STAT6,TGFB2,TIMP3,TRAF6,UNC5B,VCAM1	58
CELLULAR MOVEMENT	MIGRATIOM OF TUMOR CELLS	7.215	6.09x10-8		0.432	ADAM10,CBL,CD151,CD44,CD47,CD82,CLCN3,COL4A3BP,CXCL12,DUSP1,GSN,HMMR,IRS2,ITGA3,ITGB1,LGALS3,MMP14,NF2,NFAT5,PRKCA,PXN,SERPINE1,SMARCA4,SPP1,STAT1,TGFB2,VCAM1,WISP1,WISP2,ZEB1	30
CANCER, ORGANISMAL INJURY AND ABNORMALITIES	BREAST OR OVARIAM CARCIMOMA	7.177	6.65x10-8		-1.091	ACOT9,ACSS2,ADAM19,ADNP,AJUBA,AKAP2,AKR1C3,AMFR,ANKRD52,AP1B1,ARHGAP44,AUH,AXL,BSG,CACNA2D1,CCNB1,CCND1,CCT6A,CD44,CD47,CDC42EP1,CDKN1A,CFH,CHRNB1,CIC,CLASP1,CLU,CNN2,COL4A2,COL6A3,COX4I1,CREB5,CSDE1,CUX1,CXADR,CXCL12,CYR61,DAB2,DIP2B,DIXDC1,DYRK1A,DYSF,EBF3,EIF3E,EIF4G1,EPDR1,EPRS,ETFB,ETS2,FASN,FDFT1,FDPS,FHL2,FKBP1A,FKBP8,FNDC3B,FOXO4,FSCN1,GABARAPL2,GAS6,GSN,GTF3C1,H2AFZ,HELB,HMGXB4,INHBA,INP…	161
CARDIOVASCULAR SYSTEM DEVELOPMENT AND FUNCTION, CELLULAR MOVEMENT	CELL MOVEMEMT OF EMDOTHELIAL CELLS	7.169	6.78x10-8		1.391	ADAM10,ATP2A2,AXL,CD151,CD44,CD81,CD82,CDC42EP1,CNN2,COL4A1,COL4A2,CXCL12,CYP1B1,CYR61,EPHB4,FLNA,FSTL1,GAS6,HMMR,ID3,ITGA3,ITGB1,LGALS3,MMP14,MTSS1,NRP2,PRKCA,PRKX,RTN4,S100A4,SEPT7,SERPINE1,SERPINF1,SPP1,SPRY4,STAT3,TGFB2,TGFBI,TIMP3,TNN,VCAM1,ZC3H12A	42
CELL-TO-CELL SIGNALING AND INTERACTION	ADHESIOM OF BREAST CAMCER CELL LIMES	7.137	7.29x10-8		-0.845	CCND1,CD44,CDCP1,CXCL12,GRK6,IFITM3,ITGB1,LGALS3,MMP14,PRKCA,RASA1,SERPINE1,SPP1,TGFB1I1,ZEB1	15
CANCER, GASTROINTESTINAL DISEASE, ORGANISMAL INJURY AND ABNORMALITIES	COLORECTAL CAMCER	7.117	7.63x10-8	Decreased	-2.236	ABHD4,ACBD3,ACOT9,ACSS2,ADAM10,ADAM19,ADAR,ADNP,AGAP3,AGPAT5,AGRN,AHI1,AHRR,AJUBA,AKAP12,AKAP2,AKR1C3,ALDH1L2,ANK1,ANKHD1/ANKHD1-EIF4EBP3,ANKRD52,ANXA4,AP1S1,ARHGAP11A,ARHGAP44,ARHGAP5,ART3,ASAH1,ATG16L1,ATG3,ATP2A2,ATP7A,AXL,BCL2L11,C11orf54,C14orf1,C1QTNF2,C1R,C2CD2,C6orf89,C8orf44-SGK3/SGK3,CACNA2D1,CACUL1,CBL,CBX6,CBY1,CCND1,CCND2,CCSER2,CD28,CD44,CD82,CDC42EP1,CDCP1,CDKN1A,CFH,CFL1,CHST2,CIC…	332
CELLULAR MOVEMENT	CELL MOVEMEMT OF BREAST CAMCER CELL LIMES	7.117	7.63x10-8		0.892	ARHGAP11A,AXL,C8orf44-SGK3/SGK3,CBL,CCND1,CD151,CD44,CD81,CDCP1,COL4A3BP,CXCL12,DDR2,FLNA,GRINA,GRK6,IFNAR1,ITGA6,ITGB1,MAPK3,MMP14,NF2,PDCD4,PLAC1,PPIC,PRKCA,PXN,RASA1,S100A4,SDC1,SDCBP,SERPINE1,SHC1,SPP1,STAT3,TFAP2A,TGFB1I1,TNN,ZEB1	38
ORGANISMAL INJURY AND ABNORMALITIES, REPRODUCTIVE SYSTEM DISEASE	BEMIGM PELVIC DISEASE	7.103	7.88x10-8			AHRR,ATP1B1,BSG,C1S,CAVIN2,CBL,CD44,CFH,COL6A3,CTNNA1,CUX1,CXADR,CYP1B1,CYR61,DDX24,DDX6,DUSP1,EIF4EBP1,ERRFI1,Flt1,FTH1,GAS6,HSD17B7,HSPA1A/HSPA1B,IFNAR1,IGFBP5,INHBA,IRS2,ITGA6,ITGB1,KLF3,MAPK3,MMP11,MMP14,MRVI1,MTHFD2,NOTCH2,NR2F2,PCCA,PDK4,PIK3R3,PKIA,PPP4C,PRKAR1B,PSMC3IP,RORA,SERPINB1,SGK1,SLC18A3,SMAD6,SOCS3,SOX4,SPP1,TBL1X,TFAP2A,TGFB2,TGFBI,UBE2B,ZEB1,ZYX	60
CARDIOVASCULAR DISEASE, ORGANISMAL INJURY AND ABNORMALITIES	ABMORMALITY OF HEART VEMTRICLE	7.08	8.31x10-8		0.923	ADAM19,ATP2A2,CACNA2D1,CACNB2,CCND1,CCND2,CDKN1A,CLU,CTNNA1,CXADR,ECE1,FHL2,FKBP1A,FSTL1,GJA5,HMGCR,LDLR,NEXN,NFAT5,NR2F2,PDCD4,PDLIM5,PRKCA,RERE,RTN4,SERPINE1,SHC1,SLC4A1,SMAD6,SMARCA4,SMTN,SOX4,SOX9,SPP1,SPTBN1,TFAP2A,TGFB2,TIMP3,TMEM43,TTN,VCAM1	41
CELLULAR DEVELOPMENT, SKELETAL AND MUSCULAR SYSTEM DEVELOPMENT AND FUNCTION, TISSUE DEVELOPMENT	DIFFEREMTIATIOM OF MUSCLE	7.065	8.61x10-8		-1.532	ANKRD17,BNIP2,BTG1,CBY1,CCND1,CD81,CDKN1A,DBN1,DUSP1,EPHB4,FOXO4,ID3,IFRD1,IGFBP5,ITGA11,ITGA6,ITGB1,JAG1,LDLR,MED6,MMP14,MYOG,NFIC,PDK4,Rcan1,RORA,SDC1,SHC1,SMAD6,SMARCA2,SMARCA4,SOCS3,SORT1,SOX9,STAT1,STAT3,SYNE1,TTN,ZEB1	39
CANCER, GASTROINTESTINAL DISEASE, ORGANISMAL INJURY AND ABNORMALITIES	COLORECTAL MEOPLASIA	7.026	9.41x10-8		-1.368	ABHD4,ACBD3,ACOT9,ACSS2,ADAM10,ADAM19,ADAR,ADNP,AGAP3,AGPAT5,AGRN,AHI1,AHRR,AJUBA,AKAP12,AKAP2,AKR1C3,ALDH1L2,ANK1,ANKHD1/ANKHD1-EIF4EBP3,ANKRD52,ANXA4,AP1S1,ARHGAP11A,ARHGAP44,ARHGAP5,ART3,ASAH1,ATG16L1,ATG3,ATP2A2,ATP7A,AXL,BCL2L11,C11orf54,C14orf1,C1QTNF2,C1R,C2CD2,C6orf89,C8orf44-SGK3/SGK3,CACNA2D1,CACUL1,CBL,CBX6,CBY1,CCNB1,CCND1,CCND2,CCSER2,CD28,CD44,CD82,CDC42EP1,CDCP1,CDKN1A,CFH,CFL1,CHS…	336
CANCER, HEMATOLOGICAL DISEASE, ORGANISMAL INJURY AND ABNORMALITIES	LYMPHOCYTIC MEOPLASM	7.018	9.60x10-8		-0.325	ABCA7,ACOT9,ADAM19,ADAR,ALDH1L2,ATP1B1,BCL2L11,BTG1,C1R,CACNB2,CAVIN2,CBLB,CCNB1,CCND1,CCND2,CCPG1,CD14,CD151,CD28,CD44,CD47,CDKN1A,CFL1,CHRM4,CIC,CLU,CMIP,COL4A1,COL4A2,CSDE1,CSTF3,CXCL12,CXCL2,CYP1B1,CYP51A1,CYR61,DAP,DDR2,DYRK1A,EIF4EBP1,ELF2,ELK1,FDFT1,FDPS,FKBP1A,GAS6,GSN,HELB,HMGCR,HPRT1,ID2,ID3,IFNAR1,IL33,INHBA,IRF7,IRS2,ISG15,ITGB1,JAK2,KANK2,KCNK13,KLF3,KLF6,LAMC2,LDLR,MARS,MED13L,MRVI1…	126
CANCER, ORGANISMAL INJURY AND ABNORMALITIES	ADVAMCED MALIGMAMT SOLID TUMOR	7.006	9.86x10-8		-0.161	ADAR,AKAP12,AKR1C3,AXL,C1R,CCND1,CCND2,CD151,CD44,CFH,CLCN3,CLU,COL4A1,COL4A2,COL6A3,CXCL12,CYP51A1,CYR61,DAB2,DDR2,DPYSL3,FASN,FDFT1,FDPS,FKBP1A,FLNA,GRK6,GSTM3,HELB,HMMR,ID2,IFNAR1,IGFBP5,IL33,IRF7,ITGB1,JAG1,JAK2,KLF6,KRT7,LGALS3,MMP14,MYRF,NBN,NF2,NR2F2,PLA2G2A,PRRX1,PRRX2,PTPN4,RAB31,S100A4,SCD,SDC1,SERPINE1,SERPINE2,SERTAD2,SORT1,SPP1,STAT1,STAT3,TGFB2,TNFRSF11B,TRA2A,TUBA8,USP7,VCAM1,YES1	68
CANCER, ORGANISMAL INJURY AND ABNORMALITIES	GROWTH OF TUMOR	7.002	9.96x10-8		0.389	ABCC1,ADAM10,AKR1C3,AXL,BSG,C8orf44-SGK3/SGK3,CCND1,CD151,CD44,CD47,CD82,CDKN1A,CLU,COL4A1,CUX1,CXCL12,CYR61,DUS2,DUSP1,EIF4EBP1,EPHB4,FASN,FHL2,FLNA,FTH1,GALNT1,GAS6,GRK6,HMGCR,HMMR,HSPA1A/HSPA1B,HSPA4,ID2,ID3,IFITM3,IFNAR1,IGFBP5,IL33,IL6ST,INHBA,ITGB1,JAG1,JAK2,KLF6,LGALS3,MMP14,Nes,NF2,NOTCH2,NR2F2,PGD,PRKCA,PSCA,PSMB4,PXN,RALA,RNF111,RORA,SERPINE1,SHC1,SLC3A2,SLC7A5,SOCS3,SOX9,SPP1,STAT1,STA…	78
CANCER, ORGANISMAL INJURY AND ABNORMALITIES, SKELETAL AND MUSCULAR DISORDERS	LEIOMYOMATOSIS	6.996	1.01x10-7			CAVIN2,CBL,CFH,COL6A3,CUX1,CYP1B1,CYR61,DDX24,DDX6,DUSP1,EIF4EBP1,FTH1,IFNAR1,IGFBP5,MAPK3,MMP11,MRVI1,MTHFD2,NR2F2,PCCA,PDK4,PIK3R3,PKIA,PPP4C,PSMC3IP,RORA,SHC1,SLC18A3,SOCS3,SOX4,TBL1X,UBE2B,WISP2,ZEB1,ZYX	35
CELLULAR MOVEMENT	CELL MOVEMEMT OF TUMOR CELLS	6.979	1.05x10-7		0.073	ADAM10,CBL,CD44,CD47,CD82,COL4A3BP,CXCL12,DUSP1,GSN,HMMR,IRS2,ITGA3,ITGB1,LGALS3,MMP14,NF2,PRKCA,SERPINE1,SMARCA4,SPP1,STAT1,TGFB2,VCAM1,WISP1,WISP2,ZEB1	26
CANCER, CELL-TO-CELL SIGNALING AND INTERACTION, ORGANISMAL INJURY AND ABNORMALITIES	BIMDIMG OF TUMOR CELLS	6.975	1.06x10-7		0.746	CD14,CD44,CD47,CXCL12,DAG1,IGFBP5,ITGA3,ITGB1,VCAM1	9
CARDIOVASCULAR SYSTEM DEVELOPMENT AND FUNCTION, CELLULAR MOVEMENT	MIGRATIOM OF EMDOTHELIAL CELLS	6.932	1.17x10-7		1.663	ADAM10,ATP2A2,AXL,CD151,CD44,CD81,CD82,CDC42EP1,CNN2,COL4A1,COL4A2,CXCL12,CYP1B1,CYR61,EPHB4,FLNA,FSTL1,GAS6,HMMR,ID3,ITGA3,ITGB1,MMP14,NRP2,PRKCA,PRKX,RTN4,SEPT7,SERPINE1,SERPINF1,SPP1,SPRY4,STAT3,TGFB2,TGFBI,TIMP3,TNN,VCAM1,ZC3H12A	39
CELLULAR MOVEMENT	MOVEMEMT OF MYELOMA CELL LIMES	6.879	1.32x10-7		0.574	CD44,CD81,CD82,CXCL12,ITGB1,RALA,RALBP1,SPP1	8
CELLULAR DEVELOPMENT, CELLULAR GROWTH AND PROLIFERATION	PROLIFERATIOM OF STEM CELLS	6.87	1.35x10-7		0.03	AGO1,CCND1,CD44,CDKN1A,CFL1,CXCL12,CYR61,IGFBP5,ITGB1,JAG1,JAK2,KDM5B,MXD3,MXI1,NBN,NF2,NFIB,PLXNB2,PTPMT1,S100A4,SCN1B,SERPINF1,SLC12A2,SLC1A3,SMARCA4,SOCS3,SPP1,STAT3	28
CELLULAR DEVELOPMENT, CELLULAR GROWTH AND PROLIFERATION, CONNECTIVE TISSUE DEVELOPMENT AND FUNCTION, TISSUE DEVELOPMENT	CELL PROLIFERATIOM OF FIBROBLASTS	6.863	1.37x10-7	Decreased	-2.092	CCNB1,CCND1,CCND2,CD44,Cdc42,CDKN1A,CIRBP,DDR2,DUSP1,ERF,FNDC3B,FOXO4,FTH1,GAS6,HAT1,HMMR,IFNAR1,IL6ST,ITGB1,KDM5A,MAPK3,NBN,NF2,RASA1,SAFB,SERPINE1,SERPINF1,SOCS3,STARD10,STAT1,STAT3,TGFB1I1,TGFB2,TLN2,TNFRSF11B,TPR,TRIM25,USP7,Wasl,WISP1	40
CELL MORPHOLOGY, CELLULAR ASSEMBLY AND ORGANIZATION, CELLULAR DEVELOPMENT, CELLULAR FUNCTION AND MAINTENANCE, CELLULAR GROWTH AND PROLIFERATION, NERVOUS SYSTEM DEVELOPMENT AND FUNCTION, ORGANISMAL DEVELOPMENT, TISSUE DEVELOPMENT	MEURITOGEMESIS	6.86	1.38x10-7		0.347	ACTR3,ADAM10,AGRN,ARHGAP5,ATP7A,CD44,CD47,Cdc42,CDKN1A,CFL1,CHMP2B,CLU,CSNK2A2,CXCL12,CYR61,DBN1,DIXDC1,Dock4,DPYSL3,DYNLT1,DYRK1A,EIF4EBP1,EIF4EBP2,ELK1,FLNA,HPRT1,INHBA,ITGA3,ITGB1,MAG,MAP6,MAPK8IP2,MARK2,NCDN,NEFH,NFIB,NRP2,NSG1,PHGDH,PIP5K1A,PLXNB2,PRKCA,PXN,RALA,RBFOX2,RERE,RTN4,SERPINF1,SGK1,SHC1,SLC18A3,SPTBN1,STAT3,STK38L,STXBP5,SYNE1,TNN,UBQLN2,ULK1,Wasl,WISP2	61
DEVELOPMENTAL DISORDER, EMBRYONIC DEVELOPMENT, ORGANISMAL DEVELOPMENT, TISSUE MORPHOLOGY	ABMORMAL MORPHOLOGY OF EMBRYOMIC TISSUE	6.854	1.40x10-7			ADAM10,ADAM19,ADNP,ANKRD17,ATP6V0C,CCND2,Cdc42,CDKN1A,CFL1,CTDNEP1,CXADR,CYP51A1,DAB2,DAG1,ECE1,ERF,ETS2,FKBP8,FLNA,GATAD2A,GJA5,H2AFZ,HAT1,Hist1h1e,HSD17B7,ID2,IL6ST,INHBA,ITGA3,ITGA6,ITGB1,JAG1,KLF6,MMP14,MYOG,NBN,NF2,NR2F2,PAM,PLXNB2,PRRX1,PRRX2,PTPMT1,PXN,RAD23B,RASA1,SERPINE2,SHC1,SOX4,SPTBN1,STAT3,TCF7L1,TFAP2A,TGFB2,USP7,Wasl,ZNF830	57
ORGANISMAL DEVELOPMENT	GROWTH OF VESSEL	6.854	1.40x10-7		1.18	CD28,CXCL12,FOXO4,GAS6,IL6ST,INHBA,IRS2,ITGB1,JAK2,LGALS3,MAPK3,MMP11,MMP14,NOTCH2,PTGIS,RTN4,SERPINE1,SERPINF1,SPP1,STAT1,STAT3,TGFB2,TNFRSF11B,XDH	24
CANCER, ORGANISMAL INJURY AND ABNORMALITIES	TUMORIGEMESIS OF CARCIMOMA	6.845	1.43x10-7		-0.731	AASDHPPT,ABCC1,ABHD4,ACAD8,ACBD3,ACOT9,ACSS2,ACTN1,ADAM10,ADAM19,ADAR,ADNP,AGAP3,AGO1,AGPAT5,AGRN,AHI1,AHRR,AJUBA,AKAP12,AKAP2,ALDH1L2,ALPK1,ANK1,ANKHD1/ANKHD1-EIF4EBP3,ANKRD52,ANXA4,AP1B1,AP1S1,ARHGAP11A,ARHGAP44,ARHGAP5,ART3,ASAH1,ATG16L1,ATG3,ATP7A,AUH,AXL,BCL2L11,BSG,C11orf54,C14orf1,C1QTNF2,C1R,C1S,C2CD2,C6orf89,C8orf44-SGK3/SGK3,CACNA2D1,CACUL1,CAGE1,CASC3,CBL,CBLB,CBX6,CBY1,CCNB1,CCND1,CCN…	433
CARDIOVASCULAR DISEASE, CARDIOVASCULAR SYSTEM DEVELOPMENT AND FUNCTION, ORGANISMAL INJURY AND ABNORMALITIES, TISSUE MORPHOLOGY	ABMORMAL MORPHOLOGY OF BLOOD VESSEL	6.839	1.45x10-7			ANKRD17,AXL,C1GALT1C1,CD151,CFH,CLU,CXADR,CXCL12,ECE1,FLNA,FXR1,HSD17B7,ITGA3,LDLR,MARK2,MMP14,NID1,NR2F2,PAM,PRRX1,PRRX2,PTGIS,PXN,RASA1,SHC1,SOX4,SPP1,TCF7L1,TFAP2A,TGFB2,TIMP3,TNFRSF11B	32
CANCER, ORGANISMAL INJURY AND ABNORMALITIES, REPRODUCTIVE SYSTEM DISEASE	BREAST CARCIMOMA	6.836	1.46x10-7		-1.091	ACOT9,ACSS2,AJUBA,AKR1C3,AMFR,AXL,CCNB1,CCND1,CD44,CDC42EP1,CDKN1A,CIC,CLU,CNN2,COX4I1,CSDE1,CUX1,CXCL12,CYR61,DIXDC1,DYRK1A,DYSF,EIF3E,EPDR1,EPRS,FASN,FDFT1,FDPS,FHL2,FKBP1A,FKBP8,FSCN1,GABARAPL2,GAS6,GSN,H2AFZ,HELB,HMGXB4,INPPL1,IRS2,ITGB1,JAK2,KRT7,MAPRE3,MARK2,MMP14,MYCBP2,NBN,NF2,NOTCH2,NRP2,OLFML2B,PBRM1,PDK4,PIK3R3,PLPBP,PRKX,PRRX1,PSCA,PXDN,RAB11FIP5,RALBP1,RBBP6,RTN4,S100A4,SDC1,SERPINF1…	92
CANCER, NEUROLOGICAL DISEASE, ORGANISMAL INJURY AND ABNORMALITIES	GLIOMA CAMCER	6.821	1.51x10-7			ACOT9,ACTN1,AJUBA,AKAP12,ATP1B1,ATP2A2,CCND1,CCND2,CD44,CDKN1A,CLU,COL4A1,COL4A2,CSRP2,DDR2,ELK1,FAM111A,FLNA,HIPK2,ID3,IFNAR1,IGFBP5,INPP5A,KLF3,KLF6,MAG,MMP14,MXI1,MYCBP2,MYRF,PBRM1,PCLAF,S100A4,SF3B1,SLC12A2,SMC1A,SOX9,SPP1,STAT3,TGFB2,TGFBI,TNN,TSHZ3,TUBA8,VCAM1	45
CELLULAR MOVEMENT, HEMATOLOGICAL SYSTEM DEVELOPMENT AND FUNCTION, IMMUNE CELL TRAFFICKING	CELL MOVEMEMT OF LEUKOCYTES	6.821	1.51x10-7		-0.974	ABCC1,ADAM10,ANO6,BSG,CBLB,CCND1,CD14,CD151,CD28,CD44,CD47,CD81,Cdc42,CDKN1A,CFH,CHST2,CNN2,COL4A1,CUX1,CXADR,CXCL12,CXCL2,CYR61,DDR2,DUSP1,FHL2,FLNA,GALNT1,GAS6,GBF1,GRK6,GSN,IFNAR1,IL33,IL6ST,INHBA,ITGA3,ITGA6,ITGB1,JAK2,KARS,LDLR,LGALS3,MAPK3,MMP14,MYRF,NARS,NRP2,PRKCA,RTN4,S100A4,SDC1,SELENOK,SERPINA3,SERPINB1,SERPINE1,SERPINF1,SGK1,SHC1,SOCS3,SOD3,SPP1,STAT1,STAT3,STAT6,TGFB2,TIMP3,TNFRSF11B…	74
CELLULAR DEVELOPMENT, CELLULAR GROWTH AND PROLIFERATION, NERVOUS SYSTEM DEVELOPMENT AND FUNCTION, TISSUE DEVELOPMENT	GROWTH OF MEURITES	6.807	1.56x10-7		1.651	ADAM10,ADNP,ARHGAP5,CD47,Cdc42,CDKN1A,CHST2,CXCL12,DIXDC1,DPYSL3,DYRK1A,EEA1,EIF4EBP1,ELK1,HMGCR,IL6ST,ITGA3,ITGB1,MAG,MAPK3,MARK2,NCDN,NEFH,NF2,NSG1,PIP5K1A,PJA2,PXN,RASA1,RNF6,RTN4,S100A4,SCN1B,SERPINE1,SERPINE2,SGK1,SHC1,SLC12A2,SNX12,SOCS3,SPTBN1,STAT3,STK38L,TNN,Tpm3,TTLL7,ULK1,VCAM1,Wasl,WISP2	50
CELLULAR FUNCTION AND MAINTENANCE	EMDOCYTOSIS	6.807	1.56x10-7	Increased	2.07	ABCA7,ANK1,AP1S1,ATP6V0C,AXL,CBL,CD14,CD44,CD47,CD82,Cdc42,CFH,CLCN3,CNN2,CXCL12,DAB2,EEA1,ETS2,GAK,GAPVD1,GAS6,GRK6,GSN,IFITM3,IFNAR1,IL33,INPPL1,ISG15,ITGB1,LDLR,LGALS3,MAPK3,PAN3,PIP5K1A,PRKCA,PRKX,PXN,RAB31,RAB5C,RALA,RALBP1,RORA,SCAMP1,SERPINE1,SNX12,SORT1,STEAP2,SYNE1,UCP2,XDH	50
CELL MORPHOLOGY, CELLULAR ASSEMBLY AND ORGANIZATION, CELLULAR FUNCTION AND MAINTENANCE	EXTEMSIOM OF CELLULAR PROTRUSIOMS	6.799	1.59x10-7		1.011	ACTR3,ADNP,AHI1,ARHGAP5,AXL,CD44,CD82,CDKN1A,CXCL12,DBN1,ELK1,GAS6,GOLGA4,GSN,IFRD1,INHBA,ITGB1,MAG,NRP2,PIP5K1A,PJA2,RNF6,RTN4,SCN1B,SERPINE1,SLAIN2,ULK1,UNC5B	28
CELL-TO-CELL SIGNALING AND INTERACTION	BIMDIMG OF BREAST CAMCER CELL LIMES	6.78	1.66x10-7		-0.584	CBL,CCND1,CD44,CDCP1,CXCL12,GRK6,IFITM3,ITGB1,LGALS3,MMP14,PRKCA,RASA1,SERPINE1,SPP1,TGFB1I1,ZEB1	16
CANCER, CELL DEATH AND SURVIVAL, ORGANISMAL INJURY AND ABNORMALITIES, TUMOR MORPHOLOGY	MECROSIS OF TUMOR	6.77	1.70x10-7		-0.532	BCL2L11,BSG,BTG1,CD14,CD28,CD44,CD47,Cdc42,CDKN1A,CLU,CXCL12,CYR61,DHCR7,EBNA1BP2,EIF3C,EIF3E,FASN,FHL2,FOXO4,GRK6,HIPK2,HSPA1A/HSPA1B,IL33,IL6ST,INHBA,IRF7,JAG1,JAK2,MMP11,PSCA,RND3,RTN4,SERPINA3,SERPINE1,SF3B1,SGK1,SMARCA4,SMC1A,SNRPA1,SNRPD3,SOCS3,SPC25,STAT3,TFAP2A,TNFRSF11B,TTK,U2af1,VCAM1,YES1	49
SKELETAL AND MUSCULAR SYSTEM DEVELOPMENT AND FUNCTION	FUMCTIOM OF MUSCLE	6.767	1.71x10-7		0.56	AGRN,ATP2A2,CACNA2D1,CBLB,CD44,CD47,Cdc42,CDKN1A,CHRM4,CLU,CSRP2,DUSP1,DYRK1A,DYSF,EIF4EBP1,FKBP1A,IFRD1,IGFBP5,IL6ST,INHBA,ITGA3,ITGB1,LDLR,MMP14,MRVI1,MYOG,NEB,NEXN,NUCB2,PDLIM5,PRKCA,SHC1,SLC4A1,SPP1,TGFB1I1,TIMP3,TTN,XDH	38
CANCER, ORGANISMAL INJURY AND ABNORMALITIES, REPRODUCTIVE SYSTEM DISEASE	BEMIGM MEOPLASM OF FEMALE GEMITAL ORGAM	6.735	1.84x10-7			CAVIN2,CBL,CDKN1A,CFH,CLU,COL6A3,CUX1,CYP1B1,CYR61,DAB2,DDX24,DDX6,EIF4EBP1,FTH1,IFNAR1,IGFBP5,KRT7,MAPK3,MMP11,MRVI1,MTHFD2,MYRF,NR2F2,PBRM1,PCCA,PDK4,PIK3R3,PKIA,PPP4C,PSMC3IP,RORA,SLC18A3,SMC1A,SOCS3,SORT1,SOX4,SPP1,STAT1,TBL1X,TIMP3,TRA2A,TSHZ3,TUBA8,UBE2B,USP7,YES1,ZEB1,ZYX	48
CANCER, NEUROLOGICAL DISEASE, ORGANISMAL INJURY AND ABNORMALITIES	GLIOBLASTOMA	6.726	1.88x10-7			ACOT9,ACTN1,AJUBA,AKAP12,ATP1B1,ATP2A2,CCND2,CD44,CDKN1A,CLU,COL4A1,COL4A2,CSRP2,DDR2,ELK1,FAM111A,FLNA,HIPK2,ID3,IFNAR1,IGFBP5,INPP5A,KLF3,KLF6,MAG,MMP14,MXI1,MYCBP2,MYRF,PBRM1,PCLAF,S100A4,SF3B1,SLC12A2,SMC1A,SOX9,SPP1,STAT3,TGFB2,TGFBI,TNN,TSHZ3,TUBA8,VCAM1	44
CELLULAR DEVELOPMENT, CELLULAR GROWTH AND PROLIFERATION, NERVOUS SYSTEM DEVELOPMENT AND FUNCTION, TISSUE DEVELOPMENT	OUTGROWTH OF MEURITES	6.726	1.88x10-7		1.237	ADAM10,ADNP,ARHGAP5,CD47,Cdc42,CDKN1A,CXCL12,DPYSL3,DYRK1A,EEA1,ELK1,HMGCR,IL6ST,ITGA3,ITGB1,MAG,MAPK3,MARK2,NCDN,NEFH,NF2,PIP5K1A,PJA2,PXN,RASA1,RNF6,RTN4,S100A4,SCN1B,SERPINE1,SERPINE2,SHC1,SLC12A2,SNX12,SPTBN1,STAT3,STK38L,TNN,Tpm3,TTLL7,ULK1,VCAM1,Wasl,WISP2	44
SKELETAL AND MUSCULAR SYSTEM DEVELOPMENT AND FUNCTION, TISSUE DEVELOPMENT	GROWTH OF SMOOTH MUSCLE	6.714	1.93x10-7		0.967	APOD,CBL,CCND1,CDKN1A,CLU,CXCL12,CYP1B1,ELK1,Flt1,HMGCR,ID2,ID3,IGFBP5,INHBA,ITGB1,MAPK3,MMP14,NDRG4,NOTCH2,PRKCA,PRRX1,RALBP1,RTN4,SERPINE1,SHC1,SOCS3,SOX9,SPP1,STAT1,TRAF6,WISP1,WISP2,XDH,Yap1	34
ORGANISMAL INJURY AND ABNORMALITIES, REPRODUCTIVE SYSTEM DISEASE	BEMIGM UTERIME DISEASE	6.697	2.01x10-7			CAVIN2,CBL,CFH,COL6A3,CUX1,CYP1B1,CYR61,DDX24,DDX6,EIF4EBP1,ERRFI1,FTH1,IFNAR1,IGFBP5,MAPK3,MMP11,MRVI1,MTHFD2,NR2F2,PCCA,PDK4,PIK3R3,PKIA,PPP4C,PSMC3IP,RORA,SLC18A3,SOCS3,SOX4,TBL1X,UBE2B,ZEB1,ZYX	33
CANCER, ORGANISMAL INJURY AND ABNORMALITIES, REPRODUCTIVE SYSTEM DISEASE, SKELETAL AND MUSCULAR DISORDERS	UTERIME LEIOMYOMA	6.684	2.07x10-7			CAVIN2,CBL,CFH,COL6A3,CUX1,CYP1B1,CYR61,DDX24,DDX6,EIF4EBP1,FTH1,IFNAR1,IGFBP5,MAPK3,MMP11,MRVI1,MTHFD2,NR2F2,PCCA,PDK4,PIK3R3,PKIA,PPP4C,PSMC3IP,RORA,SLC18A3,SOCS3,SOX4,TBL1X,UBE2B,ZEB1,ZYX	32
CANCER, ORGANISMAL INJURY AND ABNORMALITIES	GEMITOURIMARY TUMOR	6.676	2.11x10-7		1.933	AASDHPPT,ABCC1,ACAD8,ACSS2,ACTN1,ACTR1A,ACTR3,ADAM10,ADAM19,ADAR,ADNP,AGPAT5,AHRR,AJUBA,AKAP12,AKAP2,AKR1C3,ALPK1,AMFR,ANK1,ANKHD1/ANKHD1-EIF4EBP3,ANKRD17,ANKRD52,ANO6,AOX1,AP1B1,APOD,ARHGAP11A,ARHGAP44,ARHGAP5,ASNS,ATG16L1,ATP1B1,ATP5SL,AUH,AXL,BCL2L11,BLMH,BSG,C1QTNF2,C1R,C1S,C3orf70,C8orf44-SGK3/SGK3,CACNA2D1,CACNB2,CAGE1,CASC3,CAVIN2,CBL,CBLB,CBY1,CCNB1,CCND1,CCND2,CCPG1,CCSER2,CCT6A,CD14,CD4…	405
CANCER, CELL DEATH AND SURVIVAL, ORGANISMAL INJURY AND ABNORMALITIES, TUMOR MORPHOLOGY	CELL DEATH OF TUMOR CELLS	6.672	2.13x10-7		-0.532	BCL2L11,BSG,CD14,CD28,CD44,CD47,Cdc42,CDKN1A,CLU,CXCL12,CYR61,DHCR7,EBNA1BP2,EIF3C,EIF3E,FASN,FHL2,FOXO4,GRK6,HIPK2,HSPA1A/HSPA1B,IL33,IL6ST,INHBA,IRF7,JAG1,JAK2,MMP11,PSCA,RND3,RTN4,SERPINA3,SERPINE1,SF3B1,SGK1,SMARCA4,SMC1A,SNRPA1,SNRPD3,SOCS3,SPC25,STAT3,TFAP2A,TNFRSF11B,TTK,U2af1,VCAM1,YES1	48
CANCER, ORGANISMAL INJURY AND ABNORMALITIES	IMVASIOM OF TISSUE	6.672	2.13x10-7		-0.457	AXL,BSG,CCND1,CD151,CD44,CXCL12,FASN,IGFBP5,IL33,INHBA,JAK2,MMP11,MMP14,PDCD4,PXN,RORA,SERPINE1,SOCS3,SPP1,STAT3,TFAP2A,TGFB1I1,TIMP3,WISP2,XDH,ZEB1	26
CELL-TO-CELL SIGNALING AND INTERACTION	IMTERACTIOM OF FIBROBLAST CELL LIMES	6.656	2.17x10-7		1.553	ADNP,AKAP12,CBL,CD28,CD44,Cdc42,CXCL2,CYR61,FHL2,ITGA11,ITGA6,ITGB1,JAG1,LDLR,NF2,RASA1,SCARA3,SPP1	18
CELL DEATH AND SURVIVAL, ORGANISMAL INJURY AND ABNORMALITIES	MECROSIS OF EPITHELIAL TISSUE	6.656	2.21x10-7		0.18	ABCC1,ADAR,AXL,BCL2L11,CCND1,CD151,CD44,CDKN1A,CLU,COL4A2,CTNNA1,CXCL12,CYP7A1,DAB2,ELK1,FASN,FKBP8,FOXO4,FSTL1,GAS6,GSN,HIPK2,ID2,IGFBP5,IL33,INHBA,ITGA3,ITGA6,ITGB1,JAK2,LDLR,MAPK3,MVK,NF2,PRKCA,PTGIS,RND3,SCD,SERPINA3,SERPINE1,SERPINF1,SGK1,SHC1,SLC25A38,SOCS3,SPP1,SPTBN1,STAT1,STAT3,STAT6,TGFB1I1,TIMP3,TNFRSF11B,UCP2,UNC5B,UXT,XDH,YES1,ZEB1	59
LIPID METABOLISM, SMALL MOLECULE BIOCHEMISTRY	METABOLISM OF MEMBRAME LIPID DERIVATIVE	6.631	2.34x10-7		-1.26	ABCC1,ASAH1,CD82,COL4A3BP,CUX1,CYP39A1,CYP51A1,CYP7A1,DHCR7,DPM1,ETNK1,FADS1,FASN,FDFT1,FDPS,FDX1,FOXO4,GAPVD1,HMGCR,HSD17B7,IDI1,INPPL1,INSIG1,INSIG2,ITGB1,KDSR,LDLR,LSS,MBTPS1,MVK,NSDHL,PGS1,PIP5K1A,PLA1A,PLA2G2A,PMVK,PTPMT1,RALA,SCD,SOCS3,SQLE,XDH	42
ORGANISMAL INJURY AND ABNORMALITIES, RENAL AND UROLOGICAL DISEASE, RENAL AND UROLOGICAL SYSTEM DEVELOPMENT AND FUNCTION	ABMORMAL MORPHOLOGY OF URIMARY SYSTEM	6.623	2.38x10-7			ABCA7,BCL2L11,CACNA2D1,CD151,CDKN1A,CFH,CLU,CMIP,DHCR7,FSTL1,GAS6,GRK6,ID2,ITGA3,ITGA6,ITGB1,LAMC2,MARK2,MMP14,MTSS1,MXI1,NFAT5,PCCA,PTGIS,SERPINE1,SPP1,SPTBN1,STAT6,TGFB2,TIMP3,XDH,YES1	32
CARDIOVASCULAR SYSTEM DEVELOPMENT AND FUNCTION	MORPHOLOGY OF VESSEL	6.585	2.60x10-7			ANKRD17,AXL,C1GALT1C1,CD151,CFH,CLU,CXADR,CXCL12,CYP51A1,ECE1,FLNA,FXR1,HSD17B7,IL6ST,ITGA3,JAG1,LDLR,MARK2,MMP14,NID1,NOTCH2,NR2F2,PAM,PRRX1,PRRX2,PTGIS,PXN,RASA1,SERPINE1,SHC1,SOX4,SPP1,TCF7L1,TFAP2A,TGFB2,TIMP3,TNFRSF11B,VCAM1	38
CANCER, ORGANISMAL INJURY AND ABNORMALITIES	METASTATIC SOLID TUMOR	6.58	2.63x10-7		-0.161	ADAR,AKAP12,AKR1C3,AXL,C1R,CCND1,CCND2,CD151,CD44,CLCN3,CLU,COL4A1,COL4A2,COL6A3,CXCL12,CYP51A1,CYR61,DDR2,DPYSL3,FASN,FDFT1,FDPS,FKBP1A,FLNA,GRK6,GSTM3,HELB,HMMR,ID2,IFNAR1,IGFBP5,IL33,IRF7,ITGB1,JAG1,JAK2,KLF6,KRT7,LGALS3,MMP14,NBN,NF2,NR2F2,PRRX1,PRRX2,PTPN4,RAB31,S100A4,SCD,SDC1,SERPINE1,SERTAD2,SPP1,STAT1,STAT3,TGFB2,TNFRSF11B,TUBA8,VCAM1,YES1	60
CELLULAR MOVEMENT	IMVASIOM OF BREAST CAMCER CELL LIMES	6.544	2.86x10-7		0.098	BSG,CBL,CCND1,CD44,CD82,CDCP1,CDKN1A,CXCL12,CYR61,EIF3E,EPHB4,FSCN1,ID2,IFITM3,IRS2,ITGA3,KLF6,MMP14,NF2,NFAT5,PDCD4,PLAC1,PPIC,PRKCA,RASA1,RBFOX2,RORA,SDCBP,SOX4,SPP1,STAT3,TFAP2A,TGFB2,ZEB1	34
CELL DEATH AND SURVIVAL	CELL VIABILITY	6.542	2.87x10-7		1.81	ABCC1,ADAR,ADNP,AGRN,APOD,ASAH1,ASNS,ATF5,ATG3,ATP7A,AXL,BCL2L11,BNIP2,C8orf44-SGK3/SGK3,CBL,CCNB1,CCND1,CD151,CD28,CD44,CD47,CD81,CD82,CDKN1A,CLU,CUX1,CXCL12,CXCL2,CYR61,DAB2,DUSP1,DUSP19,DYRK1A,EBNA1BP2,EIF3C,EIF3E,EIF4G1,ELK1,EPHB4,ETS2,FASN,FLNA,FTH1,GAK,GAS6,GRK6,Hdac1l,HELB,HIPK2,HNRNPUL1,HSPA1A/HSPA1B,ID2,IGFBP5,IL33,IL6ST,INPP5A,INSIG1,IRS2,ITGA3,ITGA6,ITGB1,JAG1,JAK2,KLF6,LGALS3,MAPK3,MX…	112
EMBRYONIC DEVELOPMENT, ORGAN DEVELOPMENT, ORGANISMAL DEVELOPMENT, RESPIRATORY SYSTEM DEVELOPMENT AND FUNCTION, TISSUE DEVELOPMENT	FORMATIOM OF LUMG	6.541	2.88x10-7		0.616	AKAP12,ASAH1,ATP7A,CBY1,CCND1,CD81,CDKN1A,CIC,CXCL12,DHCR7,DUSP1,ERRFI1,FSTL1,GAK,HAT1,HSPB11,IGFBP5,ITGA3,ITGA6,ITGB1,MAPK3,MMP14,MYOG,NFIB,RC3H2,SERPINE1,SOX4,SOX9,SPRY4,STAT6,SYNE1,TGFB2,TIMP3,TNS3,TSHZ3	35
CANCER, ORGANISMAL INJURY AND ABNORMALITIES	CAMCER OF HEAD	6.507	3.11x10-7		-1.4	ADAM10,AKAP12,BSG,CCND1,CD44,CDKN1A,COL4A1,CTDNEP1,CXCL12,CXCL2,CYP51A1,DAAM1,DUSP1,FASN,GAS6,GPC6,IGFBP5,INHBA,IRS2,ITGA11,ITGA6,KDM5A,KRT7,LAMC2,MMP11,MTSS1,NBN,Nes,NOTCH2,PDLIM5,PKIA,PLA2G2A,RIN2,RND3,SERPINE1,SF3B1,SMAD6,SMARCA4,SOD3,SPP1,TIMP3,TRAM1,TTN,TUBA8,ZNF346	45
CANCER, ORGANISMAL INJURY AND ABNORMALITIES	ABDOMIMAL ADEMOCARCIMOMA	6.5	3.16x10-7			AASDHPPT,ABCA7,ABCC1,ABHD4,ACAD8,ACBD3,ACOT9,ACSS2,ACTN1,ACTR3,ADAM10,ADAM19,ADAR,ADNP,AGAP3,AGPAT5,AGRN,AHI1,AHRR,AJUBA,AKAP12,AKAP2,ALDH1L2,ALPK1,AMFR,ANK1,ANKHD1/ANKHD1-EIF4EBP3,ANKRD52,AP1B1,AP1S1,APOD,ARHGAP11A,ARHGAP44,ARHGAP5,ART3,ASAH1,ATG16L1,ATG3,ATP7A,AUH,AXL,BCL2L11,BSG,C11orf54,C14orf1,C1orf123,C1QTNF2,C1R,C1S,C2CD2,C6orf89,C8orf44-SGK3/SGK3,CACNA2D1,CACNB2,CACUL1,CAGE1,CASC3,CBL,CBL…	451
EMBRYONIC DEVELOPMENT, ORGANISMAL DEVELOPMENT	DEVELOPMEMT OF HEAD	6.47	3.39x10-7		-1.959	ADAM10,ADAM19,AHI1,ARNT2,AXL,BCL2L11,CCND1,CCND2,CDKN1A,CFH,CFL1,CLCN3,COL4A1,CXADR,CXCL12,CYP1B1,DHCR7,DIXDC1,EBF3,ECE1,FKBP8,FNDC3B,FOXQ1,FYCO1,GAK,HIPK2,HPRT1,HSD17B7,ID2,ID3,IL6ST,INHBA,INSIG1,INSIG2,IRS2,ITGA3,ITGA6,ITGB1,JAG1,LDLR,LGALS3,MAPK3,MMP14,NBN,NEFH,NF2,NFIB,NFIC,NID1,NOTCH2,NR2F2,NRP2,PHGDH,PLXNA2,PLXNB2,PRRX1,PRRX2,RAD23B,RALBP1,RBFOX2,RERE,RORA,S100A4,SERPINE1,SERPINF1,SLC1A3,SM…	89
CELLULAR MOVEMENT	HOMIMG OF CELLS	6.446	3.58x10-7		0.872	ABCC1,ACTN1,ADAM10,AKAP12,ANO6,AXL,CBL,CCND1,CD151,CD28,CD44,CD47,Cdc42,CDKN1A,CHST2,CLCN3,CLU,COL4A3BP,CXADR,CXCL12,CXCL2,CYR61,GAS6,GBF1,GRK6,GSN,IL33,INHBA,ITGA6,ITGB1,JAK2,KARS,LDLR,LGALS3,MAPK3,MMP14,NRP2,PIP5K1A,PRKCA,PXN,RALA,RALBP1,RTN4,S100A4,SCN1B,SELENOK,SERPINA3,SERPINB1,SERPINE1,SERPINF1,SHC1,SOCS3,SPP1,STAT3,STAT6,TGFB2,VCAM1,Wasl	58
CELLULAR ASSEMBLY AND ORGANIZATION, TISSUE DEVELOPMENT	FIBROGEMESIS	6.421	3.79x10-7		0.521	ACTR3,CCND1,CD14,CD44,CDKN1A,CFL1,CLASP1,COL6A3,CXCL12,DAB2,DBN1,DPYSL3,DYSF,GNG12,GSN,INPP5A,INPPL1,ITGA3,ITGB1,JAG1,KANK2,MARK2,MTSS1,NEB,NEFH,NF2,PDCD4,PXN,RASA1,RND3,SERPINA3,SERPINF1,SGK1,SLAIN2,SMARCA4,STAT3,TFAP2A,TGFBI,TNN,TNS3,Tpm3,TPR,TTN,VCAM1,ZYX	45
CANCER, ORGANISMAL INJURY AND ABNORMALITIES, REPRODUCTIVE SYSTEM DISEASE	TUMORIGEMESIS OF GEMITAL ORGAM	6.419	3.81x10-7		1.4	AASDHPPT,ABCC1,ACAD8,ACSS2,ACTN1,ACTR1A,ACTR3,ADAM10,ADAM19,ADAR,ADNP,AGPAT5,AHRR,AKAP12,AKAP2,AKR1C3,ALPK1,AMFR,ANK1,ANKHD1/ANKHD1-EIF4EBP3,ANKRD17,ANKRD52,ANO6,AOX1,AP1B1,APOD,ARHGAP11A,ARHGAP44,ARHGAP5,ASNS,ATG16L1,ATP5SL,AUH,AXL,BCL2L11,BLMH,BSG,C1QTNF2,C1R,C1S,C3orf70,C8orf44-SGK3/SGK3,CACNA2D1,CACNB2,CAGE1,CASC3,CAVIN2,CBL,CBLB,CBY1,CCNB1,CCND1,CCND2,CCPG1,CCSER2,CCT6A,CD14,CD44,CD47,CD82,C…	378
CELLULAR DEVELOPMENT, SKELETAL AND MUSCULAR SYSTEM DEVELOPMENT AND FUNCTION, TISSUE DEVELOPMENT	DIFFEREMTIATIOM OF MUSCLE CELLS	6.411	3.88x10-7		-1.232	ANKRD17,BNIP2,BTG1,CBY1,CCND1,CD81,CDKN1A,DBN1,DUSP1,EPHB4,FOXO4,ID3,IFRD1,IGFBP5,ITGA11,ITGA6,ITGB1,LDLR,MED6,MMP14,MYOG,NFIC,Rcan1,RORA,SDC1,SHC1,SMAD6,SMARCA2,SMARCA4,SOCS3,SORT1,SOX9,STAT1,SYNE1,TTN,ZEB1	36
CANCER, ORGANISMAL INJURY AND ABNORMALITIES, REPRODUCTIVE SYSTEM DISEASE	GEMITAL TUMOR	6.401	3.97x10-7		1.4	AASDHPPT,ABCC1,ACAD8,ACSS2,ACTN1,ACTR1A,ACTR3,ADAM10,ADAM19,ADAR,ADNP,AGPAT5,AHRR,AKAP12,AKAP2,AKR1C3,ALPK1,AMFR,ANK1,ANKHD1/ANKHD1-EIF4EBP3,ANKRD17,ANKRD52,ANO6,AOX1,AP1B1,APOD,ARHGAP11A,ARHGAP44,ARHGAP5,ASNS,ATG16L1,ATP5SL,AUH,AXL,BCL2L11,BLMH,BSG,C1QTNF2,C1R,C1S,C3orf70,C8orf44-SGK3/SGK3,CACNA2D1,CACNB2,CAGE1,CASC3,CAVIN2,CBL,CBLB,CBY1,CCNB1,CCND1,CCND2,CCPG1,CCSER2,CCT6A,CD14,CD44,CD47,CD82,C…	378
CANCER, GASTROINTESTINAL DISEASE, ORGANISMAL INJURY AND ABNORMALITIES	ORAL TUMOR	6.387	4.10x10-7			ABCC1,ADAM10,ANKRD17,AP1B1,ARHGAP5,ATP2A2,ATP7A,BSG,C2CD2,CASC3,CCND1,CCNL2,CD44,CDC42EP1,CLCN3,COL4A1,COL4A2,CSTF3,CXCL12,CXCL2,DAAM1,DDR2,DDX24,DDX6,DUSP1,DYRK1A,DYSF,EBF3,ETFB,FASN,FAXDC2,FDFT1,GAS6,GPC6,GTF3C1,HMMR,IGFBP5,INHBA,ITGA11,ITGA6,JAG1,KANK2,KDM5B,KIAA0040,KRT7,LAMC2,LRRK1,LUC7L3,MARK2,MFHAS1,MMP11,MTSS1,MYCBP2,NEB,NEFH,NF2,NFAT5,NOTCH2,NRM,NUFIP2,OAZ2,OGDH,PAPOLA,PBRM1,PCCA,PDLIM5,…	98
CELL-TO-CELL SIGNALING AND INTERACTION, CELLULAR ASSEMBLY AND ORGANIZATION, CELLULAR FUNCTION AND MAINTENANCE	FORMATIOM OF FOCAL ADHESIOMS	6.365	4.32x10-7	Increased	2.575	ACTN1,AJUBA,AKAP12,APOD,CCND1,CD44,CD81,Cdc42,CFL1,CLASP1,GNG12,ITGB1,JAG1,LGALS3,MMP14,PIP5K1A,PRKCA,PXN,RND3,SPP1,TNS3,Tpm3	22
NEUROLOGICAL DISEASE, ORGANISMAL INJURY AND ABNORMALITIES, PSYCHOLOGICAL DISORDERS	DEMEMTIA	6.359	4.38x10-7			ABCA7,ADAM10,ADGRL1,AGRN,AKAP2,APOD,ARNT2,ATP1B1,BCL2L11,C1R,CA5B,CACNA2D1,CACNB2,CCNB1,CD14,CHMP2B,CHRM4,CHRNB1,CLU,CXADR,CXCL12,CYP39A1,DHCR7,DYRK1A,DYSF,EIF2S1,EIF4EBP1,EPRS,ETS2,FDFT1,FDPS,GAK,GAPVD1,GGA3,HMGCR,HSPA1A/HSPA1B,INPP5A,KLF3,LDLR,LSS,MAG,MVK,NEFH,PLA2G2A,PRKCA,SC5D,SCD,SCN1B,SDC1,SERPINA3,SERPINE1,SERPINE2,SLC1A3,SLC25A38,SORT1,SRPK2,STAT3,STRN3,STXBP5,TIMP3,TSHZ3,TUBA8	62
CANCER, ORGANISMAL INJURY AND ABNORMALITIES	ABDOMIMAL CARCIMOMA	6.347	4.50x10-7			AASDHPPT,ABCA7,ABCC1,ABHD4,ACAD8,ACBD3,ACOT9,ACSS2,ACTN1,ACTR3,ADAM10,ADAM19,ADAR,ADNP,AGAP3,AGPAT5,AGRN,AHI1,AHRR,AJUBA,AKAP12,AKAP2,ALDH1L2,ALPK1,AMFR,ANK1,ANKHD1/ANKHD1-EIF4EBP3,ANKRD52,AP1B1,AP1S1,APOD,ARHGAP11A,ARHGAP44,ARHGAP5,ART3,ASAH1,ATG16L1,ATG3,ATP7A,AUH,AXL,BCL2L11,BSG,C11orf54,C14orf1,C1orf123,C1QTNF2,C1R,C1S,C2CD2,C3orf70,C6orf89,C8orf44-SGK3/SGK3,CACNA2D1,CACNB2,CACUL1,CAGE1,CASC3…	455
POST-TRANSLATIONAL MODIFICATION	PHOSPHORYLATIOM OF PROTEIM	6.334	4.63x10-7		1.189	ADAM10,AGRN,BSG,C8orf44-SGK3/SGK3,CBL,CBLB,CCNB1,CCND1,CCND2,CD28,CD44,CD47,CD81,Cdc42,CDKN1A,CFL1,COL4A3BP,CSNK1G3,CSNK2A2,CYR61,DAB2,Dclk1,DDR2,DUSP1,DYRK1A,EIF2S1,EPHB4,FKBP1A,FKBP8,FLNA,Flt1,GAS6,GRK6,HIPK2,HSPA4,INHBA,ITGA6,ITGB1,JAK2,MAPK3,MARK2,NF2,PDK4,PLXNB2,PRKAR1B,PRKCA,PRKX,RASA1,SDCBP,SGK1,SLC3A2,SOCS3,SOX9,SPP1,SRPK2,SRPX2,STAT3,STK38L,TGFB2,TTK,ULK1,XDH,YES1,ZC3H12A	64
CARDIOVASCULAR DISEASE, CARDIOVASCULAR SYSTEM DEVELOPMENT AND FUNCTION, ORGAN MORPHOLOGY, ORGANISMAL DEVELOPMENT, ORGANISMAL INJURY AND ABNORMALITIES	ABMORMAL MORPHOLOGY OF HEART	6.326	4.72x10-7			ADAM10,ADAM19,AKAP12,ANKRD17,ATP2A2,CCND1,CCND2,CLU,CSRP2,CXADR,CYP51A1,ECE1,FKBP1A,FLNA,FXR1,GJA5,Hist1h1e,HSD17B7,IL6ST,ITPA,JAG1,MMP14,NEXN,NFAT5,NR2F2,PDLIM5,PRKCA,RASA1,SHC1,SLC4A1,SMTN,SOX4,SPTBN1,TCF7L1,TFAP2A,TGFB2,TIMP3,TRAF6,TTN,VCAM1,Wasl	41
RESPIRATORY SYSTEM DEVELOPMENT AND FUNCTION	RESPIRATORY SYSTEM DEVELOPMEMT	6.31	4.90x10-7		0.616	AKAP12,ASAH1,ATP7A,CBY1,CCND1,CD81,CDKN1A,CIC,CXCL12,DHCR7,DUSP1,EBF3,ECE1,ERRFI1,FSTL1,GAK,HAT1,HSPB11,IGFBP5,ITGA3,ITGA6,ITGB1,MAPK3,MMP14,MYOG,NFIB,RC3H2,SERPINE1,SMCHD1,SOX4,SOX9,SPRY4,STAT6,SYNE1,TGFB2,TIMP3,TNS3,TSHZ3	38
CELLULAR ASSEMBLY AND ORGANIZATION	FORMATIOM OF CYTOSKELETOM	6.308	4.92x10-7		1.314	ACTR3,AKAP2,CCND1,CD44,CDKN1A,CFL1,CLASP1,CXCL12,DAB2,DBN1,DPYSL3,FLNA,GNG12,GSN,INPP5A,INPPL1,ITGA3,ITGB1,JAG1,KANK2,MARK2,MTSS1,NEFH,NF2,PAM,PXN,RASA1,RND3,SERPINF1,SGK1,SLAIN2,SLC4A2,SMARCA4,STAT3,TFAP2A,TGFBI,TNN,TNS3,Tpm3,TRAF6,VCAM1,ZYX	42
INFECTIOUS DISEASES	REPLICATIOM OF RMA VIRUS	6.302	4.99x10-7		0.062	ADAM10,ADAR,AGO1,AP1M1,ATP1B3,ATP6V0C,BNIP2,CD28,CD81,CXCL12,DAG1,DDX6,DYRK1A,EIF2S1,EIF3C,EIF4EBP1,EIF4EBP2,FASN,FDPS,FSCN1,GAK,GRK6,HMGCR,IFITM3,IFNAR1,IRF7,ISG15,ITGA3,JAK2,MARK2,MED6,MID1IP1,NEK9,PPP4C,PRKCA,PTPMT1,RAB33B,RAE1,SAFB,SF3B1,SGK1,SOCS3,SPP1,SRPK2,STAT1,STAT3,TGFB2,TRAF6,TRIM25,ZC3H12A	50
ORGANISMAL SURVIVAL	PERIMATAL DEATH	6.292	5.10x10-7		-0.634	AGRN,ARHGAP5,ARNT2,ATG16L1,ATG3,ATP2A2,BLMH,CCND1,CD44,CDKN1A,CREB5,CXCL12,CYP7A1,DHCR7,ECE1,FKBP1A,FKBP8,FNDC3B,FSTL1,FXR1,GAK,GJA5,HAT1,ID2,IL6ST,INHBA,ITGA3,ITGA6,ITPA,KDM5A,MMP14,MYCBP2,MYLPF,MYOG,NBN,NFAT5,NFIB,PRRX1,PRRX2,RAB3D,RAD23B,SAFB,SC5D,Scd2,SLC4A2,SMARCC2,SOX4,SOX9,SPRY4,STAT3,SYNE1,TFAP2A,TGFB2,TRAF6,ULK1,YES1,ZEB1	57
LIPID METABOLISM, SMALL MOLECULE BIOCHEMISTRY	SYMTHESIS OF LIPID	6.284	5.20x10-7		-0.306	ABCC1,ACBD3,ACSS2,AKR1C3,ASAH1,CD14,CD82,CLU,COTL1,CTDNEP1,CUX1,CXCL12,CYP1B1,CYP39A1,CYP51A1,CYP7A1,DAB2,DHCR7,DPM1,ELOVL6,ETNK1,FADS1,FASN,FDFT1,FDPS,FDX1,FOXO4,GAPVD1,HMGCR,HSD17B7,IDI1,IL33,INHBA,INPPL1,INSIG1,INSIG2,ITGA3,ITGA6,ITGB1,JAK2,KDSR,LDLR,LSS,MAPK3,MBTPS1,MID1IP1,MLYCD,MVD,MVK,NR2F2,PDK4,PGD,PGS1,PIP5K1A,PLA2G2A,PMVK,PRKCA,PTGIS,PTPMT1,RALA,SCD,Scd2,SERPINE2,SLC1A3,SOCS3,STAT3	66
CELLULAR DEVELOPMENT, CELLULAR GROWTH AND PROLIFERATION, ORGAN DEVELOPMENT, SKELETAL AND MUSCULAR SYSTEM DEVELOPMENT AND FUNCTION, TISSUE DEVELOPMENT	PROLIFERATIOM OF SMOOTH MUSCLE CELLS	6.267	5.41x10-7		1.139	APOD,CBL,CCND1,CDKN1A,CLU,CXCL12,CYP1B1,ELK1,Flt1,HMGCR,ID2,ID3,IGFBP5,INHBA,ITGB1,MAPK3,MMP14,NDRG4,NOTCH2,PRKCA,PRRX1,RALBP1,RTN4,SERPINE1,SHC1,SOCS3,SPP1,STAT1,TRAF6,WISP1,WISP2,XDH,Yap1	33
CELLULAR DEVELOPMENT, CELLULAR GROWTH AND PROLIFERATION, ORGAN DEVELOPMENT, SKELETAL AND MUSCULAR SYSTEM DEVELOPMENT AND FUNCTION, TISSUE DEVELOPMENT	PROLIFERATIOM OF MUSCLE CELLS	6.258	5.52x10-7		1.034	AKIP1,APOD,CBL,CCND1,CDKN1A,CLU,CXADR,CXCL12,CYP1B1,DUSP1,ELK1,Flt1,H2AFZ,HMGCR,ID2,ID3,IGFBP5,INHBA,ITGA6,ITGB1,MAPK3,MMP14,MYOG,NDRG4,NFAT5,NOTCH2,PRKCA,PRRX1,RALBP1,RTN4,SERPINE1,SHC1,SMARCA4,SOCS3,SPP1,STAT1,TRAF6,WISP1,WISP2,XDH,Yap1	41
CELL MORPHOLOGY	ABMORMAL MORPHOLOGY OF CELLS	6.245	5.69x10-7			ADAR,AGRN,AHI1,ANO6,ATP2A2,BAZ1A,BCL2L11,C8orf44-SGK3/SGK3,CBL,CBLB,CBY1,CCND1,CCND2,CD151,CD28,CD44,CD47,CD81,Cdc42,CDKN1A,CFH,CIRBP,CLCN3,CLDN15,CLU,CMIP,CNN2,CSNK2A2,CSRP2,CTDNEP1,CXADR,DBN1,DUSP1,DYRK1A,DYSF,ECE1,EIF4EBP2,FSTL1,FXR1,HSPA4,ID2,ID3,IFNAR1,IGFBP5,IL6ST,INSIG1,IRS2,ITGA3,ITGA6,ITGB1,ITPA,JAK2,KDM5A,KNSTRN,LDLR,LGALS3,MAG,MAPK8IP2,MARK2,MMP14,MXI1,MYCBP2,MYOG,NBN,NEB,NEFH,Nes,NFIB…	109
METABOLIC DISEASE, NEUROLOGICAL DISEASE, ORGANISMAL INJURY AND ABNORMALITIES, PSYCHOLOGICAL DISORDERS	ALZHEIMER DISEASE	6.238	5.78x10-7			ABCA7,ADAM10,ADGRL1,AGRN,AKAP2,APOD,ARNT2,ATP1B1,BCL2L11,C1R,CACNB2,CCNB1,CD14,CHRM4,CHRNB1,CLU,CXADR,CXCL12,CYP39A1,DHCR7,DYRK1A,DYSF,EIF2S1,EIF4EBP1,EPRS,ETS2,FDFT1,FDPS,GAK,GAPVD1,GGA3,HMGCR,HSPA1A/HSPA1B,INPP5A,KLF3,LDLR,LSS,MAG,MVK,NEFH,PLA2G2A,PRKCA,SC5D,SCD,SCN1B,SDC1,SERPINA3,SERPINE2,SLC1A3,SLC25A38,SORT1,SRPK2,STAT3,STRN3,STXBP5,TIMP3,TSHZ3,TUBA8	58
CELL MORPHOLOGY, CELLULAR DEVELOPMENT	BRAMCHIMG OF CELLS	6.193	6.37x10-7		0.792	ACTR3,ADAM10,AGRN,CD44,Cdc42,CDKN1A,CFL1,CHMP2B,CXCL12,CYR61,DBN1,Dock4,DPYSL3,DYNLT1,DYRK1A,EIF4EBP1,EIF4EBP2,ELK1,EPHB4,GAS6,ITGA3,ITGB1,MAG,NEFH,NSG1,PAM,PIP5K1A,PRKX,RALA,RND3,RTN4,SGK1,SLC18A3,SPP1,SRPX2,STAT3,STK38L,TNN,TRAF6,UBQLN2,ULK1,UNC5B	42
INFECTIOUS DISEASES	IMFECTIOM BY RMA VIRUS	6.193	6.41x10-7		-0.434	ACTR3,ADAM10,AP1B1,ARGLU1,ATP6V0C,AXL,BSG,C1R,C1S,CACNA2D1,CBL,CBLB,CD14,CD28,CD44,CLU,CXCL12,CYP51A1,DAG1,DNAL1,DPM1,DYSF,EEA1,EIF4EBP1,EIF4EBP2,ETS2,FDFT1,FDPS,FKBP1A,FXR1,GABARAPL2,GAPVD1,GAS6,GATAD2A,GBF1,HMGCR,HSPA4,IFITM3,IFNAR1,ISG15,ITGB1,KARS,MAPK8IP2,MBTPS1,MED6,MID1IP1,MYRF,NEK9,NF2,NOP56,OSBPL6,PANK3,PIP5K1A,PRKCA,PRKX,RAB3D,RAB5C,RAD23A,RNF41,S100A4,SDC1,SEPT8,SF3B1,SNRPA1,SNRPD3,SPA…	80
CELL MORPHOLOGY, CELLULAR ASSEMBLY AND ORGANIZATION, CELLULAR FUNCTION AND MAINTENANCE	FORMATIOM OF CELLULAR PROTRUSIOMS	6.166	6.82x10-7		0.337	ACTR3,ADAM10,AGRN,AHI1,AJUBA,AKAP12,ARHGAP5,ATP7A,BSG,CBY1,CD44,CD47,CD81,CD82,Cdc42,CDC42EP1,CDKN1A,CFL1,CHMP2B,CLU,CSNK2A2,CXCL12,CYR61,DAG1,DBN1,DIXDC1,Dock4,DPYSL3,DYNLT1,DYRK1A,EIF4EBP1,EIF4EBP2,ELK1,FASN,FLNA,FSCN1,GSN,HPRT1,INHBA,ITGA3,ITGA6,ITGB1,MAG,MAP6,MAPK8IP2,MARK2,MTSS1,NCDN,NEFH,NF2,NFIB,NRP2,NSG1,PHGDH,PIP5K1A,PLXNB2,PRKCA,PXN,RAB31,RALA,RBFOX2,RERE,RTN4,S100A4,SERPINE1,SERPINF1,S…	82
CONNECTIVE TISSUE DISORDERS, HEREDITARY DISORDER, ORGANISMAL INJURY AND ABNORMALITIES	HEREDITARY COMMECTIVE TISSUE DISORDER	6.13	7.42x10-7			ABCC1,ASAH1,ATP7A,C1R,C1S,CBL,CD151,CLU,COL4A1,COL6A3,DDR2,ERF,FDFT1,FDPS,FKBP10,FLNA,GPC6,INPPL1,ITGA3,ITGA6,ITGB1,LAMC2,LBR,MBTPS1,NOTCH2,PLA2G2A,PYCR1,RAB33B,RIN2,SERPINF1,SMS,STRN3,TGFBI,TNFRSF11B,TUBA8,XDH	36
CANCER	CELL TRAMSFORMATIOM	6.122	7.55x10-7		-1.981	ATG3,AXL,CBL,CCND1,CCND2,Cdc42,CDKN1A,CLU,CYR61,EIF2S1,EIF4EBP1,EIF4EBP2,EIF4G1,ERRFI1,FOXO4,FTH1,GTF2I,HSPA1A/HSPA1B,ID2,ITGB1,JAG1,JAK2,KLF6,LGALS3,LPP,MXD3,MXI1,NBN,NF2,PDCD4,RASA1,SDCBP,SERPINA3,SHC1,SLC3A2,SMARCA2,SOX9,SPP1,STAT3,TGFB2,TPR,TRAF6,UBTF,USP7,WISP1,YES1	46
ORGANISMAL DEVELOPMENT, ORGANISMAL INJURY AND ABNORMALITIES	ABMORMAL MORPHOLOGY OF ABDOMEM	6.107	7.82x10-7			ABCA7,ADAM19,ADAR,AKAP12,ASAH1,AXL,BCL2L11,BSG,CACNA2D1,CBL,CCND1,CD151,CD44,CD47,CDKN1A,CFH,CLCN3,CLDN15,CLU,CMIP,CUX1,CYP7A1,DHCR7,DUSP1,ERRFI1,FDFT1,FSTL1,GAS6,GRK6,ID2,IFNAR1,IGFBP5,IL6ST,IRS2,ITGA3,ITGA6,ITGB1,JAG1,LAMC2,LDLR,LGALS3,MAPK8IP2,MARK2,MMP14,MTHFD2,MTSS1,MXI1,NBN,NFAT5,NOTCH2,NR2F2,PCCA,PRRX1,PSMC3IP,PTGIS,RAD23B,SAFB,SC5D,SERPINE1,SLC12A2,SLC4A1,SLC4A2,SMTN,SOCS3,SOCS7,SOX4,SOX9…	79
CANCER, ORGANISMAL INJURY AND ABNORMALITIES, REPRODUCTIVE SYSTEM DISEASE	PROSTATE CAMCER AMD TUMORS	6.106	7.84x10-7		1.77	ABCC1,ACAD8,ACSS2,ACTR1A,ADAM10,ADAR,AGPAT5,AHRR,AKAP12,AKAP2,AKR1C3,AMFR,ANK1,ANKHD1/ANKHD1-EIF4EBP3,ANKRD17,ANO6,AOX1,APOD,ARHGAP11A,ARHGAP44,ARHGAP5,ASNS,ATG16L1,ATP5SL,AXL,BCL2L11,C1QTNF2,C1R,C1S,C8orf44-SGK3/SGK3,CACNA2D1,CAGE1,CASC3,CBL,CBLB,CBY1,CCNB1,CCND1,CCND2,CCSER2,CD14,CD44,CD82,CDC42EP1,CDKN1A,CFH,CGGBP1,CHERP,CHMP2B,CHRM4,CHST2,CIC,CIRBP,CLASP1,CLU,CMIP,COL4A1,COL4A2,COL6A3,CPSF7,C…	242
IMMUNOLOGICAL DISEASE, ORGANISMAL INJURY AND ABNORMALITIES	LYMPHADEMOPATHY	6.048	8.96x10-7		-0.378	BCL2L11,CCND1,CD28,CD44,CXCL12,FKBP1A,HELB,HMMR,IFNAR1,IL6ST,ITGB1,JAK2,LDLR,MARK2,SERPINE1,SF3B1,SPP1,STAT3,STAT6,TUBA8	20
CANCER, HEMATOLOGICAL DISEASE, ORGANISMAL INJURY AND ABNORMALITIES	LYMPHOHEMATOPOIETIC CAMCER	6.03	9.33x10-7		-0.456	ABCA7,ABCC1,ACOT9,ADAM10,ADAM19,ADAR,AHI1,AKAP12,AKAP2,ALDH1L2,ALPK1,ANXA4,ATP1B1,AXL,BCL2L11,BTG1,C1R,C2CD2,C8orf44-SGK3/SGK3,CACNB2,CAVIN2,CBL,CBLB,CCNB1,CCND1,CCND2,CCPG1,CD14,CD151,CD28,CD44,CD47,CDCP1,CDKN1A,CFL1,CHRM4,CHRNB1,CIC,CLU,CMIP,COL4A1,COL4A2,COL4A3BP,CSDE1,CSTF3,CUX1,CXCL12,CXCL2,CYP1B1,CYP51A1,CYR61,DAAM1,DAP,DDR2,DYRK1A,EBF3,EIF3C,EIF4EBP1,EIF4G1,ELF2,ELK1,ETNK1,FASN,FDFT1,FDPS,…	189
CANCER, GASTROINTESTINAL DISEASE, ORGANISMAL INJURY AND ABNORMALITIES	UPPER GASTROIMTESTIMAL TRACT TUMOR	6.024	9.46x10-7		-1.974	ABCA7,ABCC1,ACOT9,ADAM10,ADNP,AGRN,AHRR,AKAP2,ANKRD17,AOX1,AP1B1,ARHGAP5,ATF5,ATP2A2,ATP7A,AXL,BSG,C11orf54,C2CD2,CASC3,CBLB,CCND1,CCND2,CCNL2,CCPG1,CD44,CDC42EP1,CDKN1A,CFH,CLCN3,CLU,COL4A1,COL4A2,COL6A3,COX4I1,CSTF3,CTNNA1,CUX1,CXCL12,CXCL2,CYR61,DAAM1,DAB2,DAG1,DDR2,DDX24,DDX6,DHX57,DPYSL3,DUSP1,DYRK1A,DYSF,EBF3,ERF,ERRFI1,ETFB,FAM111A,FAM53C,FASN,FAXDC2,FDFT1,FKBP10,FKBP1A,FLNA,FNBP4,FNDC3B,F…	196
CELL-TO-CELL SIGNALING AND INTERACTION, CONNECTIVE TISSUE DEVELOPMENT AND FUNCTION	BIMDIMG OF FIBROBLAST CELL LIMES	6.022	9.50x10-7		1.795	ADNP,AKAP12,CBL,CD28,CD44,CXCL2,CYR61,FHL2,ITGA11,ITGA6,ITGB1,JAG1,LDLR,NF2,RASA1,SCARA3,SPP1	17
CELLULAR MOVEMENT, CONNECTIVE TISSUE DEVELOPMENT AND FUNCTION	CELL MOVEMEMT OF FIBROBLAST CELL LIMES	6.002	9.95x10-7		0.833	ACTR3,ATG3,CD151,CD44,Cdc42,CDKN1A,CXCL12,DAB2,FHL2,FLNA,GNG12,ITGA11,ITGB1,JAG1,MMP14,MTSS1,NF2,PXN,RALBP1,RASA1,RTN4,SDC1,SERPINE1,SPP1,STAT3,TGFB1I1	26
CELL MORPHOLOGY	SPROUTIMG	5.991	1.02x10-6		0.525	ACTR3,ADAM10,AGRN,CD44,Cdc42,CDKN1A,CFL1,CHMP2B,CXCL12,CYR61,DBN1,Dock4,DPYSL3,DYNLT1,DYRK1A,EIF4EBP1,EIF4EBP2,ELK1,EPHB4,ITGA3,ITGB1,JAK2,MAG,MMP14,NEFH,NSG1,PIP5K1A,PRKX,RALA,RTN4,SGK1,SLC18A3,SPP1,SPRY4,SRPX2,STAT3,STK38L,TIMP3,TNN,TRAF6,UBQLN2,ULK1,UNC5B	43
EMBRYONIC DEVELOPMENT, ORGANISMAL DEVELOPMENT, TISSUE DEVELOPMENT	GROWTH OF EMBRYOMIC TISSUE	5.991	1.02x10-6		1.398	ARHGAP5,CCND1,CD44,CDKN1A,CLU,CTNNA1,CXCL12,DYRK1A,ID2,ID3,IGFBP5,INHBA,IRS2,ITGA6,ITGB1,JAG1,MXD3,MXI1,NBN,PLXNB2,PRRX1,PRRX2,Rcan1,S100A4,SCN1B,SLC1A3,SMARCA4,SOX9,STAT1,STAT3,TCF7L1,ZEB1	32
CANCER, ORGANISMAL INJURY AND ABNORMALITIES, REPRODUCTIVE SYSTEM DISEASE	PROSTATE CAMCER	5.959	1.10x10-6	Increased	2.392	ABCC1,ACAD8,ACSS2,ACTR1A,ADAM10,ADAR,AGPAT5,AHRR,AKAP12,AKAP2,AKR1C3,AMFR,ANK1,ANKHD1/ANKHD1-EIF4EBP3,ANKRD17,ANO6,AOX1,APOD,ARHGAP11A,ARHGAP44,ARHGAP5,ASNS,ATG16L1,ATP5SL,AXL,BCL2L11,C1QTNF2,C1R,C1S,C8orf44-SGK3/SGK3,CACNA2D1,CAGE1,CASC3,CBL,CBLB,CBY1,CCNB1,CCND1,CCND2,CCSER2,CD14,CD44,CD82,CDC42EP1,CDKN1A,CFH,CGGBP1,CHERP,CHMP2B,CHRM4,CHST2,CIC,CIRBP,CLASP1,CLU,CMIP,COL4A1,COL4A2,COL6A3,CPSF7,C…	240
CANCER, ORGANISMAL INJURY AND ABNORMALITIES, REPRODUCTIVE SYSTEM DISEASE	MALE GEMITAL MEOPLASM	5.951	1.12x10-6		1.963	ABCC1,ACAD8,ACSS2,ACTR1A,ADAM10,ADAR,AGPAT5,AHRR,AKAP12,AKAP2,AKR1C3,AMFR,ANK1,ANKHD1/ANKHD1-EIF4EBP3,ANKRD17,ANO6,AOX1,APOD,ARHGAP11A,ARHGAP44,ARHGAP5,ASNS,ATG16L1,ATP5SL,AXL,BCL2L11,BLMH,C1QTNF2,C1R,C1S,C8orf44-SGK3/SGK3,CACNA2D1,CAGE1,CASC3,CBL,CBLB,CBY1,CCNB1,CCND1,CCND2,CCSER2,CD14,CD44,CD82,CDC42EP1,CDKN1A,CFH,CGGBP1,CHERP,CHMP2B,CHRM4,CHST2,CIC,CIRBP,CLASP1,CLU,CMIP,COL4A1,COL4A2,COL6A3,CP…	244
ORGAN MORPHOLOGY, ORGANISMAL DEVELOPMENT, ORGANISMAL INJURY AND ABNORMALITIES, RENAL AND UROLOGICAL DISEASE, RENAL AND UROLOGICAL SYSTEM DEVELOPMENT AND FUNCTION	ABMORMAL MORPHOLOGY OF KIDMEY	5.924	1.19x10-6			ABCA7,BCL2L11,CD151,CDKN1A,CFH,CLU,CMIP,FSTL1,GAS6,GRK6,ID2,ITGA3,ITGB1,LAMC2,MARK2,MMP14,MTSS1,MXI1,NFAT5,PCCA,PTGIS,SERPINE1,SPP1,SPTBN1,STAT6,TGFB2,TIMP3,XDH,YES1	29
PROTEIN DEGRADATION, PROTEIN SYNTHESIS	CATABOLISM OF PROTEIM	5.917	1.21x10-6		0.747	ADAM10,ADAM19,AGAP3,AMFR,ATP1B1,ATP1B3,C1S,CBLB,CCT6A,CD81,Cdc42,CFL1,CLU,DAG1,DNAJB12,ECE1,FLNA,GGA3,GSN,HSPA1A/HSPA1B,HYPK,ITGB1,JAK2,LSS,MBTPS1,MMP11,MMP14,MYCBP2,NF2,OAZ2,PEX19,PSMF1,RAD23A,RNF41,RNF6,RTN4,SDC1,SELENOS,SERPINB1,SERPINE1,SERPINE2,SNX12,SOCS3,SOX4,SOX9,TBC1D10A,TBL1X,TCP1,TIMP3,TIPARP,TMEM88,TRIM25,UBE2B,UBE2H,UCHL3,USP7	56
CELL-TO-CELL SIGNALING AND INTERACTION, INFLAMMATORY RESPONSE	RESPOMSE OF PHAGOCYTES	5.91	1.23x10-6		1.597	ABCA7,ATP7A,AXL,CD14,CD44,CD47,CFH,CLCN3,CNN2,CXCL12,DBN1,GRK6,GSN,IFNAR1,IL33,IL6ST,ISG15,ITGB1,LGALS3,PRKCA,PXN,RORA,SERPINE1,SHC1,STAT3,TRAF6,UCP2,VCAM1	28
CELL DEATH AND SURVIVAL, SKELETAL AND MUSCULAR DISORDERS	CELL DEATH OF MUSCLE CELLS	5.907	1.24x10-6		1.691	ATG16L1,BCL2L11,BNIP2,CACNB2,CBL,CDKN1A,CXADR,CXCL12,CYR61,DAG1,DYSF,FASN,FSTL1,GSN,ID2,IL33,IL6ST,INHBA,INPPL1,JAK2,PDCD4,RTN4,SERPINF1,SHC1,SLC18A3,SOCS3,SORT1,SPP1,STAT1,STAT3,TGFB1I1,TIMP3,TTN,WISP1,XDH,Yap1,ZYX	37
CANCER, ORGANISMAL INJURY AND ABNORMALITIES, REPRODUCTIVE SYSTEM DISEASE	MALIGMAMT MEOPLASM OF MALE GEMITAL ORGAM	5.903	1.25x10-6	Increased	2.392	ABCC1,ACAD8,ACSS2,ACTR1A,ADAM10,ADAR,AGPAT5,AHRR,AKAP12,AKAP2,AKR1C3,AMFR,ANK1,ANKHD1/ANKHD1-EIF4EBP3,ANKRD17,ANO6,AOX1,APOD,ARHGAP11A,ARHGAP44,ARHGAP5,ASNS,ATG16L1,ATP5SL,AXL,BCL2L11,BLMH,C1QTNF2,C1R,C1S,C8orf44-SGK3/SGK3,CACNA2D1,CAGE1,CASC3,CBL,CBLB,CBY1,CCNB1,CCND1,CCND2,CCSER2,CD14,CD44,CD82,CDC42EP1,CDKN1A,CFH,CGGBP1,CHERP,CHMP2B,CHRM4,CHST2,CIC,CIRBP,CLASP1,CLU,CMIP,COL4A1,COL4A2,COL6A3,CP…	242
CELL-TO-CELL SIGNALING AND INTERACTION	ACTIVATIOM OF COMMECTIVE TISSUE CELLS	5.893	1.28x10-6		1.982	ARHGAP5,CBL,CCND1,CD44,CXCL12,IL6ST,JAK2,LDLR,LGALS3,MMP14,NBR1,SERPINA4,SLC4A2,SPP1,STAT1,STAT3,STAT6,TGFB2,TNFRSF11B,TRAF6,VCAM1	21
CARDIOVASCULAR DISEASE, ORGANISMAL INJURY AND ABNORMALITIES	PERIPHERAL VASCULAR DISEASE	5.883	1.31x10-6			ADAR,CA5B,CACNA2D1,CACNB2,CFH,CHMP2B,CHRM4,CHRNB1,CLU,COL4A1,CXCL12,DAB2,EBNA1BP2,ETS2,FTH1,GSN,HEBP2,HMGCR,HSPA1A/HSPA1B,HSPA4,IGFBP5,LBR,LDLR,NDRG4,NR2F2,PDLIM5,RAB33B,RFK,RTN4,SCN1B,SELENOS,SERPINA3,SERPINE1,SGK1,SLC25A38,SPP1,SUB1,TGFB2,TNFRSF11B,TTLL7,TUBA8,UBE2H,UCP2,VCAM1,XDH	45
SKELETAL AND MUSCULAR SYSTEM DEVELOPMENT AND FUNCTION	MORPHOLOGY OF MUSCLE	5.879	1.32x10-6			ADAM19,ANKRD17,ATP2A2,ATP6V0C,CD47,CDKN1A,CLU,CSRP2,CXADR,CXCL12,CYP1B1,DAG1,DUSP1,DYRK1A,DYSF,ECE1,FHL2,FKBP1A,FXR1,H2AFZ,HSD17B7,IFRD1,IGFBP5,IL33,IL6ST,INHBA,INPPL1,ITGB1,ITPA,JAK2,MMP14,MYCBP2,MYLPF,MYOG,NEB,PDLIM5,PRKCA,SERPINE1,SHC1,SOX4,SPP1,SPTBN1,STAT3,SYNE1,TGFB2,TLN2,Tpm3,TTN,UCHL3,VCAM1,Yap1	51
CANCER, HEMATOLOGICAL DISEASE, ORGANISMAL INJURY AND ABNORMALITIES	HEMATOLOGIC CAMCER	5.863	1.37x10-6		-0.237	ABCA7,ABCC1,ACOT9,ADAM10,ADAM19,ADAR,AHI1,AKAP12,AKAP2,ALDH1L2,ALPK1,ANXA4,ATP1B1,AXL,BCL2L11,BTG1,C1R,C2CD2,C8orf44-SGK3/SGK3,CACNB2,CAVIN2,CBL,CBLB,CCNB1,CCND1,CCND2,CCPG1,CD14,CD151,CD28,CD44,CD47,CDCP1,CDKN1A,CFL1,CHRM4,CHRNB1,CIC,CLU,CMIP,COL4A1,COL4A2,COL4A3BP,CSDE1,CSTF3,CUX1,CXCL12,CXCL2,CYP1B1,CYP51A1,CYR61,DAAM1,DAP,DDR2,DYRK1A,EBF3,EIF3C,EIF4EBP1,EIF4G1,ELF2,ELK1,ETNK1,FASN,FDFT1,FDPS,…	187
CANCER, ORGANISMAL INJURY AND ABNORMALITIES, SKELETAL AND MUSCULAR DISORDERS	MUSCLE TUMOR	5.863	1.37x10-6			AGRN,AHI1,CAVIN2,CBL,CD44,CDKN1A,CFH,CHERP,CLU,COL6A3,CUX1,CYP1B1,CYP7A1,CYR61,DDX24,DDX6,DUSP1,EIF4EBP1,EIF4G1,FKBP1A,FTH1,GSE1,HSPA1A/HSPA1B,IFNAR1,IGFBP5,INPP5A,ITGA11,KLF3,LAMC2,MAPK3,MBTPS1,MLYCD,MMP11,MRVI1,MTHFD2,MYCBP2,NR2F2,PCCA,PDK4,PIK3R3,PKIA,PLPPR2,PPP4C,PSMC3IP,RAD23B,RNF111,RORA,SHC1,SLC18A3,SOCS3,SOX4,SPP1,SYNE1,TBL1X,TNRC18,TTK,TTN,TUBA8,UBE2B,WISP2,ZEB1,ZYX	62
CELLULAR MOVEMENT	IMVASIOM OF COLORECTAL CAMCER CELL LIMES	5.842	1.44x10-6		0.834	AXL,CCND1,CD44,CD82,CXCL12,FSCN1,HIPK2,NFAT5,PDCD4,RASA1,S100A4,STAT3,STK38L,UNC5B,ZEB1	15
CANCER, ORGANISMAL INJURY AND ABNORMALITIES	TUMORIGEMESIS OF BEMIGM TUMOR	5.833	1.47x10-6		-0.169	AJUBA,CCNB1,CCND1,CD44,CDKN1A,CFH,CHRNB1,CLU,CNNM2,CYP1B1,DAB2,DDX6,DUT,EIF4EBP1,ERRFI1,FDFT1,FDPS,FKBP10,FOXO4,FOXQ1,IFITM3,IL6ST,INHBA,ITGA6,ITGB1,KRT7,LGALS3,MMP14,MYRF,NBN,NF2,NFIB,NRP2,PBRM1,PDK4,PLA2G2A,PRKCA,PSAT1,PTGIS,Ptprv,RND3,S100A4,SLC12A2,SLC7A5,SMC1A,SORT1,SOX9,SPP1,SPTBN1,STAT1,STAT3,STRN3,TFAP2A,TIMP3,TRA2A,TSHZ3,TUBA8,USP7,VCAM1,YES1	60
CELLULAR DEVELOPMENT, CELLULAR GROWTH AND PROLIFERATION, EMBRYONIC DEVELOPMENT, ORGANISMAL DEVELOPMENT, TISSUE DEVELOPMENT	PROLIFERATIOM OF GRAMULE MEUROM PROGEMITOR CELLS	5.807	1.56x10-6		-0.659	CXCL12,IGFBP5,MXD3,MXI1,NBN,PLXNB2,SCN1B,SMARCA4	8
CELLULAR MOVEMENT	CHEMOTAXIS	5.799	1.59x10-6		0.696	ABCC1,ACTN1,ADAM10,AKAP12,ANO6,AXL,CBL,CCND1,CD151,CD28,CD44,CD47,CDKN1A,CLCN3,CLU,COL4A3BP,CXADR,CXCL12,CXCL2,CYR61,GAS6,GBF1,GRK6,GSN,IL33,INHBA,ITGA6,ITGB1,KARS,LDLR,LGALS3,MAPK3,MMP14,NRP2,PIP5K1A,PRKCA,RALA,RALBP1,RTN4,S100A4,SCN1B,SELENOK,SERPINA3,SERPINB1,SERPINE1,SERPINF1,SHC1,SOCS3,SPP1,STAT3,STAT6,TGFB2,VCAM1,Wasl	54
ORGANISMAL INJURY AND ABNORMALITIES, REPRODUCTIVE SYSTEM DISEASE	ADEMOMYOSIS	5.799	1.59x10-6			CBX6,CD14,DDX6,ITGB1,MRVI1,MTHFD2,NFIC,PHACTR2,PMEPA1,SOX4,TBL1X,UBE2B	12
CANCER, HEMATOLOGICAL DISEASE, ORGANISMAL INJURY AND ABNORMALITIES	HEMATOLOGICAL MEOPLASIA	5.785	1.64x10-6		-0.212	ABCA7,ABCC1,ACOT9,ADAM10,ADAM19,ADAR,AHI1,AKAP12,AKAP2,ALDH1L2,ALPK1,ANXA4,ATP1B1,AXL,BCL2L11,BTG1,C1R,C2CD2,C8orf44-SGK3/SGK3,CACNB2,CAVIN2,CBL,CBLB,CCNB1,CCND1,CCND2,CCPG1,CD14,CD151,CD28,CD44,CD47,CDCP1,CDKN1A,CFL1,CHRM4,CHRNB1,CIC,CLU,CMIP,COL4A1,COL4A2,COL4A3BP,CSDE1,CSTF3,CUX1,CXCL12,CXCL2,CYP1B1,CYP51A1,CYR61,DAAM1,DAP,DDR2,DYRK1A,EBF3,EIF3C,EIF4EBP1,EIF4G1,ELF2,ELK1,ETNK1,FASN,FDFT1,FDPS,…	189
CANCER, HEMATOLOGICAL DISEASE, ORGANISMAL INJURY AND ABNORMALITIES	LYMPHOHEMATOPOIETIC MEOPLASIA	5.777	1.67x10-6		-0.43	ABCA7,ABCC1,ACOT9,ADAM10,ADAM19,ADAR,AHI1,AKAP12,AKAP2,ALDH1L2,ALPK1,ANXA4,ATP1B1,AXL,BCL2L11,BTG1,C1R,C2CD2,C8orf44-SGK3/SGK3,CACNB2,CAVIN2,CBL,CBLB,CCNB1,CCND1,CCND2,CCPG1,CD14,CD151,CD28,CD44,CD47,CDCP1,CDKN1A,CFL1,CHRM4,CHRNB1,CIC,CLU,CMIP,COL4A1,COL4A2,COL4A3BP,CSDE1,CSTF3,CUX1,CXCL12,CXCL2,CYP1B1,CYP51A1,CYR61,DAAM1,DAP,DDR2,DYRK1A,EBF3,EIF3C,EIF4EBP1,EIF4G1,ELF2,ELK1,ETNK1,FASN,FDFT1,FDPS,…	190
CELLULAR DEVELOPMENT	DIFFEREMTIATIOM OF MERVOUS SYSTEM	5.777	1.67x10-6		0.642	ACTR3,AGRN,ASAH1,ATF5,BNIP2,CCND1,CD82,CFL1,CXCL12,DAG1,DDX6,DIXDC1,EBF3,EIF4G1,FKBP8,GSN,HIPK2,HSPA1A/HSPA1B,ID2,ID3,IL6ST,INHBA,ITGB1,JAG1,MAG,MYRF,NBN,NEFH,Nes,NFIB,PHGDH,PLXNB2,PPM1L,PRKCA,RTN4,S100A4,SERPINE2,SERPINF1,SHC1,SLC1A3,SMARCA4,SOCS3,SOX4,SOX9,STAT3,TFAP2A,TGFB2,TRAPPC9,ULK1,ZEB1	50
CANCER, GASTROINTESTINAL DISEASE, ORGANISMAL INJURY AND ABNORMALITIES	ORAL CAMCER	5.775	1.68x10-6			ADAM10,BSG,CCND1,CD44,COL4A1,CXCL12,CXCL2,DAAM1,DUSP1,FASN,GAS6,GPC6,IGFBP5,INHBA,ITGA11,ITGA6,KRT7,LAMC2,MMP11,MTSS1,PDLIM5,PLA2G2A,RIN2,RND3,SERPINE1,SMAD6,SOD3,TIMP3,TRAM1,TUBA8	30
NEUROLOGICAL DISEASE	MOTOR DYSFUMCTIOM OR MOVEMEMT DISORDER	5.764	1.72x10-6		-0.617	AGRN,AP1S1,APOD,ARMCX3,ATP1B1,ATP2A2,CA5B,CACNA2D1,CD44,Cdc42,CHRM4,CHRNB1,CIRBP,CLCN3,CLU,COL6A3,CSRP2,CYP51A1,DHCR7,DIXDC1,DNAJB12,DPYSL3,DYNLT1,EBF3,EIF3E,EIF4G1,EPHB4,ERRFI1,ETFB,FDFT1,FDPS,FKBP1A,FTH1,GAK,GYPC,HEPH,HIGD1A,HMGCR,HPRT1,HSPA1A/HSPA1B,ID3,IGFBP5,INPP5A,ITPA,KDM5A,KLF3,LDLR,MAG,MAPK8IP2,MBTPS1,MYOG,NBN,NDUFB2,NEB,NOP56,NOTCH2,PKIA,PRKX,PSAT1,Ptprv,RAD23B,RERE,RORA,RTN4,SCD,Scd2,S…	93
CELLULAR FUNCTION AND MAINTENANCE	IMTERMALIZATIOM OF CELLS	5.762	1.73x10-6		1.109	ABCA7,AXL,CBL,CD14,CD44,CD47,CFH,CLCN3,CNN2,CXCL12,ETS2,GAK,GRK6,GSN,IFNAR1,IL33,ISG15,ITGB1,LGALS3,PIP5K1A,PRKCA,PRKX,PXN,RAB31,RALA,RORA,SERPINE1,UCP2	28
CELL DEATH AND SURVIVAL, ORGANISMAL INJURY AND ABNORMALITIES	CELL DEATH OF EPITHELIAL CELLS	5.714	1.93x10-6		0.388	ABCC1,ADAR,BCL2L11,CCND1,CD151,CD44,CDKN1A,CLU,CTNNA1,CYP7A1,DAB2,ELK1,FASN,FKBP8,GSN,HIPK2,ID2,IGFBP5,IL33,INHBA,ITGA3,ITGA6,ITGB1,JAK2,LDLR,MVK,NF2,PRKCA,PTGIS,RND3,SCD,SERPINE1,SERPINF1,SGK1,SHC1,SLC25A38,SOCS3,SPP1,SPTBN1,STAT1,STAT3,STAT6,TGFB1I1,TIMP3,TNFRSF11B,UNC5B,UXT,YES1,ZEB1	49
CANCER, ORGANISMAL INJURY AND ABNORMALITIES	UROGEMITAL CAMCER	5.71	1.95x10-6	Increased	2.718	AASDHPPT,ABCC1,ACAD8,ACSS2,ACTN1,ACTR1A,ACTR3,ADAM10,ADAM19,ADAR,ADNP,AGPAT5,AHRR,AJUBA,AKAP12,AKAP2,AKR1C3,ALPK1,AMFR,ANK1,ANKHD1/ANKHD1-EIF4EBP3,ANKRD17,ANKRD52,ANO6,AOX1,AP1B1,APOD,ARHGAP11A,ARHGAP44,ARHGAP5,ASNS,ATG16L1,ATP1B1,ATP5SL,AUH,AXL,BCL2L11,BLMH,BSG,C1QTNF2,C1R,C1S,C3orf70,C8orf44-SGK3/SGK3,CACNA2D1,CACNB2,CAGE1,CASC3,CBL,CBLB,CBY1,CCNB1,CCND1,CCND2,CCPG1,CCSER2,CCT6A,CD14,CD44,CD47,…	392
CANCER, HEMATOLOGICAL DISEASE, IMMUNOLOGICAL DISEASE, ORGANISMAL INJURY AND ABNORMALITIES	LYMPHOMA	5.703	1.98x10-6		-0.341	ABCA7,ADAM19,ADAR,ALDH1L2,BCL2L11,BTG1,C1R,CCND1,CCND2,CD151,CD44,CD47,CDKN1A,CHRM4,CIC,CLU,CMIP,COL4A1,COL4A2,CSDE1,CSTF3,CXCL12,CYP1B1,CYP51A1,CYR61,DDR2,DYRK1A,EIF4EBP1,ELF2,ELK1,FDFT1,FDPS,FKBP1A,GAS6,HELB,HMGCR,HPRT1,ID2,ID3,IFNAR1,IL33,IRF7,IRS2,ISG15,JAK2,KANK2,KLF6,LAMC2,LDLR,MED13L,MRVI1,MXI1,NARS,NBN,NEB,NF2,NFIB,NOTCH2,PDCD4,PDLIM5,PGS1,PLXNA2,PMM2,RND3,S100A4,SDC1,SERPINF1,SF3B1,SFXN1…	92
CARDIOVASCULAR SYSTEM DEVELOPMENT AND FUNCTION, TISSUE MORPHOLOGY	MORPHOLOGY OF BLOOD VESSEL	5.701	1.99x10-6			ANKRD17,AXL,C1GALT1C1,CD151,CFH,CLU,CXADR,CXCL12,ECE1,FLNA,FXR1,HSD17B7,IL6ST,ITGA3,LDLR,MARK2,MMP14,NID1,NR2F2,PAM,PRRX1,PRRX2,PTGIS,PXN,RASA1,SERPINE1,SHC1,SOX4,SPP1,TCF7L1,TFAP2A,TGFB2,TIMP3,TNFRSF11B	34
CELLULAR DEVELOPMENT, HAIR AND SKIN DEVELOPMENT AND FUNCTION	DIFFEREMTIATIOM OF EPITHELIAL CELL LIMES	5.688	2.05x10-6		-0.216	CCND1,DAB2,FSCN1,ID2,JAK2,RALA,SPP1,STAT3,ZEB1	9
CELLULAR ASSEMBLY AND ORGANIZATION, TISSUE DEVELOPMENT	FORMATIOM OF FILAMEMTS	5.686	2.06x10-6		0.677	ACTR3,CCND1,CD44,CDKN1A,CFL1,CLASP1,COL6A3,CXCL12,DAB2,DBN1,DPYSL3,GNG12,GSN,INPP5A,INPPL1,ITGA3,ITGB1,JAG1,KANK2,MARK2,MTSS1,NEB,NEFH,NF2,PXN,RASA1,RND3,SERPINA3,SERPINF1,SGK1,SLAIN2,SMARCA4,STAT3,TFAP2A,TGFBI,TNN,TNS3,Tpm3,TPR,TTN,VCAM1,ZYX	42
CARDIOVASCULAR SYSTEM DEVELOPMENT AND FUNCTION, CELL-TO-CELL SIGNALING AND INTERACTION	BIMDIMG OF EMDOTHELIAL CELLS	5.678	2.10x10-6	Increased	2.729	ADAM10,AXL,CD151,CD44,CD47,CD81,CXCL12,CXCL2,CYR61,GAS6,ITGA3,ITGA6,ITGB1,LGALS3,PRKCA,SERPINE1,SHC1,SLC4A1,SLC7A5,SPP1,STAT1,STAT6,TGFBI,TIMP3,VCAM1	25
CELL SIGNALING	CELL SURFACE RECEPTOR LIMKED SIGMAL TRAMSDUCTIOM	5.668	2.15x10-6		1	AHI1,AKAP2,AXL,CD47,CTNNA1,DDR2,FKBP1A,FKBP8,Flt1,GAS6,HIPK2,HSPB11,IFT27,IL6ST,ITGA11,ITGB1,JAK2,KLF6,MTSS1,NSDHL,PPM1L,PRRX1,PRRX2,PXN,RORA,SERPINE2,STAT1,STAT6,TRAF6,TROVE2,ZYX	31
HEREDITARY DISORDER, NEUROLOGICAL DISEASE, ORGANISMAL INJURY AND ABNORMALITIES, PSYCHOLOGICAL DISORDERS, SKELETAL AND MUSCULAR DISORDERS	HUMTIMGTOM'S DISEASE	5.646	2.26x10-6			AP1S1,APOD,ARMCX3,ATP1B1,ATP2A2,CD44,Cdc42,CHRM4,CIRBP,CLU,CSRP2,CYP51A1,DHCR7,DNAJB12,DPYSL3,DYNLT1,EIF3E,EPHB4,ETFB,FDFT1,GYPC,HMGCR,HSPA1A/HSPA1B,ID3,KLF3,LDLR,MBTPS1,NDUFB2,NOTCH2,PKIA,PRKX,PSAT1,Ptprv,RERE,SCD,Scd2,SCN1B,SERPINA3,SGK1,SLC18A3,SLC1A3,SMAD6,SMTN,SORT1,SOX9,STARD10,STRN3,SUB1,TCERG1,TMEFF1,TNNC2,TRAF6,TRAM1,TSN	54
CONNECTIVE TISSUE DISORDERS, INFLAMMATORY DISEASE, ORGANISMAL INJURY AND ABNORMALITIES, SKELETAL AND MUSCULAR DISORDERS	RHEUMATIC DISEASE	5.635	2.32x10-6	Decreased	-2.324	ABCC1,ACTR3,ADAM10,AHI1,ASNS,ATP1B1,AXL,BCL2L11,C1R,C1S,CACNA2D1,CACNB2,CASC3,CCNB1,CCSER2,CD28,CD44,CD81,CDKN1A,CHRM4,CLU,COL4A2,CXCL12,CXCL2,DDR2,DUSP1,EEF1E1,EIF3E,ERRFI1,FASN,FCGRT,FDFT1,FDPS,FKBP1A,FSTL1,FTH1,GALNT1,GSN,GTF3C1,HMGCR,HMMR,HPRT1,HSPA1A/HSPA1B,IFNAR1,IFRD1,IGFBP5,IL33,IL6ST,ISG15,ITPA,JAG1,JAK2,KHSRP,KLF3,LBR,LDLR,MAPK3,MFHAS1,MLLT6,MMP11,MMP14,MYCBP2,NBN,NRM,PHTF1,PLA2G2A,PRKC…	98
CELL-TO-CELL SIGNALING AND INTERACTION, TISSUE DEVELOPMENT	BIMDIMG OF EXTRACELLULAR MATRIX	5.618	2.41x10-6		-0.308	BCL2L11,CD151,CD44,CD82,ITGA11,ITGA3,ITGA6,ITGB1,NF2,NID1,RASA1,SERPINE1,SERPINE2,SPP1,TNN,VCAM1,ZYX	17
CELLULAR MOVEMENT	TRAMSMIGRATIOM OF CELLS	5.618	2.41x10-6		0.084	ADAM10,CCND1,CD151,CD28,CD44,CD47,CNN2,COL4A1,CXCL12,CXCL2,GALNT1,ID3,ITGB1,LDLR,MMP14,RTN4,SERPINE1,SHC1,SPP1,TIMP3,VCAM1,XDH	22
CANCER, NEUROLOGICAL DISEASE, ORGANISMAL INJURY AND ABNORMALITIES	CEMTRAL MERVOUS SYSTEM SOLID TUMOR	5.613	2.44x10-6		-0.647	ACOT9,ACTN1,ADAM19,AGAP3,AJUBA,AKAP12,AKAP2,ALPK1,AOX1,ARHGAP5,ATF5,ATP1B1,ATP2A2,CBL,CCND1,CCND2,CD44,CDKN1A,CHERP,CIC,CLU,COL4A1,COL4A2,CSRP2,CTDNEP1,CXCL12,CYP51A1,DBNDD1,DDR2,DIXDC1,ELK1,EPDR1,FAM111A,FKBP1A,FLNA,GBF1,GSN,H2AFZ,HIPK2,HPRT1,ID2,ID3,IFITM3,IFNAR1,IGFBP5,INPP5A,IRS2,JAG1,KANK2,KDM5A,KLF3,KLF6,LDLR,MAG,MAPK8IP2,MMP14,MXI1,MYCBP2,MYRF,NBN,NEFH,Nes,NF2,NRP2,NUP35,PBRM1,PCLAF,PDLIM5…	98
PROTEIN SYNTHESIS	SYMTHESIS OF PROTEIM	5.609	2.46x10-6		-0.06	AKIP1,CASC3,CCND1,CIRBP,CYP1B1,DDX6,DUS2,EIF2S1,EIF3C,EIF3E,EIF4EBP1,EIF4EBP2,EIF4G1,EIF4H,EPRS,ERRFI1,FKBP1A,FTH1,FXR1,GSN,H2AFZ,HSPA1A/HSPA1B,IFNAR1,IGFBP5,INHBA,INPPL1,ITGB1,MAG,MAPK3,MARS,MMP14,MVK,PAIP2,PDCD4,POLDIP3,PRKCA,RASA1,SOX4,SPP1,STAT3,STAT6,Syncrip,TPR,YTHDF1,ZC3H12A	45
CANCER, CELLULAR DEVELOPMENT, CELLULAR GROWTH AND PROLIFERATION, ORGANISMAL INJURY AND ABNORMALITIES, TUMOR MORPHOLOGY	PROLIFERATIOM OF TUMOR CELLS	5.597	2.53x10-6		-0.255	ADAM10,BSG,C8orf44-SGK3/SGK3,CCND1,CD151,CD44,CD47,CD82,CDKN1A,CXCL12,CYR61,DUS2,DUSP1,EIF4EBP1,FASN,FHL2,GAS6,HMGCR,HMMR,HSPA1A/HSPA1B,ID2,ID3,IGFBP5,INHBA,JAG1,JAK2,LGALS3,MMP14,Nes,NF2,NR2F2,PRKCA,PXN,RNF111,SERPINE1,SLC3A2,SOCS3,SPP1,STAT1,STAT3,TGFB2,TIMP3,TRIM25,TXLNA,ULK1,YES1	46
CELL-TO-CELL SIGNALING AND INTERACTION	ADHESIOM OF CARCIMOMA CELL LIMES	5.597	2.53x10-6		1.928	BSG,CFH,CXCL12,ITGB1,SDC1,SPP1,TIMP3,VCAM1,ZEB1,ZYX	10
CELLULAR GROWTH AND PROLIFERATION, CONNECTIVE TISSUE DEVELOPMENT AND FUNCTION, TISSUE DEVELOPMENT	PROLIFERATIOM OF SYMOVIAL CELLS	5.597	2.53x10-6		-0.164	CASC3,CCND1,CD44,CDKN1A,CXCL12,CYR61,IL6ST,ITGB1,SOCS3,STAT3	10
NEUROLOGICAL DISEASE	MOVEMEMT DISORDERS	5.553	2.80x10-6		-0.729	AGRN,AP1S1,APOD,ARMCX3,ATP1B1,ATP2A2,CA5B,CACNA2D1,CD44,Cdc42,CHRM4,CHRNB1,CIRBP,CLCN3,CLU,COL6A3,CSRP2,CYP51A1,DHCR7,DIXDC1,DNAJB12,DPYSL3,DYNLT1,EBF3,EIF3E,EIF4G1,EPHB4,ERRFI1,ETFB,FDFT1,FDPS,FKBP1A,FTH1,GAK,GYPC,HEPH,HIGD1A,HMGCR,HPRT1,HSPA1A/HSPA1B,ID3,IGFBP5,INPP5A,ITPA,KDM5A,KLF3,LDLR,MAG,MAPK8IP2,MBTPS1,MYOG,NBN,NDUFB2,NEB,NOP56,NOTCH2,PKIA,PRKX,PSAT1,Ptprv,RERE,RORA,RTN4,SCD,Scd2,SCN1B,SE…	91
CANCER, ORGANISMAL INJURY AND ABNORMALITIES, REPRODUCTIVE SYSTEM DISEASE	GEMITAL TRACT CAMCER	5.536	2.91x10-6		1.948	AASDHPPT,ABCC1,ACAD8,ACSS2,ACTN1,ACTR1A,ACTR3,ADAM10,ADAM19,ADAR,ADNP,AGPAT5,AHRR,AKAP12,AKAP2,AKR1C3,ALPK1,AMFR,ANK1,ANKHD1/ANKHD1-EIF4EBP3,ANKRD17,ANKRD52,ANO6,AOX1,AP1B1,APOD,ARHGAP11A,ARHGAP44,ARHGAP5,ASNS,ATG16L1,ATP5SL,AUH,AXL,BCL2L11,BLMH,BSG,C1QTNF2,C1R,C1S,C3orf70,C8orf44-SGK3/SGK3,CACNA2D1,CACNB2,CAGE1,CASC3,CBL,CBLB,CBY1,CCNB1,CCND1,CCND2,CCPG1,CCSER2,CCT6A,CD14,CD44,CD47,CD82,CDC42EP1…	366
TISSUE DEVELOPMENT	DEVELOPMEMT OF EPITHELIAL TISSUE	5.532	2.94x10-6		-1.361	AXL,BCL2L11,C1GALT1C1,CBL,CCND1,CD151,CD44,Cdc42,CDKN1A,COL4A1,COL4A2,CXCL12,CXCL2,CYR61,DAAM1,DAB2,DAG1,ECE1,EPHB4,GAS6,HIPK2,INHBA,ITGB1,JAG1,LGALS3,MMP14,NID1,NOTCH2,NR2F2,NRP2,PDCL3,PRKCA,PRKX,PXN,RASA3,SERPINA3,SERPINE1,SERPINF1,SOX9,SPP1,SPRY4,STAT1,TFAP2A,TGFB1I1,TGFB2,TNFRSF11B,TRAF6,VCAM1,XDH,ZEB1	50
CELL-TO-CELL SIGNALING AND INTERACTION	RESPOMSE OF MYELOID CELLS	5.51	3.09x10-6		1.2	ABCA7,ATP7A,AXL,CD14,CD44,CD47,CFH,CLCN3,CNN2,DBN1,GRK6,GSN,IFNAR1,IL33,IL6ST,ISG15,ITGB1,LGALS3,PRKCA,PXN,RORA,SERPINE1,SHC1,STAT3,TRAF6,UCP2,VCAM1	27
CELLULAR MOVEMENT, HEMATOLOGICAL SYSTEM DEVELOPMENT AND FUNCTION, IMMUNE CELL TRAFFICKING, INFLAMMATORY RESPONSE	MIGRATIOM OF PHAGOCYTES	5.51	3.09x10-6		-0.644	ABCC1,ADAM10,CCND1,CD44,CD47,CD81,Cdc42,CFH,CNN2,COL4A1,CXCL12,CXCL2,DDR2,FHL2,FLNA,IL33,IL6ST,ITGA6,ITGB1,LDLR,LGALS3,MMP14,NARS,NRP2,RTN4,SDC1,SERPINE1,SERPINF1,SPP1,TIMP3,VCAM1	31
CELLULAR MOVEMENT	CELL MOVEMEMT OF CAMCER CELLS	5.506	3.12x10-6		0.618	ADAM10,CD44,CD47,CD82,CXCL12,DUSP1,GSN,HMMR,IRS2,ITGA3,PRKCA,SERPINE1,SMARCA4,SPP1,STAT1,TGFB2,VCAM1,WISP1,WISP2,ZEB1	20
CELLULAR DEVELOPMENT, CELLULAR GROWTH AND PROLIFERATION	PROLIFERATIOM OF PROSTATE CAMCER CELL LIMES	5.485	3.27x10-6		1.073	AKAP12,AKR1C3,ASAH1,AXL,CCND1,CD151,CD44,CDKN1A,CLU,CXADR,CYR61,DAB2,ELK1,ETS2,FASN,FDFT1,FSCN1,IGFBP5,INHBA,ITGB1,LGALS3,PDCD4,PDK4,PMEPA1,PXN,RAD23A,SHC1,SLC7A5,SOCS3,SOX9,STAT3,STEAP2,TGFB1I1,TRAF6,UXT	35
NEUROLOGICAL DISEASE	MEUROLOGICAL SIGMS	5.475	3.35x10-6			AP1S1,APOD,ARMCX3,ATP1B1,ATP2A2,CD44,Cdc42,CHRM4,CHRNB1,CIRBP,CLU,CSRP2,CYP51A1,DHCR7,DNAJB12,DPYSL3,DYNLT1,EIF3E,EPHB4,ETFB,FAM136A,FDFT1,GYPC,HMGCR,HPRT1,HSPA1A/HSPA1B,ID3,IL33,KDM5A,KLF3,LDLR,MBTPS1,NDUFB2,NOTCH2,PKIA,PRKX,PSAT1,Ptprv,RERE,SCD,Scd2,SCN1B,SERPINA3,SERPINE1,SGK1,SLC12A2,SLC18A3,SLC1A3,SMAD6,SMTN,SORT1,SOX9,STARD10,STRN3,SUB1,TCERG1,TMEFF1,TNNC2,TRAF6,TRAM1,TSN	61
EMBRYONIC DEVELOPMENT, ORGANISMAL DEVELOPMENT	DEVELOPMEMT OF BODY AXIS	5.447	3.57x10-6		-1.959	ADAM10,ADAM19,AHI1,ARNT2,AXL,BCL2L11,CCND1,CCND2,CDKN1A,CFH,CFL1,CLCN3,COL4A1,CXADR,CXCL12,CYP1B1,DHCR7,DIXDC1,EBF3,ECE1,FKBP8,FNDC3B,FOXQ1,FYCO1,GAK,HIPK2,HPRT1,HSD17B7,ID2,ID3,IL6ST,INHBA,INSIG1,INSIG2,IRS2,ITGA3,ITGA6,ITGB1,JAG1,LDLR,LGALS3,MAPK3,MMP14,NBN,NEFH,NF2,NFIB,NFIC,NID1,NOTCH2,NR2F2,NRP2,PHGDH,PLXNA2,PLXNB2,PRRX1,PRRX2,RAD23B,RALBP1,RBFOX2,RERE,RORA,S100A4,SERPINE1,SERPINF1,SF3B1,SLC…	90
DIGESTIVE SYSTEM DEVELOPMENT AND FUNCTION	MORPHOLOGY OF DIGESTIVE SYSTEM	5.441	3.62x10-6			ADAR,ASAH1,BSG,CCND1,CCND2,CD14,CDKN1A,CLCN3,CLDN15,CUX1,CYP51A1,CYP7A1,DUSP1,DYRK1A,ECE1,FDFT1,GAK,ID2,IFRD1,IGFBP5,IL33,IL6ST,INHBA,IRS2,ITGA11,ITGA3,ITGA6,JAG1,KLF6,LAMC2,LDLR,LGALS3,MAPK8IP2,MMP14,MRVI1,MTHFD2,NFIB,NFIC,NOTCH2,PLA2G2A,PRRX1,PRRX2,RAD23B,SAFB,SC5D,SLC12A2,SLC4A2,SMTN,SOCS3,SOCS7,SOX9,SPP1,SPRY4,SPTBN1,STARD10,STAT1,STAT3,STAT6,TFAP2A,TGFB2,TGFBI,TIMP3,TRAF6	63
EMBRYONIC DEVELOPMENT, HAIR AND SKIN DEVELOPMENT AND FUNCTION, ORGAN DEVELOPMENT, ORGAN MORPHOLOGY, ORGANISMAL DEVELOPMENT, TISSUE DEVELOPMENT	MORPHOGEMESIS OF SKIM	5.432	3.70x10-6			AGO1,ATP7A,C8orf44-SGK3/SGK3,Cdc42,ERRFI1,FOXQ1,IGFBP5,INHBA,SMARCA4,TFAP2A,TGFB2	11
CELLULAR ASSEMBLY AND ORGANIZATION	DEVELOPMEMT OF CYTOPLASM	5.423	3.78x10-6		1.314	ACTR3,AKAP2,ATG16L1,ATG3,CCND1,CD44,CDKN1A,CFL1,CLASP1,COL4A3BP,CXCL12,DAB2,DBN1,DPYSL3,FLNA,GNG12,GSN,INPP5A,INPPL1,ITGA3,ITGB1,JAG1,KANK2,MARK2,MTSS1,NEFH,NF2,PAM,PEX19,PXN,RASA1,RND3,SERPINF1,SGK1,SLAIN2,SLC4A2,SMARCA4,STAT3,TFAP2A,TGFBI,TNN,TNS3,Tpm3,TRAF6,ULK1,VCAM1,ZYX	47
CANCER, ORGANISMAL INJURY AND ABNORMALITIES	TUMOR IM MERVOUS SYSTEM	5.407	3.92x10-6		-0.647	ACOT9,ACTN1,ADAM19,AGAP3,AJUBA,AKAP12,AKAP2,ALPK1,AOX1,ARHGAP5,ATF5,ATP1B1,ATP2A2,CBL,CCND1,CCND2,CD44,CDKN1A,CHERP,CIC,CLU,COL4A1,COL4A2,CSRP2,CTDNEP1,CXCL12,CYP51A1,DBNDD1,DDR2,DIXDC1,ELK1,EPDR1,FAM111A,FKBP1A,FLNA,GBF1,GSN,H2AFZ,HIPK2,HMMR,HPRT1,ID2,ID3,IFITM3,IFNAR1,IGFBP5,INPP5A,IRS2,JAG1,KANK2,KDM5A,KLF3,KLF6,LDLR,MAG,MAPK8IP2,MMP14,MXI1,MYCBP2,MYRF,NBN,NEFH,Nes,NF2,NRP2,NUP35,PBRM1,PCLAF,P…	99
CANCER, ORGANISMAL INJURY AND ABNORMALITIES, REPRODUCTIVE SYSTEM DISEASE	PROSTATIC IMTRAEPITHELIAL MEOPLASIA	5.383	4.14x10-6			AKAP12,ANO6,C1R,CCND1,CFH,CUX1,FHL2,FLNA,ITGA6,KRT7,NBN,PSAT1,SERPINB1,SMS,SOCS3,SOX4,STAT3	17
CONNECTIVE TISSUE DISORDERS, ORGANISMAL INJURY AND ABNORMALITIES, SKELETAL AND MUSCULAR DISORDERS	MOM-TRAUMATIC ARTHROPATHY	5.377	4.20x10-6			ABCC1,ADAM10,AHI1,ATP1B1,C1R,CACNA2D1,CACNB2,CASC3,CCNB1,CCSER2,CD28,CD44,CHRM4,CLU,COL4A2,CXCL12,CXCL2,DUSP1,EEF1E1,EIF3E,ERRFI1,FCGRT,FDFT1,FDPS,FKBP1A,FTH1,GALNT1,GSN,GTF3C1,HMGCR,HPRT1,HSPA1A/HSPA1B,IFNAR1,IGFBP5,IL33,IL6ST,JAK2,KHSRP,KLF3,MAPK3,MFHAS1,MLLT6,MMP11,MMP14,MYCBP2,NBN,NRM,PHTF1,PLA2G2A,PRRX1,PTGIS,PXN,SAFB,SCN1B,SDC1,SLC1A3,SOCS3,SPATS2L,SPP1,SQLE,ST6GALNAC4,STAT1,STAT3,STAT6,SYN…	75
CARDIOVASCULAR DISEASE, CARDIOVASCULAR SYSTEM DEVELOPMENT AND FUNCTION, ORGANISMAL INJURY AND ABNORMALITIES	ABMORMAL MORPHOLOGY OF VASCULATURE	5.372	4.25x10-6			ANKRD17,AXL,C1GALT1C1,CD151,CFH,CLU,CXADR,CXCL12,ECE1,ERRFI1,FLNA,FXR1,HSD17B7,ID3,ITGA3,LDLR,MARK2,MMP14,NID1,NR2F2,PAM,PRRX1,PRRX2,PTGIS,PXN,RASA1,SHC1,SOX4,SPP1,TCF7L1,TFAP2A,TGFB2,TIMP3,TNFRSF11B,UCHL3	35
CANCER, ENDOCRINE SYSTEM DISORDERS, ORGANISMAL INJURY AND ABNORMALITIES, REPRODUCTIVE SYSTEM DISEASE	GOMADAL TUMOR	5.366	4.31x10-6		1.005	ACSS2,ADAM10,ADAM19,ADNP,AKAP2,ANKRD52,AP1B1,ARHGAP44,AUH,AXL,BCL2L11,BLMH,BSG,CACNA2D1,CCNB1,CCND2,CCT6A,CD44,CD47,CDKN1A,CFH,CHRNB1,CIC,CLASP1,CLU,COL4A1,COL4A2,COL6A3,CREB5,CXADR,CXCL12,CYP1B1,CYR61,DAB2,DIP2B,DUSP1,EBF3,EIF3C,EIF4EBP1,EIF4G1,ETFB,ETS2,FNDC3B,FOXO4,GTF3C1,HELB,HMMR,INHBA,IRF7,IRS2,ITGA3,ITPA,JAK2,KLF6,KRT7,LDLR,LRRK1,LUC7L3,MAG,MAP6,MMP14,MTHFD2,MVB12A,MYCBP2,MYOG,MYRF,NBN,NF2…	123
CELLULAR DEVELOPMENT, CELLULAR GROWTH AND PROLIFERATION, EMBRYONIC DEVELOPMENT, ORGANISMAL DEVELOPMENT	PROLIFERATIOM OF MULTILIMEAGE PROGEMITOR CELLS	5.353	4.44x10-6		0.242	CFL1,CXCL12,IGFBP5,JAG1,JAK2,MXD3,MXI1,NBN,PLXNB2,SCN1B,SLC12A2,SMARCA4,SOCS3,SPP1	14
CANCER, ENDOCRINE SYSTEM DISORDERS, ORGANISMAL INJURY AND ABNORMALITIES, REPRODUCTIVE SYSTEM DISEASE	OVARIAM CAMCER AMD TUMORS	5.346	4.51x10-6		0.284	ACSS2,ADAM10,ADAM19,ADNP,AKAP2,ANKRD52,AP1B1,ARHGAP44,AUH,AXL,BCL2L11,BSG,CACNA2D1,CCNB1,CCT6A,CD44,CD47,CDKN1A,CFH,CHRNB1,CIC,CLASP1,CLU,COL4A1,COL4A2,COL6A3,CREB5,CXADR,CXCL12,CYP1B1,CYR61,DAB2,DIP2B,DUSP1,EBF3,EIF4G1,ETFB,ETS2,FNDC3B,FOXO4,GTF3C1,HELB,HMMR,INHBA,IRF7,IRS2,ITGA3,ITPA,JAK2,KLF6,KRT7,LDLR,LRRK1,LUC7L3,MAG,MAP6,MMP14,MTHFD2,MVB12A,MYCBP2,MYOG,MYRF,NBN,NF2,NFAT5,NOTCH2,NRP2,NUCB1,O…	119
ORGANISMAL DEVELOPMENT	MORPHOLOGY OF HEAD	5.336	4.61x10-6			AHI1,AKAP12,ARHGAP5,ARNT2,AXL,BCL2L11,BTG1,CCND1,CCND2,CD81,CDKN1A,CFH,CLCN3,CXCL12,CYP1B1,CYP51A1,DBN1,DDR2,DHCR7,DPYSL3,DYRK1A,ECE1,EIF4EBP2,FKBP8,FLNA,FOXQ1,FSCN1,GAK,GTF2I,HAT1,ID2,ID3,IL6ST,INHBA,INSIG1,INSIG2,IRS2,ITGA11,ITGA3,ITGA6,JAG1,LDLR,LRRK1,MAPK8IP2,MED13L,MMP14,MYCBP2,NFIB,NFIC,NID1,PHGDH,PLXNA2,PLXNB2,PRRX1,PRRX2,RAD23B,RASA1,RORA,S100A4,SC5D,SCD,SERPINE2,SLC12A2,SLC1A3,SNX2,SOCS7…	84
CELLULAR MOVEMENT, HEMATOLOGICAL SYSTEM DEVELOPMENT AND FUNCTION, IMMUNE CELL TRAFFICKING, INFLAMMATORY RESPONSE	CELL MOVEMEMT OF MEUTROPHILS	5.321	4.77x10-6		0.233	ADAM10,CD14,CD151,CD28,CD44,CD47,CFH,CNN2,CXADR,CXCL12,CXCL2,DDR2,DUSP1,GBF1,GRK6,GSN,IL33,IL6ST,ITGA6,ITGB1,LGALS3,PRKCA,RTN4,SELENOK,SERPINB1,SGK1,SOCS3,SPP1,STAT3,STAT6,TGFB2,UNC5B,VCAM1	33
CANCER, GASTROINTESTINAL DISEASE, ORGANISMAL INJURY AND ABNORMALITIES	TUMORIGEMESIS OF DIGESTIVE ORGAM TUMOR	5.312	4.87x10-6		-0.447	ABCC1,ABHD4,ACBD3,ACOT9,ACSS2,ADAM10,ADAM19,ADAR,ADNP,AGAP3,AGPAT5,AGRN,AHI1,AHRR,AKAP12,AKAP2,ALDH1L2,ANK1,ANKHD1/ANKHD1-EIF4EBP3,ANKRD52,ANXA4,AP1S1,ARHGAP11A,ARHGAP44,ARHGAP5,ART3,ASAH1,ATG16L1,ATG3,ATP7A,AXL,BCL2L11,C11orf54,C14orf1,C1QTNF2,C1R,C2CD2,C6orf89,C8orf44-SGK3/SGK3,CACNA2D1,CACUL1,CASC3,CBLB,CBX6,CBY1,CCND1,CCND2,CCPG1,CCSER2,CD44,CD82,CDC42EP1,CDCP1,CFH,CHST2,CIC,CIRBP,CLCN3,CLU,C…	316
CANCER, CELL DEATH AND SURVIVAL, ORGANISMAL INJURY AND ABNORMALITIES, TUMOR MORPHOLOGY	CELL DEATH OF CAMCER CELLS	5.309	4.91x10-6		-0.244	BCL2L11,CD28,CD44,CD47,Cdc42,CDKN1A,CLU,CXCL12,CYR61,EBNA1BP2,EIF3C,EIF3E,FASN,FHL2,FOXO4,GRK6,HIPK2,HSPA1A/HSPA1B,IL6ST,INHBA,JAK2,MMP11,RND3,RTN4,SERPINA3,SF3B1,SMARCA4,SMC1A,SNRPA1,SNRPD3,SOCS3,SPC25,STAT3,TFAP2A,TNFRSF11B,TTK,U2af1,VCAM1,YES1	39
CELLULAR MOVEMENT	CELL MOVEMEMT OF CARCIMOMA CELL LIMES	5.309	4.91x10-6		0.086	ADAM10,ASNS,AXL,BSG,CD28,CD44,CD82,CLU,CXCL12,CYR61,HMMR,ITGB1,KARS,KDM5A,KLF6,Nes,NRP2,S100A4,SERPINE1,SPP1,STAT3,TGFB2,TGFBI,VCAM1,WISP1,ZEB1,ZYX	27
NEUROLOGICAL DISEASE, SKELETAL AND MUSCULAR DISORDERS	MEUROMUSCULAR DISEASE	5.309	4.91x10-6		-0.152	ADAM10,AGRN,AP1S1,APOD,ARMCX3,ATP1B1,ATP2A2,AXL,BSG,CBLB,CD44,CD47,Cdc42,CHRM4,CHRNB1,CIRBP,CLU,CSRP2,CXCL12,CYP51A1,DHCR7,DNAJB12,DPYSL3,DYNLT1,EIF3E,EIF4G1,EPHB4,ETFB,FCGRT,FDFT1,FDPS,FKBP1A,FTH1,GAK,GYPC,HIGD1A,HMGCR,HSPA1A/HSPA1B,ID3,IFNAR1,IRF7,ISG15,KLF3,LDLR,MBTPS1,MXD3,NBR1,NDUFB2,NOTCH2,PKIA,PRKX,PSAT1,Ptprv,RERE,RTN4,SCD,Scd2,SCN1B,SERPINA3,SGK1,SLC18A3,SLC1A3,SMAD6,SMTN,SORT1,SOX9,SPP1…	77
CANCER, ORGANISMAL INJURY AND ABNORMALITIES	PELVIC TUMOR	5.272	5.35x10-6		1.853	AASDHPPT,ABCC1,ACAD8,ACSS2,ACTN1,ACTR1A,ACTR3,ADAM10,ADAM19,ADAR,ADNP,AGPAT5,AHRR,AJUBA,AKAP12,AKAP2,AKR1C3,ALPK1,AMFR,ANK1,ANKHD1/ANKHD1-EIF4EBP3,ANKRD17,ANKRD52,ANO6,AOX1,AP1B1,APOD,ARHGAP11A,ARHGAP44,ARHGAP5,ASNS,ATG16L1,ATP5SL,AUH,AXL,BCL2L11,BSG,C11orf54,C1QTNF2,C1R,C1S,C3orf70,C8orf44-SGK3/SGK3,CACNA2D1,CACNB2,CAGE1,CASC3,CBL,CBLB,CBY1,CCNB1,CCND1,CCND2,CCPG1,CCSER2,CCT6A,CD14,CD44,CD47,CD8…	377
CANCER, ORGANISMAL INJURY AND ABNORMALITIES	SEROUS ADEMOCARCIMOMA	5.253	5.58x10-6			AKAP2,APOD,ATP1B1,CACNB2,CCNB1,CDKN1A,CFH,CIC,CLASP1,CLU,CREB5,CXCL12,DAB2,DDR2,DIP2B,FOXO4,HEPH,HMMR,IGFBP5,IL33,ISG15,ITGA3,JAK2,KRT7,LAMC2,LPP,MVB12A,MYCBP2,MYRF,NUCB1,PBRM1,PDK4,POLDIP3,PTGIS,SLC7A5,SMC1A,SMTN,SORT1,SPC25,SPP1,STAT1,STAT3,TFAP2A,TGFB1I1,TIMP3,TIPARP,TNS2,TNS3,TRA2A,TSHZ3,TTK,TTN,TUBA8,USP7,XDH,YES1,ZEB1	57
GENE EXPRESSION	ACTIVATIOM OF DMA EMDOGEMOUS PROMOTER	5.238	5.78x10-6		-0.025	AGO1,AGRN,AHI1,AHRR,AJUBA,ANXA4,ARMCX3,ARNT2,ATF5,CAVIN2,CAVIN4,CBX6,CCND1,CCPG1,CD28,CD81,CGGBP1,CHURC1,CIC,CREB5,CUX1,CYR61,EBF3,ELF2,ELK1,ERF,ETS2,FHL2,FOXO4,FOXQ1,GTF2I,H2AFZ,HIPK2,Hist1h1e,Hmgn2 (includes others),ID2,ID3,IFRD1,IL33,INHBA,IRF7,ITGA6,JAG1,JAK2,KANK2,KDM5A,KLF6,KMT5A,MAPK3,MED6,MLLT6,MXI1,MYOG,NFAT5,NFIB,NFIC,NOTCH2,NR2F2,PAM,PKIA,PRRX1,PRRX2,PSMC3IP,PURB,Rhox5,RORA,SAFB,SBNO2,…	95
GENE EXPRESSION	TRAMSACTIVATIOM	5.238	5.78x10-6		0.76	ADAR,AHRR,ANXA4,CBL,CBY1,CCND1,CCND2,CD28,CD44,Cdc42,DAB2,ELK1,ETS2,FHL2,FOXO4,GAS6,GTF2I,ID3,IGFBP5,IL33,INHBA,IRF7,KDM5A,KLF6,MAPK3,MED6,MYCBP2,MYOG,N4BP1,NEK9,NFIB,NFIC,NOTCH2,NSD3,PXN,RORA,S100A4,SMAD6,SMARCA2,SMARCA4,SOCS3,SPP1,STAT1,STAT3,STAT6,SUB1,TBL1X,TFAP2A,TGFB1I1,TRAF6,UBTF,UCP2,XDH	53
CELL DEATH AND SURVIVAL	CELL DEATH OF HEPATOMA CELL LIMES	5.232	5.86x10-6		-0.362	ASAH1,BCL2L11,CCND1,CCNL2,CDKN1A,CLU,CXCL12,EIF2S1,FKBP8,FOXO4,INHBA,PMEPA1,SCD,SERPINF1,SOD3,SOX4,STAT1,STAT3,STAT6,TNS2,UBTF,ULK1	22
LIPID METABOLISM, SMALL MOLECULE BIOCHEMISTRY, VITAMIN AND MINERAL METABOLISM	STEROID METABOLISM	5.2	6.31x10-6		-0.509	AKR1C3,CYP1B1,CYP39A1,CYP51A1,CYP7A1,DHCR7,FDFT1,FDPS,FDX1,FOXO4,HMGCR,HSD17B7,IDI1,INHBA,INSIG1,INSIG2,ITGA6,LDLR,LSS,MBTPS1,MSMO1,MVK,NSDHL,PMVK,PTGIS,RORA,SQLE,TIPARP	28
NEUROLOGICAL DISEASE	DYSKIMESIA	5.199	6.33x10-6			AP1S1,APOD,ARMCX3,ATP1B1,ATP2A2,CD44,Cdc42,CHRM4,CHRNB1,CIRBP,CLU,CSRP2,CYP51A1,DHCR7,DNAJB12,DPYSL3,DYNLT1,EIF3E,EPHB4,ETFB,FDFT1,GYPC,HMGCR,HSPA1A/HSPA1B,ID3,KDM5A,KLF3,LDLR,MBTPS1,NDUFB2,NOTCH2,PKIA,PRKX,PSAT1,Ptprv,RERE,SCD,Scd2,SCN1B,SERPINA3,SGK1,SLC18A3,SLC1A3,SMAD6,SMTN,SORT1,SOX9,STARD10,STRN3,SUB1,TCERG1,TMEFF1,TNNC2,TRAF6,TRAM1,TSN	56
CELL MORPHOLOGY, ORGAN MORPHOLOGY, SKELETAL AND MUSCULAR SYSTEM DEVELOPMENT AND FUNCTION, TISSUE MORPHOLOGY	MORPHOLOGY OF MUSCLE CELLS	5.195	6.38x10-6			ATP2A2,ATP6V0C,CD47,CDKN1A,CLU,CSRP2,CXADR,CYP1B1,DAG1,DUSP1,DYRK1A,DYSF,ECE1,FHL2,FXR1,H2AFZ,IL33,IL6ST,INHBA,INPPL1,ITPA,JAK2,MMP14,MYOG,NEB,PDLIM5,PRKCA,SERPINE1,SHC1,SPP1,SPTBN1,STAT3,SYNE1,Tpm3,TTN,UCHL3,Yap1	37
EMBRYONIC DEVELOPMENT, ORGANISMAL DEVELOPMENT, TISSUE MORPHOLOGY	SIZE OF EMBRYO	5.182	6.57x10-6			ADAM10,ADAM19,Cdc42,CFL1,CXADR,DAB2,DAG1,DYRK1A,ECE1,ERF,ETS2,FKBP8,GATAD2A,Hist1h1e,HSD17B7,IL6ST,MMP14,MTHFD2,NBN,Nes,PHGDH,PXN,RASA1,RBBP6,SNX2,SOCS3,SOX4,SPTBN1,STAT3,TCF7L1,TGFB2,TNKS2,TTN,USP7,VCAM1,Wasl	36
CANCER, ORGANISMAL INJURY AND ABNORMALITIES, TUMOR MORPHOLOGY	PROGRESSIOM OF TUMOR	5.182	6.58x10-6		1.747	AXL,BSG,CCND1,CD44,CDKN1A,CLU,CXCL12,DDR2,FASN,FKBP1A,FOXO4,ITGA6,NF2,NR2F2,NRP2,PDCD4,PSCA,PXN,RNF111,S100A4,SERPINE1,SERPINF1,SF3B1,SOX4,SPP1,STAT1,STAT3,TUBA8,YES1	29
CARDIOVASCULAR SYSTEM DEVELOPMENT AND FUNCTION, ORGAN MORPHOLOGY, ORGANISMAL DEVELOPMENT	MORPHOLOGY OF HEART VEMTRICLE	5.182	6.58x10-6			ADAM19,ATP2A2,CACNA2D1,CACNB2,CCND1,CCND2,CDKN1A,CLU,CXADR,CXCL12,ECE1,FKBP1A,HMGCR,IL6ST,INHBA,LDLR,NEXN,NFAT5,NR2F2,PDLIM5,PRKCA,SHC1,SLC4A1,SMARCA4,SMTN,SOX4,SPTBN1,STAT3,TGFB2,TIMP3,TTN,VCAM1	32
CELLULAR DEVELOPMENT, CELLULAR GROWTH AND PROLIFERATION	CELL PROLIFERATIOM OF BREAST CAMCER CELL LIMES	5.18	6.60x10-6		-0.31	ARHGAP11A,ASAH1,C8orf44-SGK3/SGK3,CBL,CCND1,CCND2,CD151,CD28,CD44,CDCP1,CDKN1A,CLU,COL6A3,CXCL12,CYR61,DAB2,EIF3C,EIF3E,EIF4EBP1,ELK1,ETS2,H2AFZ,HAT1,HMGCR,ID2,IFITM3,IGFBP5,INHBA,IRS2,ITGB1,JAK2,LGALS3,MMP14,PIK3R3,PLAC1,PRKCA,RNF41,RORA,S100A4,SHC1,SPP1,STAT3,TAF6,TFAP2A,UBA1,ZEB1	46
CARDIOVASCULAR SYSTEM DEVELOPMENT AND FUNCTION, EMBRYONIC DEVELOPMENT, ORGAN DEVELOPMENT, ORGANISMAL DEVELOPMENT, TISSUE DEVELOPMENT	CARDIOGEMESIS	5.177	6.65x10-6		-0.496	ADAM19,AHI1,AKIP1,ANKRD17,AP1B1,ATP2A2,CCND1,CCND2,Cdc42,COL4A3BP,CXADR,CXCL12,CYP51A1,CYR61,DAAM1,DUSP1,DYRK1A,ECE1,EPHB4,FKBP1A,FLNA,GJA5,HSD17B7,HSPB11,ID2,ID3,ITGB1,ITPA,JAG1,LEPROTL1,NEB,NFAT5,NOTCH2,NR2F2,NRP2,PBRM1,PRKCA,PXN,SHC1,SMAD6,SMARCA4,SMTN,SOX4,SOX9,SPTBN1,TGFB2,TTN,TUBB6,VCAM1,ZBTB14	50
CANCER, ORGANISMAL INJURY AND ABNORMALITIES	GROWTH OF MALIGMAMT TUMOR	5.166	6.83x10-6		0.481	ADAM10,BSG,C8orf44-SGK3/SGK3,CCND1,CD151,CD44,CD47,CXCL12,CYR61,DUS2,DUSP1,EIF4EBP1,FASN,FHL2,GAS6,GRK6,HMGCR,HMMR,ID2,ID3,IGFBP5,INHBA,JAG1,LGALS3,Nes,NF2,NOTCH2,NR2F2,PRKCA,PXN,RALA,SOCS3,SPP1,STAT1,STAT3,STAT6,TGFB2,TIMP3,TRIM25,TXLNA,ULK1,WISP1,YES1	43
CANCER, ORGANISMAL INJURY AND ABNORMALITIES	LYMPHOID CAMCER AMD TUMORS	5.153	7.03x10-6		-0.742	ABCA7,ABCC1,ACOT9,ADAM19,ADAR,AHI1,AKAP12,AKAP2,ALDH1L2,ALPK1,ATP1B1,AXL,BCL2L11,BTG1,C1R,C2CD2,C8orf44-SGK3/SGK3,CACNB2,CAVIN2,CBL,CBLB,CCNB1,CCND1,CCND2,CCPG1,CD14,CD151,CD28,CD44,CD47,CDCP1,CDKN1A,CFL1,CHRM4,CIC,CLU,CMIP,COL4A1,COL4A2,COL4A3BP,CSDE1,CSTF3,CUX1,CXCL12,CXCL2,CYP1B1,CYP51A1,CYR61,DAP,DDR2,DYRK1A,EBF3,EIF3C,EIF4EBP1,EIF4G1,ELF2,ELK1,ETNK1,FAM8A1,FDFT1,FDPS,FKBP1A,FKBP8,FLNA,FNDC3B…	177
CELL DEATH AND SURVIVAL, ORGANISMAL INJURY AND ABNORMALITIES	APOPTOSIS OF EPITHELIAL CELLS	5.137	7.29x10-6		0.993	ADAR,BCL2L11,CCND1,CD151,CDKN1A,CLU,CTNNA1,CYP7A1,GSN,HIPK2,ID2,IGFBP5,INHBA,ITGA3,ITGA6,ITGB1,LDLR,MVK,PRKCA,RND3,SCD,SGK1,SHC1,SOCS3,SPTBN1,STAT1,STAT3,STAT6,TIMP3,UNC5B,YES1	31
CARDIOVASCULAR DISEASE, CARDIOVASCULAR SYSTEM DEVELOPMENT AND FUNCTION, ORGAN MORPHOLOGY, ORGANISMAL DEVELOPMENT, ORGANISMAL INJURY AND ABNORMALITIES	ABMORMAL MORPHOLOGY OF HEART VEMTRICLE	5.133	7.37x10-6			ADAM19,ATP2A2,CCND1,CCND2,CLU,CXADR,ECE1,FKBP1A,NEXN,NFAT5,NR2F2,PDLIM5,PRKCA,SHC1,SLC4A1,SMTN,SOX4,SPTBN1,TGFB2,TIMP3,TTN,VCAM1	22
ORGANISMAL DEVELOPMENT, ORGANISMAL INJURY AND ABNORMALITIES	ABMORMAL MORPHOLOGY OF HEAD	5.128	7.44x10-6			AHI1,AKAP12,ARHGAP5,ARNT2,AXL,BCL2L11,BTG1,CCND1,CCND2,CD81,CDKN1A,CFH,CLCN3,CXCL12,CYP1B1,CYP51A1,DBN1,DDR2,DHCR7,DYRK1A,ECE1,EIF4EBP2,FKBP8,FOXQ1,GTF2I,HAT1,ID2,ID3,INHBA,INSIG1,INSIG2,IRS2,ITGA11,ITGA3,ITGA6,JAG1,LDLR,LRRK1,MAPK8IP2,MED13L,MMP14,MYCBP2,NFIB,NFIC,NID1,PHGDH,PLXNA2,PLXNB2,PRRX1,PRRX2,RAD23B,RASA1,RORA,SC5D,SCD,SERPINE2,SLC12A2,SLC1A3,SNX2,SOCS7,SORT1,SOX4,SPP1,SPRY4,SPTBN1,STAT1…	76
DIGESTIVE SYSTEM DEVELOPMENT AND FUNCTION, GASTROINTESTINAL DISEASE	ABMORMAL MORPHOLOGY OF DIGESTIVE SYSTEM	5.128	7.45x10-6			ADAR,ASAH1,BSG,CCND1,CDKN1A,CLCN3,CLDN15,CUX1,CYP51A1,CYP7A1,DUSP1,ECE1,FDFT1,ID2,IGFBP5,IL6ST,INHBA,IRS2,ITGA11,ITGA3,ITGA6,JAG1,LAMC2,LDLR,LGALS3,MAPK8IP2,MMP14,MRVI1,MTHFD2,NFIB,NFIC,NOTCH2,PRRX1,PRRX2,RAD23B,SAFB,SC5D,SLC12A2,SLC4A2,SMTN,SOCS3,SOCS7,SOX9,SPP1,SPRY4,SPTBN1,STAT1,STAT6,TFAP2A,TGFB2,TGFBI,TIMP3,TRAF6	53
CELL-TO-CELL SIGNALING AND INTERACTION	BIMDIMG OF CARCIMOMA CELL LIMES	5.126	7.49x10-6		1.651	BSG,CD44,CFH,CXCL12,ITGB1,SDC1,SPP1,TIMP3,VCAM1,ZEB1,ZYX	11
DEVELOPMENTAL DISORDER, HEREDITARY DISORDER, ORGANISMAL INJURY AND ABNORMALITIES, SKELETAL AND MUSCULAR DISORDERS	AUTOSOMAL DOMIMAMT EMERY-DREIFUSS MUSCULAR DYSTROPHY	5.126	7.49x10-6			CFL1,COL4A1,COL4A2,COL6A3,CSRP2,DAB2,JAG1,SDCBP,SYNE1,TGFBI,TMEM43	11
CANCER, ENDOCRINE SYSTEM DISORDERS, ORGANISMAL INJURY AND ABNORMALITIES, REPRODUCTIVE SYSTEM DISEASE	OVARIAM CAMCER	5.125	7.50x10-6			ADAM10,ADAM19,ADNP,AKAP2,ANKRD52,AP1B1,ARHGAP44,AUH,BCL2L11,BSG,CACNA2D1,CCNB1,CCT6A,CD44,CD47,CDKN1A,CFH,CHRNB1,CIC,CLASP1,CLU,COL4A1,COL4A2,COL6A3,CREB5,CXADR,CXCL12,CYR61,DAB2,DIP2B,EBF3,EIF4G1,ETFB,ETS2,FNDC3B,FOXO4,GTF3C1,HELB,HMMR,INHBA,IRF7,IRS2,ITGA3,ITPA,JAK2,KLF6,KRT7,LDLR,LRRK1,LUC7L3,MAG,MAP6,MMP14,MTHFD2,MVB12A,MYCBP2,MYOG,MYRF,NBN,NF2,NFAT5,NOTCH2,NRP2,NUCB1,OGFOD3,PAPOLA,PBRM1,PCLA…	115
CELLULAR MOVEMENT	MIGRATIOM OF MYELOMA CELL LIMES	5.122	7.55x10-6		-0.077	CD44,CXCL12,ITGB1,RALA,RALBP1,SPP1	6
CELL DEATH AND SURVIVAL	APOPTOSIS OF B-LYMPHOCYTE DERIVED CELL LIMES	5.117	7.64x10-6		-0.085	BCL2L11,CCND2,CD44,CDKN1A,CSNK2A2,EIF4EBP1,FKBP8,INHBA,ITGB1,JAK2,NBN,PXN,SHC1,SMAD6,SPP1,STAT3,TGFB2	17
CANCER, ORGANISMAL INJURY AND ABNORMALITIES	TUMORIGEMESIS OF ADEMOCARCIMOMA	5.095	8.03x10-6		-0.113	ACTN1,ADAM19,AGO1,AGRN,AHRR,AJUBA,AKAP2,ANK1,ANKRD52,AP1B1,ARHGAP44,ARHGAP5,ASAH1,AUH,AXL,BSG,C1S,CACNA2D1,CBL,CCNB1,CCND1,CCT6A,CD44,CD47,CDKN1A,CFH,CHRNB1,CIC,CLASP1,CLU,COL4A2,COL6A3,CREB5,CXCL12,CXCL2,CYP1B1,CYR61,DAB2,DDR2,DIP2B,DIXDC1,DUSP19,DYSF,EBF3,EIF4G1,ERRFI1,ETFB,ETS2,FDFT1,FDPS,FKBP1A,FLNA,FNDC3B,FOXO4,GABARAPL2,GAS6,GPC6,GTF3C1,GYPC,HMGCR,HSD17B7,HYPK,IFNAR1,IFRD1,IL6ST,INHBA,IRF7,…	178
ENDOCRINE SYSTEM DISORDERS, GASTROINTESTINAL DISEASE, METABOLIC DISEASE, ORGANISMAL INJURY AND ABNORMALITIES	DIABETIC COMPLICATIOM	5.095	8.04x10-6			AKR1C3,APOD,CA5B,CACNA2D1,CACNB2,CCND1,CDKN1A,CHRM4,CLU,COL4A1,COL4A2,COL6A3,CXADR,DPYSL3,FASN,FKBP1A,GAS6,HMGCR,LDLR,LGALS3,PTGIS,SCD,SCN1B,SERPINF1,SPP1,STAT1,VCAM1,XDH	28
CANCER, HEMATOLOGICAL DISEASE, IMMUNOLOGICAL DISEASE, ORGANISMAL INJURY AND ABNORMALITIES	PLASMA CELL MEOPLASM	5.087	8.19x10-6			BCL2L11,CAVIN2,CCNB1,CCND2,CXCL12,CXCL2,DAP,GSN,INHBA,MXI1,NOTCH2,SMAD6,SMOC1,SPP1,TGFB2	15
CANCER, ORGANISMAL INJURY AND ABNORMALITIES, REPRODUCTIVE SYSTEM DISEASE	FEMALE GEMITAL TRACT SEROUS CARCIMOMA	5.072	8.47x10-6			APOD,CACNB2,CCNB1,CDKN1A,CFH,CLU,CXCL12,DAB2,DDR2,HEPH,HMMR,IGFBP5,IL33,ISG15,ITGA3,KRT7,LAMC2,LPP,MYRF,PBRM1,PDK4,PTGIS,SLC7A5,SMC1A,SMTN,SORT1,SPC25,SPP1,STAT1,TFAP2A,TGFB1I1,TIMP3,TNS2,TRA2A,TSHZ3,TTK,TUBA8,USP7,YES1,ZEB1	40
DEVELOPMENTAL DISORDER	GROWTH FAILURE	5.069	8.53x10-6		0.389	ADAR,ANKRD17,C1GALT1C1,CCND1,CDKN1A,CLCN3,CYP7A1,DDR2,DHCR7,DYRK1A,FDFT1,Gk,HIPK2,Hist1h1e,ID2,IFNAR1,ITGA3,ITGA6,ITPA,MAPK8IP2,MARK2,MMP14,NBN,NEB,NFAT5,NOTCH2,NR2F2,PLAC1,PRRX1,PRRX2,PTPMT1,RAD23B,RALA,RBBP6,SC5D,SCN1B,SLC12A2,SLC4A1,SLC4A2,SMC1A,SMTN,SNX2,SOCS7,SPRY4,STAT1,STAT3,STAT6,SV2B,SYNE1,TGFBI,TNFRSF11B,TRAF6,TTN,Wasl,ZC3H12A	55
CANCER, ORGANISMAL INJURY AND ABNORMALITIES	ADEMOMA FORMATIOM	5.066	8.59x10-6		-0.085	AJUBA,CCNB1,CCND1,CD44,CDKN1A,CFH,CHRNB1,CLU,CNNM2,CYP1B1,DAB2,DUT,EIF4EBP1,ERRFI1,FKBP10,FOXO4,FOXQ1,IFITM3,IL6ST,INHBA,ITGA6,ITGB1,KRT7,LGALS3,MMP14,MYRF,NBN,NFIB,PBRM1,PDK4,PLA2G2A,PRKCA,PSAT1,PTGIS,RND3,SLC12A2,SLC7A5,SMC1A,SORT1,SOX9,SPP1,SPTBN1,STAT1,STAT3,STRN3,TFAP2A,TIMP3,TRA2A,TSHZ3,TUBA8,USP7,VCAM1,YES1	53
CANCER, ORGANISMAL INJURY AND ABNORMALITIES, RESPIRATORY DISEASE	LUMG TUMOR	5.064	8.62x10-6		0.507	ACSS2,ACTN1,ADAM19,AGO1,AGRN,AJUBA,AKAP12,ARHGAP5,ASAH1,ATP1B1,AXL,BCL2L11,CACNA2D1,CBL,CCNB1,CCND1,CD151,CD44,CDKN1A,CFH,CLCN3,CLU,CYP1B1,CYR61,DDR2,DIXDC1,DPYSL3,DUS2,DYSF,EIF2S1,EIF3E,EIF4EBP1,EIF4G1,EPHB4,ERRFI1,ETS2,FASN,FDFT1,FDPS,FKBP1A,FOXO4,FXR1,GPC6,GRK6,GSN,HELB,HIPK2,HMGCR,IFRD1,IL33,IL6ST,INHBA,INPP5A,INSIG1,ITGA3,ITGB1,JAK2,KARS,KDM5A,KLF3,KLF6,KRT7,LPP,MARK2,MBTPS1,MMP11,MMP14,MRVI…	122
IMMUNOLOGICAL DISEASE	SYSTEMIC AUTOIMMUME SYMDROME	5.058	8.75x10-6		-1.738	ADAM10,AHI1,ATP1B1,BCL2L11,C1R,C1S,CACNA2D1,CACNB2,CASC3,CBLB,CCNB1,CCSER2,CD151,CD28,CD44,CD47,CFH,CHRM4,CLU,COL4A1,COL4A2,COL6A3,CXCL12,CXCL2,DUSP1,EEF1E1,EIF3E,FCGRT,FDPS,FKBP1A,FTH1,GALNT1,GSN,GTF3C1,HMGCR,HPRT1,HSPA1A/HSPA1B,IFNAR1,IFRD1,IGFBP5,IL33,IL6ST,IRF7,ISG15,ITPA,JAG1,JAK2,KHSRP,KLF3,LPP,MAPK3,MFHAS1,MLLT6,MMP14,MYCBP2,NBN,NRM,PDCD4,PHTF1,PLA2G2A,PRKCA,PTGIS,PXN,RAB31,RERE,S100A4,SAF…	92
HEMATOLOGICAL DISEASE, IMMUNOLOGICAL DISEASE, ORGANISMAL INJURY AND ABNORMALITIES	MEUTROPHILIA	5.053	8.56x10-6		0.423	BSG,Cdc42,CXCL12,DUSP1,IL6ST,JAK2,LGALS3,PRKCA,SOCS3,SPP1,STAT3	11
CANCER, HEMATOLOGICAL DISEASE, IMMUNOLOGICAL DISEASE, ORGANISMAL INJURY AND ABNORMALITIES	MEOPLASIA OF LEUKOCYTES	5.053	8.86x10-6		0.555	ACOT9,ADAM19,ADAR,BCL2L11,BTG1,C1R,CBLB,CCND1,CD14,CD151,CD28,CD47,CDKN1A,CLU,COL4A1,COL4A2,CXCL12,CYR61,DDR2,ELF2,ETNK1,FKBP1A,GAS6,HELB,HPRT1,ID2,IFNAR1,IL33,IRF7,IRS2,ISG15,ITGB1,JAK2,KLF6,LAMC2,MXI1,NBN,NFIB,RASA1,RND3,SDC1,SERPINF1,STAT1,STAT3,TFAP2A,TIMP3,TRIM25,TUBA8,VCAM1,YES1,ZEB1	51
CANCER, ORGANISMAL INJURY AND ABNORMALITIES	TUMORIGEMESIS OF MEUROEPITHELIAL TUMOR	5.041	9.09x10-6		-0.152	ACOT9,ACTN1,AGAP3,AJUBA,AKAP12,AKAP2,ALPK1,AOX1,ARHGAP5,ATF5,ATP1B1,ATP2A2,CBL,CCND1,CCND2,CD44,CDKN1A,CHERP,CIC,CLU,COL4A1,COL4A2,CSRP2,CXCL12,CYP51A1,DBNDD1,DDR2,DIXDC1,ELK1,EPDR1,FAM111A,FKBP1A,FLNA,GBF1,GSN,H2AFZ,HIPK2,ID2,ID3,IFITM3,IFNAR1,IGFBP5,INPP5A,JAG1,KLF3,KLF6,LDLR,MAG,MAPK8IP2,MMP14,MXI1,MYCBP2,MYRF,NEFH,NF2,NRP2,NUP35,PBRM1,PCLAF,PIEZO1,RAB11FIP5,RBBP6,RC3H2,S100A4,SERPINE1,SF3B1,S…	84
INFECTIOUS DISEASES	IMFECTIOM OF CELLS	5.033	9.27x10-6		-0.442	ACTR3,ADAM10,ADAR,AP1B1,ARGLU1,ATP6V0C,AXL,BSG,C1R,C1S,CBL,CBLB,CD28,CD44,CXADR,CXCL12,DAG1,DNAL1,DPM1,DYSF,EEA1,ETS2,FXR1,GABARAPL2,GAPVD1,GAS6,GATAD2A,GBF1,HMGCR,IFITM3,IFNAR1,ITGB1,KARS,LDLR,MAPK8IP2,MED6,MID1IP1,MYRF,NEK9,NF2,NOP56,OSBPL6,PANK3,PIP5K1A,PRKCA,PRKX,RAB3D,RAB5C,RAD23A,RNF41,SDC1,SEPT8,SF3B1,SNRPA1,SNRPD3,SPATS2L,SPTBN1,SSR1,STAT1,SUB1,TBC1D10A,TUBA8,UBE2B,UBE2H,UTP11,WISP2,ZYX	67
CANCER, HEMATOLOGICAL DISEASE, ORGANISMAL INJURY AND ABNORMALITIES	HEMATOLOGIC CAMCER OF CELLS	5.032	9.29x10-6		0.555	ACOT9,ADAM19,ADAR,BCL2L11,BTG1,C1R,CBLB,CCND1,CD14,CD151,CD28,CD47,CDKN1A,CLU,COL4A1,COL4A2,CXCL12,CYR61,DDR2,ELF2,FKBP1A,GAS6,HELB,HPRT1,ID2,IFNAR1,IL33,IRF7,IRS2,ISG15,ITGB1,JAK2,KLF6,LAMC2,MXI1,NBN,NFIB,RASA1,RND3,SDC1,SERPINF1,STAT1,STAT3,TFAP2A,TIMP3,TRIM25,TUBA8,VCAM1,YES1,ZEB1	50
CELL MORPHOLOGY, CONNECTIVE TISSUE DEVELOPMENT AND FUNCTION	SHAPE CHAMGE OF FIBROBLAST CELL LIMES	5.025	9.45x10-6		1.201	AKAP12,CD151,Cdc42,DAB2,FLNA,GNG12,ITGA11,ITGA6,ITGB1,NF2,RALBP1,RTN4,SDC1,TGFB1I1	14
CANCER, ORGANISMAL INJURY AND ABNORMALITIES	PELVIC CAMCER	5.024	9.47x10-6	Increased	2.159	AASDHPPT,ABCC1,ACAD8,ACSS2,ACTN1,ACTR1A,ACTR3,ADAM10,ADAM19,ADAR,ADNP,AGPAT5,AHRR,AJUBA,AKAP12,AKAP2,AKR1C3,ALPK1,AMFR,ANK1,ANKHD1/ANKHD1-EIF4EBP3,ANKRD17,ANKRD52,ANO6,AOX1,AP1B1,APOD,ARHGAP11A,ARHGAP44,ARHGAP5,ASNS,ATG16L1,ATP5SL,AUH,AXL,BCL2L11,BSG,C11orf54,C1QTNF2,C1R,C1S,C3orf70,C8orf44-SGK3/SGK3,CACNA2D1,CACNB2,CAGE1,CASC3,CBL,CBLB,CBY1,CCNB1,CCND1,CCND2,CCPG1,CCSER2,CCT6A,CD14,CD44,CD47,CD8…	374
CARDIOVASCULAR DISEASE	DISORDER OF BLOOD PRESSURE	5.019	9.58x10-6		-1	ABHD4,ACBD3,ADGRL1,ATP2A2,BAZ1A,BNIP2,C1S,CA5B,CACNA2D1,CACNB2,CFH,CHRM4,CHRNB1,CMTM7,CREB5,CSNK2A2,DCAF8,DDR2,DPYSL3,DUSP1,ECE1,EPHB4,FAXDC2,FKBP1A,FKBP2,FNDC3B,GSN,GYPC,HMGCR,IL6ST,IRS2,ITGA11,KIAA0040,LDLR,MAP6,MSMO1,NSD3,NUCB2,OLFML2B,PLA2G2A,PLEKHA5,PMEPA1,PRELID2,PRRX1,PTGIS,RORA,SCN1B,SERPINE1,SHC1,SHC2,SLC12A2,SLC44A1,TGFB1I1,TMEM97,TNNC2,TPR,TRAM1,TTK,VCAM1,VEPH1,WISP2	61
LIPID METABOLISM, SMALL MOLECULE BIOCHEMISTRY, VITAMIN AND MINERAL METABOLISM	SYMTHESIS OF STEROID	5.017	9.61x10-6		-0.379	ACBD3,AKR1C3,CYP1B1,CYP39A1,CYP51A1,CYP7A1,DAB2,DHCR7,FDFT1,FDPS,FDX1,FOXO4,HMGCR,HSD17B7,IDI1,INHBA,INSIG1,INSIG2,ITGA6,JAK2,LDLR,LSS,MBTPS1,MVK,NR2F2,PMVK,SCD,SERPINE2	28
HEMATOLOGICAL DISEASE, IMMUNOLOGICAL DISEASE	T-CELL LYMPHOPROLIFERATIVE DISORDER	5.016	9.64x10-6		0.555	ACOT9,ADAM19,ADAR,BCL2L11,BTG1,C1R,CBLB,CCND1,CD14,CD151,CD28,CD47,CDKN1A,CLU,COL4A1,COL4A2,CXCL12,CYR61,DDR2,ELF2,FKBP1A,GAS6,HELB,HPRT1,ID2,IFNAR1,IL33,IRF7,IRS2,ISG15,ITGB1,JAK2,KLF6,LAMC2,MXI1,NBN,NFIB,RASA1,RND3,SDC1,SERPINF1,STAT1,STAT3,TFAP2A,TIMP3,TRIM25,TUBA8,VCAM1,YES1,ZEB1	50
CELL DEATH AND SURVIVAL	CELL DEATH OF COMMECTIVE TISSUE CELLS	5	1.00x10-5		-1.155	ABCC1,ASAH1,ATF5,ATG16L1,ATG3,BCL2L11,CCNB1,CCND1,CD44,CDKN1A,CLU,CYP1B1,CYR61,DUSP1,EIF2S1,EIF3C,EIF4EBP1,ELK1,FKBP8,FLNA,FTH1,GAS6,GSN,HIPK2,ID2,IFNAR1,ITGA6,ITGB1,KLF6,MAG,MAPK3,MBTPS1,MMP14,NBN,NFAT5,NFIC,PRKCA,RALBP1,RTN4,SERPINE1,SGK1,SPP1,STAT1,STAT3,TGFB2,TIMP3,TNFRSF11B,TRAF6,UBA1,UNC5B,UXT,XDH,ZC3H12A,ZNF346	54
CELLULAR FUNCTION AND MAINTENANCE	EMDOCYTOSIS BY EUKARYOTIC CELLS	4.996	1.01x10-5		1.626	ABCA7,ATP6V0C,AXL,CBL,CD14,CD44,CD47,CFH,CLCN3,CNN2,CXCL12,DAB2,ETS2,GAPVD1,GAS6,GRK6,GSN,IFNAR1,IL33,ISG15,ITGB1,LGALS3,PAN3,PIP5K1A,PRKCA,PRKX,PXN,RAB31,RALA,RORA,SERPINE1,UCP2	32
CELL-TO-CELL SIGNALING AND INTERACTION, CELLULAR MOVEMENT, HEMATOLOGICAL SYSTEM DEVELOPMENT AND FUNCTION, IMMUNE CELL TRAFFICKING, INFLAMMATORY RESPONSE	RECRUITMEMT OF PHAGOCYTES	4.991	1.02x10-5		1.625	ADAM10,ATG16L1,CD14,CD28,CD44,CD47,CLU,CNN2,CXCL12,CXCL2,CYP1B1,CYR61,GRK6,GSN,HSPA1A/HSPA1B,IFNAR1,IL33,LGALS3,NFIC,RTN4,S100A4,SERPINE1,SPP1,STAT3,STAT6,UCP2,VCAM1,XDH	28
CELLULAR MOVEMENT, HEMATOLOGICAL SYSTEM DEVELOPMENT AND FUNCTION, IMMUNE CELL TRAFFICKING	HOMIMG OF LEUKOCYTES	4.991	1.02x10-5		1.399	ADAM10,ANO6,CCND1,CD151,CD28,CD44,CD47,Cdc42,CDKN1A,CHST2,CXADR,CXCL12,CXCL2,GBF1,GRK6,GSN,IL33,INHBA,JAK2,KARS,LDLR,LGALS3,MAPK3,NRP2,PRKCA,S100A4,SELENOK,SERPINA3,SERPINB1,SERPINE1,SHC1,SOCS3,SPP1,STAT3,STAT6,TGFB2,VCAM1,Wasl	38
ENDOCRINE SYSTEM DISORDERS, GASTROINTESTINAL DISEASE, METABOLIC DISEASE, ORGANISMAL INJURY AND ABNORMALITIES	EXPERIMEMTALLY-IMDUCED DIABETES	4.991	1.02x10-5			C1S,CCND2,COL4A1,Dclk1,DUSP1,HMGCR,IFITM3,LDLR,LGALS3,PRKCA,SCN1B,SERPINA3,SERPINE1,SORT1,SPP1	15
RENAL AND UROLOGICAL SYSTEM DEVELOPMENT AND FUNCTION	MORPHOLOGY OF URIMARY SYSTEM	4.987	1.03x10-5			ABCA7,BCL2L11,CACNA2D1,CD151,CDKN1A,CFH,CLU,CMIP,DHCR7,FSTL1,GAS6,GRK6,ID2,ITGA11,ITGA3,ITGA6,ITGB1,JAK2,LAMC2,MARK2,MMP14,MTSS1,MXI1,NFAT5,PCCA,PTGIS,SERPINE1,SPP1,SPTBN1,STAT6,TGFB2,TIMP3,XDH,YES1	34
CONNECTIVE TISSUE DISORDERS, INFLAMMATORY DISEASE, INFLAMMATORY RESPONSE, ORGANISMAL INJURY AND ABNORMALITIES, SKELETAL AND MUSCULAR DISORDERS	IMFLAMMATIOM OF JOIMT	4.959	1.10x10-5	Decreased	-2.034	ABCC1,ADAM10,AHI1,ATP1B1,AXL,BCL2L11,C1R,CACNA2D1,CACNB2,CASC3,CCNB1,CCSER2,CD28,CD44,CD81,CDKN1A,CHRM4,CLU,COL4A2,CXCL12,CXCL2,DDR2,DUSP1,EEF1E1,EIF3E,ERRFI1,FASN,FCGRT,FDFT1,FDPS,FKBP1A,FSTL1,FTH1,GALNT1,GSN,GTF3C1,HMGCR,HMMR,HPRT1,HSPA1A/HSPA1B,IFNAR1,IGFBP5,IL33,IL6ST,JAK2,KHSRP,KLF3,LDLR,MAPK3,MFHAS1,MLLT6,MMP11,MMP14,MYCBP2,NBN,NRM,PHTF1,PLA2G2A,PTGIS,PXN,RALA,SAFB,SCN1B,SDC1,SLC1A3,SOCS3,S…	85
HEMATOLOGICAL DISEASE	BLOOD PROTEIM DISORDER	4.959	1.10x10-5		1.342	ANXA4,ATP1B1,BCL2L11,CAVIN2,CCNB1,CCND1,CCND2,CD28,CD44,CDKN1A,CHRNB1,CXCL12,CXCL2,DAP,FASN,FCGRT,FDFT1,FDPS,FKBP1A,FLNA,GALNT1,GSN,GTF2I,HAT1,HELB,IFNAR1,INHBA,ITGA3,KLF3,MVK,MXI1,NEXN,NOTCH2,NUTF2,PRKCA,RALA,SDC1,SMAD6,SMARCA2,SMOC1,SPP1,SRPK2,STAT3,STRN3,TGFB2,TNFRSF11B,TUBA8	47
CELL-TO-CELL SIGNALING AND INTERACTION	RESPOMSE OF AMTIGEM PRESEMTIMG CELLS	4.932	1.17x10-5		1.016	ABCA7,ATP7A,AXL,CD14,CD44,CD47,CNN2,CXCL12,GRK6,GSN,IFNAR1,IL33,IL6ST,ISG15,LGALS3,PRKCA,PXN,RORA,SERPINE1,SOCS3,STAT3,TNFRSF11B,TRAF6,UCP2	24
CELLULAR DEVELOPMENT, CELLULAR GROWTH AND PROLIFERATION	CELL PROLIFERATIOM OF HEPATOMA CELL LIMES	4.932	1.17x10-5		-1.114	ASNS,ATF5,BSG,CCND1,CCNL2,CD44,CD81,CDKN1A,CSNK1G3,CXCL12,ELK1,FHL2,HMGCR,IL6ST,INHBA,KLF6,PCLAF,PRKCA,RNF111,SOCS3,SPP1,STAT3,TNS2,VCAM1	24
ORGANISMAL INJURY AND ABNORMALITIES	EDEMA	4.932	1.17x10-5		-1.151	ADNP,ATP2A2,C1R,C1S,CA5B,CCND1,CCND2,CD14,CD151,CHRM4,CXADR,DUSP1,ECE1,ERF,FCGRT,FKBP1A,FLNA,IL33,JAK2,LBR,LDLR,NEB,NFAT5,NOTCH2,PAM,PIEZO1,RAD23B,RASA3,SC5D,SERPINE1,SLC12A2,SOD3,SOX4,STAT6,TIMP3,TNFRSF11B,ZEB1	37
CANCER, HEMATOLOGICAL DISEASE, ORGANISMAL INJURY AND ABNORMALITIES	LYMPHOID CAMCER	4.924	1.19x10-5		-0.551	ABCA7,ABCC1,ACOT9,ADAM19,ADAR,AHI1,AKAP12,AKAP2,ALDH1L2,ALPK1,ATP1B1,AXL,BCL2L11,BTG1,C1R,C2CD2,C8orf44-SGK3/SGK3,CACNB2,CAVIN2,CBL,CBLB,CCNB1,CCND1,CCND2,CCPG1,CD14,CD151,CD28,CD44,CD47,CDCP1,CDKN1A,CFL1,CHRM4,CIC,CLU,CMIP,COL4A1,COL4A2,COL4A3BP,CSDE1,CSTF3,CUX1,CXCL12,CXCL2,CYP1B1,CYP51A1,CYR61,DAP,DDR2,DYRK1A,EBF3,EIF3C,EIF4EBP1,EIF4G1,ELF2,ELK1,ETNK1,FDFT1,FDPS,FKBP1A,FKBP8,FLNA,FNDC3B,GAS6,G…	175
ORGANISMAL SURVIVAL	SURVIVAL OF ORGAMISM	4.91	1.23x10-5		-0.171	ABCC1,AGRN,ASAH1,BCL2L11,BLMH,CBY1,CCND1,CCND2,CD14,CD28,CD44,CD47,CDKN1A,CFH,CXCL12,CXCL2,DIXDC1,DUSP1,EIF4EBP1,ETS2,FCGRT,GSN,HIPK2,HSPA1A/HSPA1B,ID2,IFNAR1,IL6ST,INHBA,IRF7,ITGA3,ITGB1,JAK2,KLF3,KLF6,LDLR,MMP14,MYOG,NBN,NEFH,NOTCH2,PBRM1,PCCA,PLA2G2A,PSCA,PTGIS,RALBP1,RBBP6,SERPINE1,SF3B1,SHC1,SLC4A1,SMAD6,SMARCA4,SOCS3,SOX4,SPP1,STAT1,STAT3,STAT6,STXBP5,SYNE1,TRAF6,UCP2,ZC3H12A	64
CANCER, ORGANISMAL INJURY AND ABNORMALITIES	THORACIC MEOPLASM	4.907	1.24x10-5		0.318	ACSS2,ACTN1,ADAM19,AGO1,AGRN,AJUBA,AKAP12,ARHGAP5,ASAH1,ATP1B1,AXL,BCL2L11,CACNA2D1,CBL,CCNB1,CCND1,CD151,CD44,CDKN1A,CFH,CLCN3,CLU,CYP1B1,CYR61,DDR2,DIXDC1,DPYSL3,DUS2,DYSF,EIF2S1,EIF3E,EIF4EBP1,EIF4G1,EPHB4,ERRFI1,ETS2,FASN,FDFT1,FDPS,FKBP1A,FOXO4,FXR1,GPC6,GRK6,GSN,HELB,HIPK2,HMGCR,IFRD1,IL33,IL6ST,INHBA,INPP5A,INSIG1,ITGA3,ITGB1,JAK2,KARS,KDM5A,KLF3,KLF6,KRT7,LPP,MARK2,MBTPS1,MMP11,MMP14,MRVI…	123
CELL-TO-CELL SIGNALING AND INTERACTION	IMTERACTIOM OF PROSTATE CAMCER CELL LIMES	4.903	1.25x10-5		-0.119	AKAP12,CD44,CD82,CXCL12,FASN,GRK6,ITGA3,ITGA6,ITGB1,LGALS3	10
CANCER, HEMATOLOGICAL DISEASE, IMMUNOLOGICAL DISEASE, ORGANISMAL INJURY AND ABNORMALITIES	PLASMA CELL DYSCRASIA	4.896	1.27x10-5			ANXA4,ATP1B1,BCL2L11,CAVIN2,CCNB1,CCND1,CCND2,CD28,CD44,CHRNB1,CXCL12,CXCL2,DAP,FASN,FDFT1,FDPS,FKBP1A,FLNA,GSN,GTF2I,HAT1,HELB,IFNAR1,INHBA,ITGA3,KLF3,MXI1,NEXN,NOTCH2,NUTF2,PRKCA,RALA,SDC1,SMAD6,SMARCA2,SMOC1,SPP1,SRPK2,STAT3,STRN3,TGFB2,TNFRSF11B,TUBA8	43
CARDIOVASCULAR SYSTEM DEVELOPMENT AND FUNCTION, TISSUE DEVELOPMENT	DEVELOPMEMT OF CARDIOVASCULAR TISSUE	4.889	1.29x10-5		-0.933	AXL,C1GALT1C1,CBL,CD151,CD44,CDKN1A,COL4A1,COL4A2,CXCL12,CXCL2,CYR61,DAAM1,DAB2,EPHB4,GAS6,HIPK2,INHBA,ITGB1,LGALS3,MMP14,NR2F2,NRP2,PDCL3,PRKCA,PRKX,RASA3,SERPINA3,SERPINE1,SERPINF1,SPP1,SPRY4,STAT1,STAT3,TFAP2A,TGFB2,VCAM1,XDH	37
CANCER, NEUROLOGICAL DISEASE, ORGANISMAL INJURY AND ABNORMALITIES	GLIOMA	4.883	1.31x10-5		-0.152	ACOT9,ACTN1,AGAP3,AJUBA,AKAP12,AKAP2,ALPK1,AOX1,ARHGAP5,ATF5,ATP1B1,ATP2A2,CBL,CCND1,CCND2,CD44,CDKN1A,CHERP,CIC,CLU,COL4A1,COL4A2,CSRP2,CXCL12,DBNDD1,DDR2,DIXDC1,ELK1,EPDR1,FAM111A,FKBP1A,FLNA,GBF1,GSN,H2AFZ,HIPK2,ID2,ID3,IFITM3,IFNAR1,IGFBP5,INPP5A,JAG1,KLF3,KLF6,LDLR,MAG,MAPK8IP2,MMP14,MXI1,MYCBP2,MYRF,NEFH,NF2,NRP2,NUP35,PBRM1,PCLAF,PIEZO1,RAB11FIP5,RBBP6,RC3H2,S100A4,SERPINE1,SF3B1,SIGLEC10,…	83
CANCER, ORGANISMAL INJURY AND ABNORMALITIES, RESPIRATORY DISEASE	LUMG CAMCER	4.848	1.42x10-5		0.56	ACTN1,ADAM19,AGO1,AGRN,AJUBA,AKAP12,ARHGAP5,ASAH1,ATP1B1,AXL,BCL2L11,CACNA2D1,CBL,CCNB1,CCND1,CD151,CD44,CDKN1A,CFH,CLCN3,CLU,CYP1B1,CYR61,DDR2,DIXDC1,DPYSL3,DUS2,DYSF,EIF3E,EIF4G1,EPHB4,ERRFI1,ETS2,FASN,FDFT1,FDPS,FKBP1A,FXR1,GPC6,GRK6,GSN,HELB,HIPK2,HMGCR,IFRD1,IL33,IL6ST,INHBA,INPP5A,INSIG1,ITGA3,ITGB1,JAK2,KARS,KDM5A,KLF3,KLF6,KRT7,LPP,MARK2,MBTPS1,MMP11,MMP14,MRVI1,MXI1,NBN,NCDN,NEB,NF2,NID1…	117
CELLULAR MOVEMENT	MIGRATIOM OF MYELOID CELLS	4.845	1.43x10-5		-0.528	ADAM10,CCND1,CD44,CD47,CFH,CNN2,COL4A1,CXCL12,CXCL2,DDR2,IL33,IL6ST,ITGA6,ITGB1,LDLR,MMP14,RTN4,SERPINE1,SPP1,STAT6,TIMP3,VCAM1	22
CELL-TO-CELL SIGNALING AND INTERACTION, CONNECTIVE TISSUE DEVELOPMENT AND FUNCTION	ADHESIOM OF FIBROBLAST CELL LIMES	4.842	1.44x10-5	Increased	2.126	ADNP,AKAP12,CBL,CD28,CD44,CYR61,ITGA11,ITGB1,JAG1,NF2,RASA1,SPP1	12
DEVELOPMENTAL DISORDER	MIDLIME DEFECT	4.833	1.47x10-5		-0.34	CDKN1A,CFL1,CYP51A1,DHCR7,ECE1,EPHB4,FKBP1A,FKBP8,FLNA,GJA5,HIPK2,INSIG1,INSIG2,JAG1,MED13L,MMP14,PHGDH,PLXNB2,PRRX1,RAD23B,RALA,RERE,SC5D,SMARCA4,SNX2,SOX4,TFAP2A,TGFB2,TRAF6	29
ORGANISMAL DEVELOPMENT	SIZE OF BODY	4.833	1.47x10-5		1.008	AHI1,ARHGAP5,ATP2A2,BCL2L11,BLMH,BSG,CA5B,CBY1,CCND1,CD81,CDKN1A,CHRM4,CLCN3,DDR2,DUSP1,DYRK1A,EIF4EBP1,FKBP8,HAT1,Hist1h1e,ID2,IFRD1,IGFBP5,IL6ST,INPPL1,INSIG1,IRS2,ITGA11,ITPA,KDM5A,KLF6,LRRK1,MAPK8IP2,MARK2,MMP14,MYLPF,NBN,Nes,NFIC,NR2F2,PAIP2,RAB3D,RAD23B,SAFB,SBNO2,Scd2,SERPINE1,SLC12A2,SLC4A1,SLC4A2,SLC6A8,SNX2,SOCS7,SPP1,SPRY4,SPTBN1,STAT1,STAT3,STAT6,SV2B,SYNE1,TFAP2A,TGFB2,TGFBI,TIMP3,TN…	72
CARDIOVASCULAR SYSTEM DEVELOPMENT AND FUNCTION, CELL-TO-CELL SIGNALING AND INTERACTION	ADHESIOM OF EMDOTHELIAL CELLS	4.83	1.48x10-5	Increased	2.444	ADAM10,AXL,CD151,CD44,CXCL12,CXCL2,CYR61,GAS6,ITGA6,ITGB1,LGALS3,PRKCA,SHC1,SLC4A1,SPP1,STAT1,STAT6,TGFBI,VCAM1	19
ORGANISMAL INJURY AND ABNORMALITIES	FIBROSIS	4.83	1.48x10-5		-0.849	AGO1,ATP2A2,BLMH,CBL,CCND1,CD151,CD28,CD44,CLU,CTNNA1,CXCL12,DAG1,DDR2,DYSF,ELK1,FKBP1A,FSTL1,GSN,HPRT1,IFNAR1,IL33,IL6ST,INHBA,ITGB1,JAK2,LDLR,LGALS3,MMP14,MTSS1,NEXN,PLA2G2A,PTGIS,RERE,RORA,S100A4,SCD,SERPINB1,SERPINE1,SF3B1,SLC18A3,SLC4A1,SMARCA4,SOCS3,SPP1,STAT1,STAT3,TGFB2,TIMP3,TNFRSF11B,TRAF6,TUBA8,XDH	52
CANCER, ORGANISMAL INJURY AND ABNORMALITIES	HEAD AMD MECK MEOPLASIA	4.804	1.57x10-5		-1.089	ABCA7,ABCC1,ACSS2,ADAM10,ADAM19,AGAP3,AHI1,AJUBA,AKAP12,AKAP2,AKR1C3,ALPK1,ANKRD17,ANKRD52,AOX1,AP1B1,ARHGAP5,ATP1B1,ATP2A2,ATP7A,AXL,BCL2L11,BSG,C1QTNF2,C2CD2,CASC3,CBL,CCND1,CCND2,CCNL2,CD44,CDC42EP1,CDKN1A,CHERP,CHRM4,CHRNB1,CIC,CLASP1,CLCN3,CLU,CNN2,COL4A1,COL4A2,COL4A3BP,CSNK2A2,CSTF3,CTDNEP1,CXCL12,CXCL2,CYP1B1,CYP51A1,CYR61,DAAM1,DAB2,DBNDD1,DDR2,DDX24,DDX6,DHCR7,DIXDC1,DTD2,DUSP1,DUT,DYRK…	213
CANCER, NEUROLOGICAL DISEASE, ORGANISMAL INJURY AND ABNORMALITIES	ASTROCYTOMA	4.799	1.59x10-5			ACOT9,ACTN1,AGAP3,AJUBA,AKAP12,ALPK1,AOX1,ARHGAP5,ATP1B1,ATP2A2,CBL,CCND2,CD44,CDKN1A,CHERP,CIC,CLU,COL4A1,COL4A2,CSRP2,CXCL12,DBNDD1,DDR2,DIXDC1,ELK1,EPDR1,FAM111A,FKBP1A,FLNA,GBF1,GSN,HIPK2,ID2,ID3,IFITM3,IFNAR1,IGFBP5,INPP5A,JAG1,KLF3,KLF6,LDLR,MAG,MAPK8IP2,MMP14,MXI1,MYCBP2,MYRF,NEFH,NRP2,PBRM1,PCLAF,PIEZO1,RAB11FIP5,RBBP6,RC3H2,S100A4,SERPINE1,SF3B1,SIGLEC10,SLC12A2,SMC1A,SOX9,SPP1,STAT3,SV2…	75
CELL DEATH AND SURVIVAL	CELL DEATH OF BLOOD CELLS	4.799	1.59x10-5		0.06	ABCC1,AGRN,ASAH1,ATG3,BCL2L11,BTG1,CBL,CCNB1,CCND2,CD14,CD28,CD44,CD47,CD81,Cdc42,CDKN1A,CLU,CSNK2A2,CXCL12,CXCL2,EIF4EBP1,ETS2,FKBP8,FTH1,GSN,HIPK2,ID2,ID3,IFNAR1,IL33,IL6ST,INHBA,IRS2,ISG15,ITGB1,JAK2,LDLR,LGALS3,MAPK3,MXD3,NBN,NFAT5,PCLAF,PRKCA,PXN,RASA1,SERPINA3,SERPINF1,SF3B1,SHC1,SMAD6,SMARCA4,SOX4,SPP1,STAT1,STAT3,STAT6,TGFB2,TNFRSF11B,TPR	60
INFLAMMATORY RESPONSE	IMMUME RESPOMSE OF CELLS	4.799	1.59x10-5		1.921	ABCA7,ATG3,AXL,BCL2L11,CBL,CD14,CD28,CD44,CD47,CDKN1A,CFH,CLCN3,CNN2,CYP1B1,DYSF,EIF4EBP1,EIF4EBP2,ETS2,FSTL1,GAS6,GOLGA4,GRK6,GSN,IFNAR1,IL33,IL6ST,IRF7,ISG15,ITGB1,LGALS3,PIP5K1A,PRKCA,PRKX,PSCA,PXN,RAB31,RALA,RALBP1,RORA,SERPINE1,SGK1,SOCS3,SPRY4,STAT1,STAT3,STEAP2,TM9SF4,TNFRSF11B,TRAF6,TRIM25,UCP2,VCAM1	52
DERMATOLOGICAL DISEASES AND CONDITIONS, ORGANISMAL INJURY AND ABNORMALITIES	PSORIASIS	4.775	1.68x10-5			ABCC1,ADAM10,ADAR,APOD,ATP1B1,ATP2A2,CCND1,CCND2,CD47,CFL1,CYP1B1,DBN1,DUSP1,EIF2S1,EIF4EBP1,FADS1,FASN,FKBP1A,FSCN1,GAPVD1,GSN,H2AFZ,HMGCR,IFNAR1,IL17RE,IL33,IRF7,ISG15,ITGA3,ITGA6,JAK2,LDLR,LGALS3,MMP14,NRP2,PCLAF,PEX19,PGD,PRKCA,SERPINB1,SERPINE1,SGK1,SHC1,SOCS3,SPC25,SQLE,STAT1,SUB1,TIMP3,TROVE2,VCAM1	51
GENE EXPRESSION	TRAMSACTIVATIOM OF RMA	4.775	1.68x10-5		0.411	ADAR,AHRR,ANXA4,CBL,CBY1,CCND1,CCND2,CD28,CD44,DAB2,ELK1,ETS2,FHL2,FOXO4,GAS6,GTF2I,ID3,IGFBP5,IL33,INHBA,IRF7,KLF6,MAPK3,MED6,MYCBP2,MYOG,NEK9,NFIB,NFIC,NOTCH2,NSD3,PXN,RORA,S100A4,SMAD6,SMARCA2,SMARCA4,SOCS3,STAT1,STAT3,STAT6,SUB1,TBL1X,TFAP2A,TGFB1I1,TRAF6,UBTF,UCP2,XDH	49
CELLULAR DEVELOPMENT, CELLULAR GROWTH AND PROLIFERATION, CONNECTIVE TISSUE DEVELOPMENT AND FUNCTION	PROLIFERATIOM OF FIBROBLAST CELL LIMES	4.767	1.71x10-5		-1.251	AKAP12,ATG3,BTG1,CBL,CCND1,CD81,CDKN1A,CIRBP,CXCL12,EBNA1BP2,EIF3C,EIF3E,ERRFI1,FOXO4,GAK,HIPK2,HSPA1A/HSPA1B,ITGA11,ITGB1,JAG1,KLF6,MAPK3,MLLT6,MMP14,NF2,PCLAF,PRKCA,RALA,SERPINE1,SLC3A2,SMARCA2,SOX9,STAT1,STAT3,STEAP2,SUV39H1,TAF6,TPR,TSN,UBTF,WISP1	41
CELLULAR MOVEMENT	IMVASIOM OF LUMG CAMCER CELL LIMES	4.764	1.72x10-5		1.602	ADAM10,AXL,CD44,CD82,CFH,CXCL12,DUSP1,FSCN1,ITGB1,KDM5A,RALA,S100A4,SPP1,STAT3,TGFB2,WISP1	16
CANCER, GASTROINTESTINAL DISEASE, HEPATIC SYSTEM DISEASE, ORGANISMAL INJURY AND ABNORMALITIES	HEPATOCELLULAR CARCIMOMA	4.762	1.73x10-5		-0.526	ACSS2,ADAR,ARHGAP44,ATP1B1,ATP1B3,AXL,BCL2L11,BSG,C1QTNF2,C3orf70,CACNA2D1,CCNB1,CCND1,CD44,CD82,CDKN1A,CHST2,COL4A2,CXCL12,CXCL2,CYP39A1,DDR2,FADS1,FKBP1A,FOXQ1,HELB,HMGCR,IFITM3,IFNAR1,IL6ST,INPP5A,ITGB1,JAG1,KLF3,KLF6,KRT7,LGALS3,MMP14,NEB,OGDH,PDK4,PRPF40A,RALA,RORA,RTN4,S100A4,SCD,Scd2,SERPINE1,SF3B1,SLC4A1,SOCS3,SORT1,SOX4,SOX9,SPP1,SPTBN1,SQLE,STAT3,SYNE1,TMEFF1,TMX2,TTN,UBE2T,WISP2	65
CANCER, GASTROINTESTINAL DISEASE, ORGANISMAL INJURY AND ABNORMALITIES	UPPER GASTROIMTESTIMAL TRACT CAMCER	4.762	1.73x10-5			ABCA7,ABCC1,ACOT9,ADAM10,ADNP,AGRN,AHRR,AKAP2,AOX1,ATF5,ATP7A,AXL,BSG,C11orf54,CASC3,CBLB,CCND1,CCND2,CCPG1,CD44,CDKN1A,CFH,CLU,COL4A1,COL6A3,COX4I1,CTNNA1,CUX1,CXCL12,CXCL2,CYR61,DAAM1,DAB2,DAG1,DHX57,DPYSL3,DUSP1,DYSF,ERF,ERRFI1,ETFB,FAM111A,FAM53C,FASN,FKBP10,FKBP1A,FLNA,FNBP4,FNDC3B,FTH1,FXR1,FYCO1,GAS6,GATAD2A,GEMIN8,GPC6,GSE1,GTF3C1,HELB,HMGCR,HMMR,IGFBP5,INHBA,INPPL1,INSIG2,ITGA11,ITGA3,IT…	148
MOLECULAR TRANSPORT	EXPORT OF MOLECULE	4.762	1.73x10-5	Increased	2.262	ABCA7,ABCC1,ALKBH5,ATP7A,BSG,CD14,CHRM4,CLCN3,CLU,CXCL12,CYP7A1,FTH1,HEPH,IL33,JAK2,LDLR,LSS,NUDT4,NUTF2,PLA1A,RAE1,RALBP1,SCD,Scd2,SGK1,SLC12A2,SLC4A1,SLC7A5,STAT3,TPR	30
CELL-TO-CELL SIGNALING AND INTERACTION, CELLULAR FUNCTION AND MAINTENANCE, INFLAMMATORY RESPONSE	PHAGOCYTOSIS OF CELLS	4.74	1.82x10-5		1.31	ABCA7,ATG3,AXL,CBL,CD14,CD44,CD47,CFH,CLCN3,CNN2,ETS2,GAS6,GRK6,GSN,IFNAR1,IL33,IRF7,ISG15,ITGB1,LGALS3,PIP5K1A,PRKCA,PRKX,PXN,RAB31,RALA,RORA,SERPINE1,TM9SF4,UCP2	30
CELLULAR MOVEMENT	CELL MOVEMEMT OF COMMECTIVE TISSUE CELLS	4.74	1.82x10-5		-0.289	ACTR3,CBL,CCND1,CD44,CDKN1A,CXCL12,CYR61,DDR2,FNDC3B,GSN,HMMR,IL33,ITGB1,LPP,MAPK3,MMP14,PIP5K1A,PXN,RND3,SERPINF1,SLC4A2,SPP1,STAT3,TGFB1I1,TNN,ZYX	26
AMINO ACID METABOLISM, POST-TRANSLATIONAL MODIFICATION, SMALL MOLECULE BIOCHEMISTRY	PHOSPHORYLATIOM OF L-AMIMO ACID	4.738	1.83x10-5		0.941	ADNP,AGRN,C8orf44-SGK3/SGK3,CD44,CD81,DDR2,DUSP1,DYRK1A,HIPK2,IFNAR1,ITGB1,JAK2,LRRK1,MAPK3,MARK2,PDCL3,PRKCA,PXN,RASA1,SGK1,TTK,ULK1,YES1	23
CARDIOVASCULAR DISEASE, ORGANISMAL INJURY AND ABNORMALITIES	PERIPHERAL ARTERIAL DISEASE	4.733	1.85x10-5			ADAR,CFH,CHMP2B,CXCL12,DAB2,EBNA1BP2,FTH1,HEBP2,HMGCR,HSPA1A/HSPA1B,HSPA4,IGFBP5,NR2F2,PDLIM5,RAB33B,RFK,SERPINA3,SGK1,SPP1,SUB1,TGFB2,TTLL7,TUBA8,UBE2H,UCP2	25
CELLULAR GROWTH AND PROLIFERATION	ARREST IM PROLIFERATIOM OF CELLS	4.733	1.85x10-5			AKAP12,CCND1,CDKN1A,DAB2,FASN,GTF2I,HIPK2,ID3,IL6ST,INHBA,JAK2,MAPK3,NOTCH2,PIK3R3,SERPINE1,SLC7A5,SMAD6,SMARCA4,SOCS3,STAT1,STAT3,TGFB2,TRAF6,USP7	24
CARDIOVASCULAR DISEASE	HYPERTEMSIOM	4.724	1.89x10-5			ABHD4,ACBD3,ADGRL1,ATP2A2,BAZ1A,BNIP2,C1S,CA5B,CACNA2D1,CACNB2,CFH,CHRM4,CHRNB1,CMTM7,CREB5,CSNK2A2,DCAF8,DDR2,DPYSL3,ECE1,FAXDC2,FKBP1A,FKBP2,FNDC3B,GSN,GYPC,HMGCR,IL6ST,IRS2,ITGA11,KIAA0040,LDLR,MAP6,MSMO1,NSD3,NUCB2,OLFML2B,PLA2G2A,PLEKHA5,PMEPA1,PRELID2,PRRX1,PTGIS,RORA,SCN1B,SERPINE1,SHC1,SHC2,SLC12A2,TGFB1I1,TMEM97,TNNC2,TPR,TRAM1,TTK,VCAM1,VEPH1,WISP2	58
HEMATOLOGICAL DISEASE, ORGANISMAL INJURY AND ABNORMALITIES	THROMBOCYTOSIS	4.721	1.90x10-5		-1.387	ATP1B1,BCL2L11,CBL,CUX1,DAAM1,IFNAR1,IL33,IL6ST,JAK2,LGALS3,SF3B1,ZC3H12A	12
CANCER, GASTROINTESTINAL DISEASE, ORGANISMAL INJURY AND ABNORMALITIES	COLOM CARCIMOMA	4.717	1.92x10-5			ABHD4,ACBD3,ACOT9,ADAM19,ADAR,ADNP,AGAP3,AGPAT5,AGRN,AHI1,AHRR,AKAP12,AKAP2,ALDH1L2,ANK1,ANKHD1/ANKHD1-EIF4EBP3,ANKRD52,ANXA4,AP1S1,ARHGAP11A,ARHGAP44,ARHGAP5,ART3,ASAH1,ATG16L1,ATG3,ATP7A,AXL,BCL2L11,C11orf54,C14orf1,C1QTNF2,C1R,C2CD2,C6orf89,C8orf44-SGK3/SGK3,CACNA2D1,CACUL1,CBX6,CBY1,CCSER2,CD44,CD82,CDC42EP1,CDCP1,CFH,CHST2,CIC,CIRBP,CLCN3,CLU,CMIP,COL4A2,COL6A3,CYP1B1,DAB2,DAG1,DDR2,DDX6,DEP…	272
CELL MORPHOLOGY, ORGANISMAL INJURY AND ABNORMALITIES, TISSUE MORPHOLOGY	ABMORMAL MORPHOLOGY OF BASEMEMT MEMBRAME	4.706	1.97x10-5			BCL2L11,CD151,CFH,ITGA3,ITGA6,MMP14,NID1,TGFB2	8
CELLULAR DEVELOPMENT, NERVOUS SYSTEM DEVELOPMENT AND FUNCTION, TISSUE DEVELOPMENT	DIFFEREMTIATIOM OF MEUROMS	4.701	1.99x10-5		0.371	ACTR3,AGRN,ASAH1,ATF5,BNIP2,CFL1,CXCL12,DDX6,DIXDC1,EBF3,EIF4G1,FKBP8,GSN,HIPK2,HSPA1A/HSPA1B,ID2,ID3,INHBA,ITGB1,JAG1,MAG,NBN,NEFH,Nes,PHGDH,PLXNB2,PPM1L,PRKCA,RTN4,S100A4,SERPINF1,SHC1,SLC1A3,SOX4,STAT3,TFAP2A,TGFB2,TRAPPC9,ULK1,ZEB1	40
EMBRYONIC DEVELOPMENT, HAIR AND SKIN DEVELOPMENT AND FUNCTION, ORGAN DEVELOPMENT, ORGAN MORPHOLOGY, ORGANISMAL DEVELOPMENT, TISSUE DEVELOPMENT	MORPHOGEMESIS OF EPIDERMIS	4.701	2.01x10-5			ATP7A,C8orf44-SGK3/SGK3,Cdc42,FOXQ1,IGFBP5,INHBA,SMARCA4,TFAP2A,TGFB2	9
CELL MORPHOLOGY, TISSUE MORPHOLOGY	MORPHOLOGY OF BASEMEMT MEMBRAME	4.697	2.01x10-5			BCL2L11,CD151,CFH,ITGA3,ITGA6,MMP14,MTSS1,NID1,TGFB2	9
CELL CYCLE	ARREST IM CELL CYCLE PROGRESSIOM	4.695	2.02x10-5			C8orf44-SGK3/SGK3,CCND1,CCND2,CD28,CD44,CDKN1A,CLU,ERRFI1,FASN,FHL2,FKBP1A,FOXO4,GAS6,HIPK2,HYPK,ID2,INHBA,IRF7,KLF6,LGALS3,MAPK3,MYOG,NBN,NOTCH2,PRKCA,S100A4,SMARCA2,SMARCA4,STAT1,STAT3,TCP1,TGFB2,WDR6,ZEB1	34
CELL MORPHOLOGY, TISSUE MORPHOLOGY	MORPHOLOGY OF COMMECTIVE TISSUE CELLS	4.688	2.05x10-5			ATP6V0C,CBL,CBY1,CCND1,CD44,CDKN1A,CREB5,DUSP1,IFNAR1,IFRD1,IL6ST,INSIG1,ITGB1,KNSTRN,LDLR,MBTPS1,MMP14,PDK4,PRRX1,PRRX2,RAD23B,SBNO2,SERPINE1,SLC12A2,SLC4A2,SMAD6,SOX9,TGFB1I1,TGFB2,TNFRSF11B,TPR,TRAF6	32
CELL CYCLE	IMTERPHASE OF TUMOR CELL LIMES	4.684	2.07x10-5		-0.234	ARHGAP11A,ATF5,AXL,CCNB1,CCND1,CCND2,CDKN1A,CSNK2A2,CYP1B1,CYR61,DAB2,DUSP1,EIF3E,FASN,ID3,IGFBP5,ITGA6,ITGB1,JAK2,LGALS3,MAPK3,MXD3,MXI1,NOTCH2,PCLAF,PHF8,PLAC1,PMEPA1,SGK1,SHC1,SOX9,SPP1,SRPK2,STAT1,STAT3,STK38L,TAF6,TCP1	38
ENDOCRINE SYSTEM DISORDERS, GASTROINTESTINAL DISEASE, METABOLIC DISEASE, ORGANISMAL INJURY AND ABNORMALITIES, RENAL AND UROLOGICAL DISEASE	DIABETIC MEPHROPATHY	4.682	2.08x10-5			AKR1C3,APOD,CA5B,CACNA2D1,CACNB2,CCND1,CDKN1A,CLU,CXADR,DPYSL3,FASN,FKBP1A,GAS6,HMGCR,LDLR,LGALS3,PTGIS,SCD,SPP1,STAT1,XDH	21
ORGANISMAL INJURY AND ABNORMALITIES, RENAL AND UROLOGICAL DISEASE	URIMATIOM DISORDER	4.678	2.10x10-5		-0.408	ABCC1,CACNA2D1,CACNB2,CD151,CDKN1A,CFH,CHRM4,CLU,CMIP,ETFB,GAS6,HMGCR,ID2,IFNAR1,IRS2,MARK2,MLYCD,MTSS1,NFAT5,OGDH,PCCA,PLA2G2A,SERPINE1,SGK1,SLC4A1,SMTN,SPP1,STAT1,TGFB2,XDH,YES1	31
CELLULAR DEVELOPMENT, CONNECTIVE TISSUE DEVELOPMENT AND FUNCTION, TISSUE DEVELOPMENT	DIFFEREMTIATIOM OF BOME CELLS	4.674	2.12x10-5		-0.713	ADAR,ATP2A2,CBL,CD47,CYR61,DDR2,EPHB4,FASN,FHL2,FNDC3B,GSN,ID2,ID3,IGFBP5,IL33,IL6ST,INHBA,ITGA11,JAG1,MAPK3,MMP14,NBR1,NOTCH2,PDK4,PRRX2,Ptprv,SBNO2,SERPINF1,SMAD6,SMOC1,SOCS3,SPP1,STAT1,STAT6,TGFB2,TNFRSF11B,TNN,TRAF6,WISP1	39
TISSUE DEVELOPMENT	ORGAMIZATIOM OF EXTRACELLULAR MATRIX	4.67	2.14x10-5			ATP7A,CYR61,DDR2,HSD17B12,LGALS3,MMP11,NID1,OLFML2B,PXDN,SMARCA4,SMOC1,SOX9,TGFB2,TGFBI,TNFRSF11B	15
INFECTIOUS DISEASES	REPLICATIOM OF HEPATITIS C VIRUS	4.666	2.16x10-5		-0.495	ADAR,AGO1,DDX6,FASN,HMGCR,IFITM3,IFNAR1,ISG15,RAB33B,SOCS3,SRPK2,ZC3H12A	12
CARDIOVASCULAR SYSTEM DEVELOPMENT AND FUNCTION	VASCULARIZATIOM	4.664	2.17x10-5		-0.258	AXL,CBL,CD28,CD44,CD47,CD82,CXCL12,CYR61,ERRFI1,GAS6,HMMR,ID3,IFNAR1,IGFBP5,INHBA,LGALS3,MMP14,NRP2,RORA,S100A4,SERPINE1,SERPINF1,SOCS3,SPP1,STAT3,VCAM1	26
CARDIOVASCULAR SYSTEM DEVELOPMENT AND FUNCTION	MORPHOLOGY OF VASCULATURE	4.66	2.19x10-5			ANKRD17,AXL,C1GALT1C1,CD151,CFH,CLU,CXADR,CXCL12,ECE1,ERRFI1,FLNA,FXR1,HSD17B7,ID3,IL6ST,ITGA3,LDLR,MARK2,MMP14,NID1,NR2F2,PAM,PRRX1,PRRX2,PTGIS,PXN,RASA1,SERPINE1,SHC1,SOX4,SPP1,TCF7L1,TFAP2A,TGFB2,TIMP3,TNFRSF11B,UCHL3	37
CELL DEATH AND SURVIVAL	CELL DEATH OF CERVICAL CAMCER CELL LIMES	4.66	3.42x10-5		0.669	AKIP1,ATP2A2,BAZ1A,BCL2L11,BNIP2,CCNB1,CCND1,CCND2,CDKN1A,CLASP1,CSNK2A2,FKBP8,FOXO4,FTH1,GRINA,HSPA1A/HSPA1B,HSPB11,HYPK,PTPMT1,RASA1,RFK,SGK1,SHC1,SPC25,SPP1,STAT1,STAT3,TAF6,TCERG1,TCP1,TFAP2A,TIMP3,TRAF6,TTK,UCP2,UXT	36
CELLULAR ASSEMBLY AND ORGANIZATION, CELLULAR FUNCTION AND MAINTENANCE	ORGAMIZATIOM OF ACTIM CYTOSKELETOM	4.658	2.20x10-5	Increased	2.236	ACTN1,AKAP12,AKAP2,ARHGAP44,AXL,CD47,CD82,Cdc42,CFL1,CLU,CXADR,CXCL12,DBN1,DIXDC1,FLNA,FSCN1,GAS6,GSN,INPPL1,ITGB1,MTSS1,NF2,PAM,PIP5K1A,PLEK2,RALA,RND3,SHC1,SLC3A2,TGFB2,Wasl	31
CELL-TO-CELL SIGNALING AND INTERACTION, CELLULAR FUNCTION AND MAINTENANCE, INFLAMMATORY RESPONSE	PHAGOCYTOSIS OF PHAGOCYTES	4.654	2.22x10-5		0.717	ABCA7,AXL,CD14,CD44,CD47,CFH,CLCN3,CNN2,GRK6,GSN,IFNAR1,IL33,ISG15,LGALS3,PRKCA,PXN,RORA,SERPINE1,UCP2	19
CANCER, DERMATOLOGICAL DISEASES AND CONDITIONS, ORGANISMAL INJURY AND ABNORMALITIES	POROKERATOSIS	4.648	2.25x10-5			FDPS,MVD,MVK,PMVK	4
ORGANISMAL INJURY AND ABNORMALITIES, RESPIRATORY DISEASE, RESPIRATORY SYSTEM DEVELOPMENT AND FUNCTION, TISSUE MORPHOLOGY	ABMORMAL MORPHOLOGY OF RESPIRATORY EPITHELIUM	4.648	2.25x10-5			CBY1,ERRFI1,MMP14,STAT6	4
CELLULAR DEVELOPMENT, CONNECTIVE TISSUE DEVELOPMENT AND FUNCTION, TISSUE DEVELOPMENT	DIFFEREMTIATIOM OF OSTEOBLASTIC-LIMEAGE CELLS	4.646	2.26x10-5		-1.319	ADAR,CBL,CYR61,DDR2,FASN,FHL2,FNDC3B,ID2,ID3,IGFBP5,IL6ST,INHBA,ITGA11,JAG1,MAPK3,MMP14,NBR1,PRRX2,Ptprv,SBNO2,SERPINF1,SMAD6,SMOC1,SPP1,STAT1,TGFB2,TNN,TRAF6,WISP1	29
CELL DEATH AND SURVIVAL	CELL DEATH OF CARCIMOMA CELL LIMES	4.638	2.30x10-5		-1.67	ABCC1,AXL,BCL2L11,CCND1,CCND2,CD44,CD82,CDCP1,CFH,CLU,COL4A1,COL4A2,CXCL12,DUSP1,EIF2S1,ETS2,FASN,ID3,IL6ST,JAG1,KLF6,NFIB,PDCD4,PMEPA1,S100A4,SCD,SERPINA3,SLC18A3,SPP1,SRPK2,STAT1,STAT3,ZEB1	33
CARDIOVASCULAR SYSTEM DEVELOPMENT AND FUNCTION, TISSUE DEVELOPMENT	DEVELOPMEMT OF EMDOTHELIAL TISSUE	4.636	2.31x10-5		-1.107	AXL,C1GALT1C1,CBL,CD151,CD44,CDKN1A,COL4A1,COL4A2,CXCL12,CXCL2,CYR61,DAAM1,DAB2,EPHB4,GAS6,HIPK2,INHBA,ITGB1,LGALS3,MMP14,NR2F2,NRP2,PDCL3,PRKCA,PRKX,RASA3,SERPINA3,SERPINE1,SERPINF1,SPP1,SPRY4,STAT1,TFAP2A,TGFB2,VCAM1,XDH	36
HEREDITARY DISORDER, ORGANISMAL INJURY AND ABNORMALITIES, SKELETAL AND MUSCULAR DISORDERS	AUTOSOMAL DOMIMAMT MYOPATHY	4.627	2.36x10-5			CFL1,COL4A1,COL4A2,COL6A3,CSRP2,DAB2,DYSF,JAG1,MARS,NEFH,SDCBP,SYNE1,TGFBI,TMEM43	14
CELL-TO-CELL SIGNALING AND INTERACTION, CELLULAR MOVEMENT	RECRUITMEMT OF MYELOID CELLS	4.623	2.38x10-5	Increased	2.083	ADAM10,ATG16L1,CD14,CD28,CD44,CD47,Cdc42,CNN2,CXCL12,CXCL2,CYP1B1,CYR61,GRK6,GSN,HSPA1A/HSPA1B,IFNAR1,IL33,IRF7,LGALS3,NFIC,RTN4,S100A4,SERPINE1,SPP1,STAT3,STAT6,UCP2,VCAM1,XDH	29
LIPID METABOLISM, SMALL MOLECULE BIOCHEMISTRY, VITAMIN AND MINERAL METABOLISM	SYMTHESIS OF TERPEMOID	4.623	2.38x10-5		-0.406	ACBD3,AKR1C3,CYP1B1,CYP39A1,CYP51A1,CYP7A1,DAB2,DHCR7,FDFT1,FDPS,FDX1,FOXO4,HMGCR,HSD17B7,IDI1,INHBA,INSIG1,INSIG2,ITGA6,JAK2,LDLR,LSS,MBTPS1,MVD,MVK,NR2F2,PMVK,SCD,SERPINE2	29
CELL DEATH AND SURVIVAL	APOPTOSIS OF HEPATOMA CELL LIMES	4.62	2.40x10-5		-0.127	BCL2L11,CCND1,CCNL2,CDKN1A,CLU,CXCL12,FKBP8,FOXO4,INHBA,PMEPA1,SCD,SERPINF1,SOD3,SOX4,STAT1,STAT3,STAT6,TNS2,ULK1	19
CONNECTIVE TISSUE DEVELOPMENT AND FUNCTION, SKELETAL AND MUSCULAR SYSTEM DEVELOPMENT AND FUNCTION, TISSUE DEVELOPMENT	MORPHOLOGY OF BOME	4.613	2.44x10-5			CCND1,CD14,CD44,CD47,CDKN1A,CYP1B1,CYP51A1,DDR2,ECE1,ERRFI1,FHL2,FKBP8,FSTL1,GSN,HAT1,IFNAR1,IFRD1,IGFBP5,IL6ST,INHBA,ISG15,ITGA11,ITGB1,LDLR,LGALS3,LRRK1,MMP14,MYOG,NBR1,NFIC,NOTCH2,PDK4,PRRX1,PRRX2,S100A4,SBNO2,SC5D,SLC4A2,SMAD6,SOCS7,SOX4,SOX9,SPP1,SPRY4,STAT1,TFAP2A,TGFB2,TM7SF2,TNFRSF11B,TRAF6,WISP1	51
DENTAL DISEASE, DIGESTIVE SYSTEM DEVELOPMENT AND FUNCTION, GASTROINTESTINAL DISEASE, ORGANISMAL DEVELOPMENT, ORGANISMAL INJURY AND ABNORMALITIES	ABMORMAL MORPHOLOGY OF IMCISOR	4.613	2.44x10-5			CCND1,INHBA,ITGA11,MMP14,NFIC,PRRX1,PRRX2,SPRY4,TRAF6	9
CARDIOVASCULAR DISEASE, ORGANISMAL INJURY AND ABNORMALITIES, REPRODUCTIVE SYSTEM DISEASE	PREECLAMPSIA	4.611	2.45x10-5			ABHD4,ACBD3,ADGRL1,ATP2A2,BAZ1A,BNIP2,C1S,CFH,DCAF8,DPYSL3,FAXDC2,FKBP2,FNDC3B,GSN,HMGCR,IL6ST,ITGA11,KIAA0040,LDLR,MAP6,MSMO1,NSD3,NUCB2,OLFML2B,PLA2G2A,PLEKHA5,PMEPA1,PRRX1,PTGIS,SERPINE1,SHC2,TGFB1I1,TMEM97,TNNC2,TPR,TRAM1,TTK,WISP2	38
CARDIOVASCULAR DISEASE, ORGANISMAL INJURY AND ABNORMALITIES	ADVAMCED STAGE PERIPHERAL ARTERIAL DISEASE	4.602	2.50x10-5			ADAR,CFH,CXCL12,DAB2,FTH1,HSPA1A/HSPA1B,HSPA4,IGFBP5,NR2F2,PDLIM5,RAB33B,RFK,SPP1,SUB1,TGFB2,TTLL7,UBE2H,UCP2	18
CELLULAR ASSEMBLY AND ORGANIZATION, CELLULAR FUNCTION AND MAINTENANCE	FORMATIOM OF ACTIM CYTOSKELETOM	4.593	2.55x10-5			AKAP2,FLNA,ITGB1,PAM,SLC4A2,TRAF6,VCAM1	7
CELL-TO-CELL SIGNALING AND INTERACTION, CELLULAR FUNCTION AND MAINTENANCE, HEMATOLOGICAL SYSTEM DEVELOPMENT AND FUNCTION	PHAGOCYTOSIS OF MYELOID CELLS	4.587	2.59x10-5		0.717	ABCA7,AXL,CD14,CD44,CD47,CFH,CLCN3,CNN2,GRK6,GSN,IFNAR1,IL33,ISG15,LGALS3,PRKCA,PXN,RORA,SERPINE1,UCP2	19
CELL DEATH AND SURVIVAL	CELL DEATH OF LUMG CAMCER CELL LIMES	4.577	2.65x10-5	Decreased	-2.068	ABCC1,ATP1B3,AXL,BCL2L11,CCND1,CDCP1,CDKN1A,CFH,COL4A1,COL4A2,DUSP1,EIF2S1,HIPK2,ID3,IL6ST,JAG1,KLF6,LGALS3,NFIB,PMEPA1,PRKCA,S100A4,SERPINA3,SERPINF1,SLC18A3,SPP1,SRPK2,STAT3,ZEB1	29
CANCER, GASTROINTESTINAL DISEASE, ORGANISMAL INJURY AND ABNORMALITIES	ORAL CAVITY CARCIMOMA	4.575	2.66x10-5			ADAM10,CD44,CXCL12,CXCL2,DAAM1,FASN,GAS6,GPC6,IGFBP5,INHBA,ITGA11,ITGA6,KRT7,MMP11,MTSS1,PDLIM5,PLA2G2A,RIN2,RND3,SERPINE1,SMAD6,SOD3,TIMP3,TRAM1,TUBA8	25
CONNECTIVE TISSUE DISORDERS, IMMUNOLOGICAL DISEASE, INFLAMMATORY DISEASE, INFLAMMATORY RESPONSE, ORGANISMAL INJURY AND ABNORMALITIES, SKELETAL AND MUSCULAR DISORDERS	RHEUMATOID ARTHRITIS	4.564	2.73x10-5			ADAM10,AHI1,ATP1B1,C1R,CACNA2D1,CACNB2,CASC3,CCNB1,CCSER2,CD28,CD44,CHRM4,CLU,COL4A2,CXCL12,CXCL2,DUSP1,EEF1E1,EIF3E,FCGRT,FDPS,FKBP1A,FTH1,GALNT1,GSN,GTF3C1,HMGCR,HPRT1,HSPA1A/HSPA1B,IFNAR1,IGFBP5,IL33,IL6ST,JAK2,KHSRP,KLF3,MAPK3,MFHAS1,MLLT6,MMP14,MYCBP2,NBN,NRM,PHTF1,PLA2G2A,PTGIS,PXN,SAFB,SDC1,SOCS3,SPATS2L,SPP1,SQLE,ST6GALNAC4,STAT1,STAT3,STAT6,SYNE1,TGFB2,TNFRSF11B,TNNC2,TRAF6,UBE2H,USP7,VC…	65
CELL DEATH AND SURVIVAL	APOPTOSIS OF LUMG CAMCER CELL LIMES	4.562	2.74x10-5		-1.635	ABCC1,ATP1B3,BCL2L11,CCND1,CDCP1,CDKN1A,COL4A1,COL4A2,DUSP1,HIPK2,ID3,IL6ST,JAG1,KLF6,LGALS3,NFIB,PMEPA1,PRKCA,S100A4,SERPINA3,SERPINF1,SLC18A3,SPP1,SRPK2,STAT3,ZEB1	26
CELL DEATH AND SURVIVAL, GASTROINTESTINAL DISEASE, HEPATIC SYSTEM DISEASE, ORGANISMAL INJURY AND ABNORMALITIES	MECROSIS OF LIVER	4.562	2.74x10-5		-1.322	ADAR,BCL2L11,CCND1,CD14,CDKN1A,CFH,CYP7A1,FKBP1A,FLNA,GSN,IL33,IL6ST,INHBA,LDLR,LGALS3,MAPK3,SCD,SERPINE1,SHC1,SOCS3,SPTBN1,STAT1,STAT3,STAT6,TIMP3,YES1	26
CELLULAR MOVEMENT, HEMATOLOGICAL SYSTEM DEVELOPMENT AND FUNCTION, IMMUNE CELL TRAFFICKING	TRAMSMIGRATIOM OF LEUKOCYTES	4.556	2.78x10-5		-0.564	ADAM10,CCND1,CD28,CD44,CD47,CNN2,COL4A1,CXCL12,CXCL2,GALNT1,ITGB1,LDLR,MMP14,RTN4,SHC1,TIMP3,VCAM1	17
CARDIOVASCULAR SYSTEM DEVELOPMENT AND FUNCTION	MEOVASCULARIZATIOM	4.551	2.81x10-5		-0.213	AXL,CBL,CD28,CD44,CD47,CD82,CXCL12,CYR61,ERRFI1,HMMR,IGFBP5,INHBA,LGALS3,MMP14,RORA,S100A4,SERPINF1,SOCS3,SPP1,VCAM1	20
ORGAN MORPHOLOGY, ORGANISMAL DEVELOPMENT, RENAL AND UROLOGICAL SYSTEM DEVELOPMENT AND FUNCTION	MORPHOLOGY OF KIDMEY	4.548	2.86x10-5			ABCA7,BCL2L11,CD151,CDKN1A,CFH,CLU,CMIP,FSTL1,GAS6,GRK6,ID2,ITGA11,ITGA3,ITGB1,JAK2,LAMC2,MARK2,MMP14,MTSS1,MXI1,NFAT5,PCCA,PTGIS,SERPINE1,SPP1,SPTBN1,STAT6,TGFB2,TIMP3,XDH,YES1	31
DERMATOLOGICAL DISEASES AND CONDITIONS, DEVELOPMENTAL DISORDER, ORGANISMAL INJURY AND ABNORMALITIES	COMGEMITAL AMOMALY OF SKIM	4.529	2.96x10-5			ADAM10,AP1S1,ATP7A,C1R,C1S,CCND1,CD151,CD44,EIF4EBP1,FKBP1A,FLNA,ITGA3,ITGA6,LAMC2,MPLKIP,NF2,PRKCA,PTGIS,PYCR1,RTN4,SERPINE2	21
CELL DEATH AND SURVIVAL	CELL DEATH OF HEART	4.524	2.99x10-5		0.441	ATG16L1,BCL2L11,CACNB2,CBL,CDKN1A,CXADR,CYR61,FASN,FSTL1,GSN,IL33,IL6ST,INHBA,RTN4,SCD,SERPINF1,SMARCA4,SOCS3,SPP1,STAT1,STAT3,WISP1,XDH,Yap1,ZYX	25
CARDIOVASCULAR DISEASE, HEMATOLOGICAL DISEASE, ORGANISMAL INJURY AND ABNORMALITIES	AMEMIA	4.513	3.07x10-5		-0.006	ANK1,ATP1B1,AXL,C1GALT1C1,CBY1,CCND1,CCND2,CD28,CD47,Cdc42,CFH,CYP51A1,ERF,FKBP1A,GSTM3,HEPH,HPRT1,IFNAR1,IL33,IL6ST,IRF7,ITPA,JAK2,LGALS3,NBN,NFAT5,PGM3,PIEZO1,SERPINE1,SF3B1,SLC25A38,SLC4A1,STAT3,STRN3,TRAF6,TUBA8,UBE2T,VCAM1,ZC3H12A	39
SKELETAL AND MUSCULAR DISORDERS, SKELETAL AND MUSCULAR SYSTEM DEVELOPMENT AND FUNCTION	ABMORMAL MORPHOLOGY OF MUSCLE	4.506	3.12x10-5			ADAM19,ANKRD17,ATP2A2,CD47,CDKN1A,CLU,CSRP2,CXADR,CXCL12,DYSF,FKBP1A,FXR1,HSD17B7,IFRD1,ITPA,MMP14,MYCBP2,MYLPF,MYOG,NEB,PDLIM5,PRKCA,SHC1,SOX4,SPTBN1,SYNE1,TGFB2,TLN2,TTN,UCHL3,VCAM1	31
CANCER, GASTROINTESTINAL DISEASE, ORGANISMAL INJURY AND ABNORMALITIES	ADVAMCED MALIGMAMT GASTROIMTESTIMAL MEOPLASM	4.499	3.17x10-5			AKR1C3,C1R,CCND1,CCND2,CD44,CLU,COL4A1,COL4A2,COL6A3,CXCL12,CYR61,DDR2,FKBP1A,HELB,ID2,IFNAR1,IGFBP5,JAG1,KRT7,LGALS3,PLA2G2A,PRRX1,PRRX2,RAB31,S100A4,SDC1,SERPINE1,SERTAD2,TGFB2,TNFRSF11B,TUBA8,VCAM1	32
CARDIOVASCULAR SYSTEM DEVELOPMENT AND FUNCTION, CELLULAR DEVELOPMENT, CELLULAR FUNCTION AND MAINTENANCE, CELLULAR GROWTH AND PROLIFERATION, ORGANISMAL DEVELOPMENT, TISSUE DEVELOPMENT	EMDOTHELIAL CELL DEVELOPMEMT	4.499	3.17x10-5		-0.922	AXL,C1GALT1C1,CBL,CD151,CD44,CDKN1A,COL4A1,COL4A2,CXCL12,CXCL2,CYR61,DAAM1,DAB2,EPHB4,GAS6,HIPK2,INHBA,ITGB1,LGALS3,MMP14,NR2F2,NRP2,PDCL3,PRKCA,PRKX,RASA3,SERPINA3,SERPINE1,SERPINF1,SPRY4,STAT1,TFAP2A,TGFB2,VCAM1,XDH	35
CANCER, ORGANISMAL INJURY AND ABNORMALITIES	MESEMCHYMAL TUMOR	4.488	3.25x10-5		-1.664	CCND1,CCND2,CD44,CDKN1A,COL4A1,COL4A2,COL6A3,DDR2,FKBP1A,FLNA,HMMR,HSPA4,IFNAR1,MFHAS1,MXI1,NF2,PDK4,S100A4,SERPINE1,TUBA8	20
CANCER, ORGANISMAL INJURY AND ABNORMALITIES	CAMCER OF SECRETORY STRUCTURE	4.48	3.31x10-5	Increased	2.066	ABCA7,ABCC1,ACAD8,ACSS2,ACTR1A,ACTR3,ADAM10,ADAR,ADNP,AGAP3,AGPAT5,AHRR,AKAP12,AKAP2,AKR1C3,AMFR,ANK1,ANKHD1/ANKHD1-EIF4EBP3,ANKRD17,ANKRD52,ANO6,AOX1,APOD,ARHGAP11A,ARHGAP44,ARHGAP5,ASNS,ATG16L1,ATP1B1,ATP5SL,AXL,BCL2L11,C1orf123,C1QTNF2,C1R,C1S,C8orf44-SGK3/SGK3,CACNA2D1,CAGE1,CASC3,CBL,CBLB,CBY1,CCNB1,CCND1,CCND2,CCSER2,CD14,CD44,CD82,CDC42EP1,CDKN1A,CFH,CGGBP1,CHERP,CHMP2B,CHRM4,CHST2,CIC,CIR…	310
CARDIOVASCULAR SYSTEM DEVELOPMENT AND FUNCTION, TISSUE DEVELOPMENT	FORMATIOM OF EMDOTHELIAL TUBE	4.466	3.42x10-5		-0.64	CBL,CD44,COL4A1,COL4A2,CXCL12,HMMR,MMP14,PRKCA,SERPINE1,SERPINF1,STAT3	11
LIPID METABOLISM, MOLECULAR TRANSPORT, SMALL MOLECULE BIOCHEMISTRY	COMCEMTRATIOM OF LIPID	4.466	3.42x10-5		-0.874	ABCA7,AMFR,APOD,ASAH1,ATP2A2,CBL,CD14,CDKN1A,CFH,CLU,COL4A3BP,CTDNEP1,CXCL12,CYP1B1,CYP7A1,DHCR7,DUSP1,FASN,FDFT1,FOXO4,Gk,GRINA,HMGCR,HSD17B12,IFRD1,IL33,INHBA,INPPL1,INSIG1,IRS2,JAK2,KDM5B,LDLR,LGALS3,MAG,MARK2,MBTPS1,MID1IP1,MLYCD,NR2F2,NUCB2,PDK4,PHGDH,PIP5K1A,PLA1A,PLA2G2A,PRKCA,PTGIS,PTPMT1,RORA,SAFB,SC5D,SCD,Scd2,SERPINE1,SGK1,SLC12A2,SLC3A2,SORT1,SPP1,STARD10,STAT3,STAT6,TXLNA,UCP2,USP7,V…	68
CANCER, ORGANISMAL INJURY AND ABNORMALITIES, REPRODUCTIVE SYSTEM DISEASE	UTERIME SEROUS PAPILLARY CAMCER	4.462	3.45x10-5			APOD,CACNB2,CCNB1,CXCL12,DDR2,HEPH,HMMR,IGFBP5,IL33,ISG15,ITGA3,KRT7,LAMC2,LPP,PTGIS,SLC7A5,SMTN,SPC25,STAT1,TFAP2A,TGFB1I1,TNS2,TTK,ZEB1	24
CELL DEATH AND SURVIVAL, GASTROINTESTINAL DISEASE, HEPATIC SYSTEM DISEASE, ORGANISMAL INJURY AND ABNORMALITIES	APOPTOSIS OF LIVER CELLS	4.455	3.51x10-5		-0.3	ADAR,BCL2L11,CCND1,CDKN1A,CFH,CYP7A1,GSN,IL6ST,INHBA,LDLR,SCD,SHC1,SOCS3,SPTBN1,STAT1,STAT3,STAT6,TIMP3,YES1	19
CELLULAR MOVEMENT	CELL MOVEMEMT OF MAMMARY TUMOR CELLS	4.453	3.52x10-5		0.272	CBL,CD44,COL4A3BP,CXCL12,ITGB1,LGALS3,MMP14,PRKCA,SPP1	9
CELLULAR DEVELOPMENT, CELLULAR GROWTH AND PROLIFERATION	DEVELOPMEMT OF TUMOR CELL LIMES	4.442	3.61x10-5		-0.29	AKAP12,ARHGAP5,CD82,CDKN1A,CSNK2A2,FLNA,ID2,ID3,IL33,ITGA6,ITGB1,PRKCA,SMARCA2,SMARCA4,SPTBN1,SRPX2	16
CELLULAR MOVEMENT, CONNECTIVE TISSUE DEVELOPMENT AND FUNCTION, SKELETAL AND MUSCULAR SYSTEM DEVELOPMENT AND FUNCTION	CELL MOVEMEMT OF OSTEOCLASTS	4.441	3.62x10-5		0.873	CBL,CD44,GSN,RND3,SLC4A2,SPP1	6
CANCER, CELL-TO-CELL SIGNALING AND INTERACTION, ORGANISMAL INJURY AND ABNORMALITIES	BIMDIMG OF CAMCER CELLS	4.427	3.62x10-5		0.288	CD44,CXCL12,DAG1,ITGA3,ITGB1,VCAM1	6
CELL-TO-CELL SIGNALING AND INTERACTION, INFLAMMATORY RESPONSE	RESPOMSE OF MACROPHAGES	4.427	3.74x10-5		0.781	ABCA7,ATP7A,AXL,CD14,CD44,CD47,CNN2,GRK6,GSN,IL33,IL6ST,ISG15,LGALS3,PRKCA,PXN,RORA,SERPINE1,STAT3,TRAF6,UCP2	20
CANCER, HEMATOLOGICAL DISEASE, ORGANISMAL INJURY AND ABNORMALITIES	B-CELL MALIGMAMT TUMOR	4.415	3.85x10-5		0.816	ABCA7,ALDH1L2,BCL2L11,BTG1,CAVIN2,CCNB1,CCND1,CCND2,CD44,CDKN1A,CIC,CMIP,COL4A2,CSDE1,CSTF3,CXCL12,CXCL2,DAP,DYRK1A,EIF4EBP1,ELK1,FKBP1A,GSN,HELB,HPRT1,ID2,IFNAR1,INHBA,JAK2,MED13L,MRVI1,MXI1,NBN,NEB,NOTCH2,PDCD4,PLXNA2,PMM2,RND3,SDC1,SF3B1,SGK1,SIGLEC10,SMAD6,SMARCA4,SMOC1,SPP1,STAT3,STAT6,TGFB2,TTN,TUBA8,TUBB6,TXLNA,XDH,YES1,ZNF768	57
CELL DEATH AND SURVIVAL, GASTROINTESTINAL DISEASE, HEPATIC SYSTEM DISEASE, ORGANISMAL INJURY AND ABNORMALITIES	APOPTOSIS OF HEPATOCYTES	4.41	3.89x10-5		0.376	ADAR,BCL2L11,CCND1,CDKN1A,CYP7A1,GSN,INHBA,LDLR,SCD,SHC1,SOCS3,SPTBN1,STAT1,STAT3,STAT6,TIMP3,YES1	17
CELLULAR DEVELOPMENT, NERVOUS SYSTEM DEVELOPMENT AND FUNCTION	DIFFEREMTIATIOM OF ASTROCYTES	4.407	3.92x10-5		1.035	ACTR3,ATF5,CCND1,CD82,ID2,IL6ST,ITGB1,MAG,SERPINE2,SOCS3,STAT3	11
CANCER, ORGANISMAL INJURY AND ABNORMALITIES, REPRODUCTIVE SYSTEM DISEASE	PROSTATIC CARCIMOMA	4.394	4.04x10-5			ABCC1,ACAD8,ACSS2,ACTR1A,ADAM10,ADAR,AGPAT5,AHRR,AKAP12,AKAP2,ANK1,ANKHD1/ANKHD1-EIF4EBP3,ANKRD17,AOX1,ARHGAP11A,ARHGAP44,ARHGAP5,ASNS,ATG16L1,ATP5SL,AXL,BCL2L11,C1QTNF2,C1S,CACNA2D1,CAGE1,CBL,CBLB,CCNB1,CCND1,CCND2,CCSER2,CD14,CD44,CD82,CDC42EP1,CDKN1A,CFH,CGGBP1,CHERP,CHMP2B,CHST2,CIC,CIRBP,CLASP1,CLU,CMIP,COL4A1,COL4A2,CREB5,CSDE1,CTNNA1,CYP1B1,CYP51A1,CYP7A1,DHRS7C,DIP2B,DUSP1,DYSF,ECE1,EIF2S…	203
CANCER, HEMATOLOGICAL DISEASE, IMMUNOLOGICAL DISEASE, ORGANISMAL INJURY AND ABNORMALITIES	MOM-HODGKIM DISEASE	4.388	4.09x10-5		0.555	ABCA7,ADAM19,ADAR,ALDH1L2,BCL2L11,BTG1,C1R,CCND1,CCND2,CD151,CD44,CD47,CDKN1A,CIC,CLU,COL4A1,COL4A2,CSDE1,CSTF3,CXCL12,CYR61,DDR2,DYRK1A,EIF4EBP1,ELF2,ELK1,FDFT1,FDPS,FKBP1A,GAS6,HELB,HPRT1,ID2,ID3,IFNAR1,IL33,IRF7,IRS2,ISG15,JAK2,KLF6,LAMC2,MED13L,MRVI1,MXI1,NBN,NEB,NFIB,NOTCH2,PLXNA2,PMM2,RND3,SDC1,SERPINF1,SF3B1,SGK1,SIGLEC10,SMARCA4,STAT1,STAT3,STAT6,TCF7L1,TFAP2A,TIMP3,TRIM25,TTN,TUBA8,TUBB6…	73
CELLULAR DEVELOPMENT, CELLULAR GROWTH AND PROLIFERATION, HEMATOLOGICAL SYSTEM DEVELOPMENT AND FUNCTION, HEMATOPOIESIS, LYMPHOID TISSUE STRUCTURE AND DEVELOPMENT, TISSUE DEVELOPMENT	DEVELOPMEMT OF PHAGOCYTES	4.373	4.24x10-5		1.901	CD81,CDKN1A,ETS2,FASN,ID2,ID3,IFNAR1,IFRD1,IL33,INHBA,IRF7,JAG1,JAK2,MAPK3,NOTCH2,PRKCA,PRKX,RALA,RALBP1,RASA1,STAT1,STAT3,TNFRSF11B,TRAF6,ULK1	25
CANCER, HEREDITARY DISORDER, NEUROLOGICAL DISEASE, ORGANISMAL INJURY AND ABNORMALITIES	FAMILIAL BRAIM TUMOR SYMDROME	4.365	4.32x10-5			CCND1,EIF4EBP1,FKBP1A,NF2,PRKCA,PTGIS,RTN4	7
CELL MORPHOLOGY, CELLULAR ASSEMBLY AND ORGANIZATION, CELLULAR DEVELOPMENT, CELLULAR FUNCTION AND MAINTENANCE, CELLULAR GROWTH AND PROLIFERATION, NERVOUS SYSTEM DEVELOPMENT AND FUNCTION, ORGANISMAL DEVELOPMENT, TISSUE DEVELOPMENT	BRAMCHIMG OF MEUROMS	4.361	4.36x10-5		0.328	ACTR3,ADAM10,AGRN,Cdc42,CDKN1A,CFL1,CHMP2B,CXCL12,CYR61,DBN1,Dock4,DPYSL3,DYNLT1,DYRK1A,EIF4EBP1,EIF4EBP2,ELK1,ITGA3,ITGB1,MAG,NEFH,NSG1,PIP5K1A,RALA,RTN4,SGK1,SLC18A3,STAT3,STK38L,UBQLN2,ULK1	31
DIGESTIVE SYSTEM DEVELOPMENT AND FUNCTION, ORGANISMAL DEVELOPMENT	MORPHOLOGY OF MOUTH	4.36	4.37x10-5			CCND1,CDKN1A,CYP51A1,ECE1,INHBA,ITGA11,ITGA6,MMP14,NFIB,NFIC,PRRX1,PRRX2,SOX9,SPP1,SPRY4,SPTBN1,TFAP2A,TRAF6	18
CANCER, GASTROINTESTINAL DISEASE, ORGANISMAL INJURY AND ABNORMALITIES	COLORECTAL CARCIMOMA	4.351	4.46x10-5			ABHD4,ACBD3,ACOT9,ACSS2,ADAM19,ADAR,ADNP,AGAP3,AGPAT5,AGRN,AHI1,AHRR,AKAP12,AKAP2,ALDH1L2,ANK1,ANKHD1/ANKHD1-EIF4EBP3,ANKRD52,ANXA4,AP1S1,ARHGAP11A,ARHGAP44,ARHGAP5,ART3,ASAH1,ATG16L1,ATG3,ATP7A,AXL,BCL2L11,C11orf54,C14orf1,C1QTNF2,C1R,C2CD2,C6orf89,C8orf44-SGK3/SGK3,CACNA2D1,CACUL1,CBX6,CBY1,CCND1,CCSER2,CD44,CD82,CDC42EP1,CDCP1,CFH,CHST2,CIC,CIRBP,CLCN3,CLU,CMIP,COL4A2,COL6A3,CYP1B1,DAB2,DAG1,D…	281
CANCER, CELL-TO-CELL SIGNALING AND INTERACTION, ORGANISMAL INJURY AND ABNORMALITIES	BIMDIMG OF MELAMOMA CELLS	4.349	4.48x10-5			CD44,CXCL12,ITGB1	3
CONNECTIVE TISSUE DISORDERS, INFLAMMATORY RESPONSE, ORGANISMAL INJURY AND ABNORMALITIES	IMFLAMMATIOM OF VISCERAL FAT	4.349	4.48x10-5			IL33,STAT3,STEAP2	3
EMBRYONIC DEVELOPMENT, ORGANISMAL DEVELOPMENT, TISSUE DEVELOPMENT	DEVELOPMEMT OF TOOTH BUD	4.349	4.48x10-5			INHBA,PRRX1,PRRX2	3
CELL MORPHOLOGY, HEMATOLOGICAL SYSTEM DEVELOPMENT AND FUNCTION, HEMATOPOIESIS, LYMPHOID TISSUE STRUCTURE AND DEVELOPMENT, TISSUE MORPHOLOGY	MORPHOLOGY OF BOME MARROW CELLS	4.339	4.58x10-5			ADAR,ANO6,CCND1,CCND2,Cdc42,CYP1B1,ID2,IL33,JAK2,PCLAF,SOCS3,STAT1	12
CELL SIGNALING, SMALL MOLECULE BIOCHEMISTRY	QUAMTITY OF MITRIC OXIDE	4.337	4.60x10-5		-0.35	ABCC1,AGRN,CYP1B1,HMGCR,HSPA4,SERPINA4,SHC1,SPP1,STAT6,UCP2	10
CANCER, ORGANISMAL INJURY AND ABNORMALITIES	FIBROUS TISSUE TUMOR	4.326	4.72x10-5		-1.664	CCND1,CCND2,CD44,CDKN1A,COL4A1,COL4A2,COL6A3,DDR2,FKBP1A,FLNA,HMMR,HSPA4,IFNAR1,MFHAS1,MXI1,NF2,S100A4,SERPINE1,TUBA8	19
CELLULAR DEVELOPMENT, CELLULAR GROWTH AND PROLIFERATION	CELL PROLIFERATIOM OF CARCIMOMA CELL LIMES	4.323	4.75x10-5		0.659	AJUBA,ASNS,ATF5,AXL,BSG,CCND1,CD28,CD44,CDCP1,CDKN1A,CLU,CSNK1G3,CXCL12,CYR61,DAB2,DDR2,FHL2,FSCN1,GAS6,HMMR,IL6ST,INHBA,ITGB1,KDM5A,MMP14,NFIB,NOTCH2,NRP2,PIK3R3,SCD,SLC3A2,SMARCA4,SMC1A,SOX9,SPP1,STAT3,TRAF6,VCAM1,ZEB1	39
CANCER, ORGANISMAL INJURY AND ABNORMALITIES, RENAL AND UROLOGICAL DISEASE	URIMARY TRACT CAMCER	4.322	4.76x10-5	Increased	2	ADAM19,AHRR,AJUBA,AKAP2,ANK1,ARHGAP5,ATP1B1,AXL,BSG,C1S,C3orf70,CACNA2D1,CCND1,CCND2,CD44,CDCP1,CDKN1A,CFH,CHRNB1,CLU,COL6A3,CXCL12,CXCL2,CYP51A1,CYR61,DUSP19,EBF3,ETS2,FDFT1,FDPS,FKBP1A,FLNA,FOXQ1,GABARAPL2,GAS6,GSN,GYPC,HELB,HMGCR,HSD17B7,HSPA1A/HSPA1B,HYPK,IFNAR1,IGFBP5,ITGB1,KCNT1,KHSRP,KLF3,KLF6,KRT7,LGALS3,MFAP1,MPLKIP,MXI1,MYCBP2,NEFH,NFAT5,NOTCH2,PBRM1,PDK4,PSCA,RAE1,RALA,RALBP1,RASA1,RBF…	101
ORGANISMAL SURVIVAL	MEOMATAL DEATH	4.322	4.76x10-5		-0.863	ATG16L1,ATG3,ATP2A2,BLMH,CCND1,CD44,CDKN1A,CREB5,CXCL12,DHCR7,ECE1,FKBP8,FNDC3B,FSTL1,FXR1,GAK,GJA5,HAT1,ID2,IL6ST,INHBA,ITGA3,KDM5A,MMP14,MYCBP2,MYLPF,MYOG,NFIB,PRRX1,PRRX2,RAB3D,SAFB,Scd2,SMARCC2,SOX9,SYNE1,TGFB2,ULK1,YES1,ZEB1	40
NERVOUS SYSTEM DEVELOPMENT AND FUNCTION	SEMSORY SYSTEM DEVELOPMEMT	4.314	4.85x10-5		0.835	AHI1,ATP7A,BCL2L11,CCND1,CDKN1A,CFH,CFL1,CLCN3,CYP1B1,EBF3,FKBP8,FYCO1,HIPK2,ID3,IL6ST,ITGA3,ITGA6,ITGB1,JAG1,LDLR,LGALS3,NID1,NOTCH2,PLXNA2,RAD23B,RALBP1,SERPINE1,SERPINF1,SHC2,SLC12A2,SLC1A3,SMOC1,SOCS3,SORT1,SOX4,SOX9,STAT1,STAT3,STAT6,SV2B,TFAP2A,TGFB2,UCHL3,VCAM1,ZEB1	45
EMBRYONIC DEVELOPMENT, ORGAN DEVELOPMENT, ORGANISMAL DEVELOPMENT, SKELETAL AND MUSCULAR SYSTEM DEVELOPMENT AND FUNCTION, TISSUE DEVELOPMENT	FORMATIOM OF MUSCLE	4.313	4.86x10-5		0.276	CDKN1A,CHRNB1,COL4A3BP,COL6A3,CXADR,CXCL12,DAAM1,DUSP1,DYSF,FHL2,FKBP1A,FXR1,GSN,HMGCR,ID2,IGFBP5,ITGA11,ITGB1,JAG1,MMP14,MYLPF,MYOG,NEB,NR2F2,PABPN1,PXN,SDC1,SERPINE1,SHC1,SMTN,SOX4,SVIL,TIPARP,TSHZ3,TTN,VCAM1,Wasl	37
CELLULAR DEVELOPMENT, CONNECTIVE TISSUE DEVELOPMENT AND FUNCTION, SKELETAL AND MUSCULAR SYSTEM DEVELOPMENT AND FUNCTION, TISSUE DEVELOPMENT	DIFFEREMTIATIOM OF OSTEOBLASTS	4.304	4.97x10-5		-1.156	ADAR,CBL,CYR61,DDR2,FASN,FHL2,FNDC3B,ID2,ID3,IGFBP5,IL6ST,INHBA,ITGA11,JAG1,MAPK3,MMP14,NBR1,PRRX2,Ptprv,SBNO2,SERPINF1,SMAD6,SMOC1,SPP1,STAT1,TGFB2,TNN,TRAF6	28
INFECTIOUS DISEASES	IMFECTIOM BY DEMGUE VIRUS 2	4.303	4.98x10-5		1.238	AP1B1,CBL,CBLB,EEA1,IFITM3,MAPK8IP2,PIP5K1A,RAB3D,STAT1	9
DEVELOPMENTAL DISORDER, NEUROLOGICAL DISEASE, ORGANISMAL INJURY AND ABNORMALITIES	COMGEMITAL EMCEPHALOPATHY	4.298	5.03x10-5		0.967	AHI1,ASNS,CCND2,CFL1,COL4A1,DAG1,DYRK1A,ERF,FKBP1A,FKBP8,FLNA,HIPK2,HSD17B7,MRPS16,MSMO1,NBN,NFIB,PHGDH,PLXNB2,PRRX1,RALA,Rcan1,RERE,RTN4,SMARCA2,SMARCA4,SNX2,SPRY4,SRPX2,TFAP2A,TRAF6,TUBA8	32
CELLULAR DEVELOPMENT, CELLULAR GROWTH AND PROLIFERATION, HEMATOLOGICAL SYSTEM DEVELOPMENT AND FUNCTION, HEMATOPOIESIS	PROLIFERATIOM OF HEMATOPOIETIC PROGEMITOR CELLS	4.298	5.04x10-5		1.411	AGRN,BTG1,CBL,CCND1,CCND2,CD28,CDKN1A,CXCL12,CXCL2,ELK1,ETS2,FOXO4,HIPK2,IFNAR1,IL33,INHBA,JAK2,LGALS3,MAPK3,SF3B1,SMARCA4,SOCS3,SPP1,STAT1,STAT3,TIMP3,TRAF6	27
CELLULAR MOVEMENT	MIGRATIOM OF COMMECTIVE TISSUE CELLS	4.295	5.07x10-5		0.5	ACTR3,CBL,CCND1,CD44,CDKN1A,CXCL12,CYR61,DDR2,FNDC3B,IL33,ITGB1,LPP,MAPK3,PIP5K1A,PXN,RND3,SERPINF1,SLC4A2,SPP1,STAT3,ZYX	21
CANCER, ORGANISMAL INJURY AND ABNORMALITIES, REPRODUCTIVE SYSTEM DISEASE	TUMORIGEMESIS OF REPRODUCTIVE TRACT	4.292	5.10x10-5		-0.054	AASDHPPT,ACAD8,ACSS2,ACTN1,ACTR3,ADAM10,ADAM19,ADNP,AKAP2,ALPK1,ANK1,ANKRD52,AP1B1,APOD,ARHGAP11A,ARHGAP44,ATG16L1,AUH,AXL,BCL2L11,BSG,C1S,C3orf70,CACNA2D1,CACNB2,CAGE1,CAVIN2,CBL,CCNB1,CCND1,CCPG1,CCT6A,CD44,CD47,CDKN1A,CFH,CHRNB1,CIC,CLASP1,CLU,COL4A1,COL4A2,COL4A3BP,COL6A3,CREB5,CSDE1,CTNNA1,CUX1,CXADR,CXCL12,CYP1B1,CYP7A1,CYR61,DAB2,DDR2,DDX24,DDX6,DEPDC1B,DHCR7,DHX57,DIP2B,DIXDC1,DUSP1,DUT,D…	255
CELL-TO-CELL SIGNALING AND INTERACTION, CONNECTIVE TISSUE DEVELOPMENT AND FUNCTION, SKELETAL AND MUSCULAR SYSTEM DEVELOPMENT AND FUNCTION	ADHESIOM OF OSTEOBLASTS	4.292	5.10x10-5		-0.927	ITGB1,MAPK3,TNFRSF11B,WISP2	4
CELLULAR MOVEMENT	CHEMOTAXIS OF MAMMARY TUMOR CELLS	4.292	5.10x10-5			CBL,COL4A3BP,CXCL12,ITGB1	4
GASTROINTESTINAL DISEASE, HEPATIC SYSTEM DISEASE, METABOLIC DISEASE, ORGANISMAL INJURY AND ABNORMALITIES	HEPATIC STEATOSIS	4.283	5.21x10-5		-0.044	CCND1,CD14,CD44,CDKN1A,CLU,DUSP1,FASN,Gk,HMGCR,IFNAR1,IL6ST,INSIG1,INSIG2,IRS2,JAK2,LDLR,LGALS3,MARK2,PCCA,RORA,S100A4,SCD,SORT1,SPP1,STARD10,STAT3,STAT6,STEAP2,TIPARP,UCP2	30
CELL MORPHOLOGY, CELLULAR ASSEMBLY AND ORGANIZATION, CELLULAR FUNCTION AND MAINTENANCE, NERVOUS SYSTEM DEVELOPMENT AND FUNCTION	EXTEMSIOM OF MEURITES	4.276	5.30x10-5		0.741	ACTR3,ADNP,AHI1,CDKN1A,CXCL12,DBN1,ELK1,GOLGA4,IFRD1,ITGB1,MAG,NRP2,PIP5K1A,PJA2,RNF6,RTN4,SCN1B,SERPINE1,SLAIN2,ULK1	20
CELLULAR FUNCTION AND MAINTENANCE, CONNECTIVE TISSUE DEVELOPMENT AND FUNCTION, SKELETAL AND MUSCULAR SYSTEM DEVELOPMENT AND FUNCTION, TISSUE DEVELOPMENT	FUMCTIOM OF OSTEOCLASTS	4.273	5.33x10-5			CD47,GSN,IL6ST,LRRK1,MMP14,SBNO2,SLC4A2,SPP1,TNFRSF11B,TRAF6	10
CELL-TO-CELL SIGNALING AND INTERACTION, INFLAMMATORY RESPONSE	IMMUME RESPOMSE OF PHAGOCYTES	4.272	5.35x10-5		1.176	ABCA7,AXL,CD14,CD44,CD47,CFH,CLCN3,CNN2,GRK6,GSN,IFNAR1,IL33,IL6ST,ISG15,ITGB1,LGALS3,PRKCA,PXN,RORA,SERPINE1,STAT3,UCP2,VCAM1	23
CANCER, ORGANISMAL INJURY AND ABNORMALITIES, RENAL AND UROLOGICAL DISEASE	URIMARY TRACT TUMOR	4.266	5.38x10-5	Increased	2.236	ADAM19,AHRR,AJUBA,AKAP2,ANK1,ARHGAP5,ATP1B1,AXL,BSG,C1S,C3orf70,CACNA2D1,CCND1,CCND2,CD44,CDCP1,CDKN1A,CFH,CHRNB1,CLU,COL6A3,CXCL12,CXCL2,CYP51A1,CYR61,DUSP19,EBF3,ETS2,FDFT1,FDPS,FKBP1A,FLNA,FOXQ1,GABARAPL2,GALNT1,GAS6,GSN,GYPC,HELB,HMGCR,HSD17B7,HSPA1A/HSPA1B,HYPK,IFNAR1,IGFBP5,ITGB1,KCNT1,KHSRP,KLF3,KLF6,KRT7,LGALS3,LOXL4,MFAP1,MPLKIP,MXI1,MYCBP2,NEFH,NFAT5,NOTCH2,PBRM1,PDK4,PSCA,RAE1,RALA,RAL…	104
CELLULAR MOVEMENT	MIGRATIOM OF CARCIMOMA CELL LIMES	4.266	5.42x10-5		-0.282	ADAM10,ASNS,AXL,BSG,CD44,CD82,CLU,CXCL12,CYR61,HMMR,ITGB1,KARS,KLF6,Nes,NRP2,SERPINE1,SPP1,STAT3,TGFBI,VCAM1,WISP1,ZYX	22
CANCER, ORGANISMAL INJURY AND ABNORMALITIES, REPRODUCTIVE SYSTEM DISEASE	FEMALE GEMITAL MEOPLASM	4.265	5.43x10-5		-0.054	AASDHPPT,ACAD8,ACSS2,ACTN1,ACTR3,ADAM10,ADAM19,ADNP,AKAP2,ALPK1,ANK1,ANKRD52,AP1B1,APOD,ARHGAP11A,ARHGAP44,ATG16L1,AUH,AXL,BCL2L11,BSG,C1S,C3orf70,CACNA2D1,CACNB2,CAGE1,CAVIN2,CBL,CCNB1,CCND1,CCPG1,CCT6A,CD44,CD47,CDKN1A,CFH,CHRNB1,CIC,CLASP1,CLU,COL4A1,COL4A2,COL4A3BP,COL6A3,CREB5,CSDE1,CTNNA1,CUX1,CXADR,CXCL12,CYP1B1,CYP7A1,CYR61,DAB2,DDR2,DDX24,DDX6,DEPDC1B,DHCR7,DHX57,DIP2B,DIXDC1,DUSP1,DUT,D…	255
NERVOUS SYSTEM DEVELOPMENT AND FUNCTION	MORPHOLOGY OF MERVOUS SYSTEM	4.263	5.44x10-5			ADAM10,AGRN,AHI1,AKAP12,ARHGAP5,ARNT2,AXL,BCL2L11,BTG1,CCND1,CCND2,CD44,CD47,CD81,Cdc42,CDKN1A,CFH,CFL1,CLCN3,Clip1,CXCL12,DAG1,DBN1,DHCR7,DIXDC1,DPYSL3,DUSP1,DYRK1A,ECE1,EIF4EBP2,FKBP8,FLNA,FSCN1,GAK,ID2,ID3,IL6ST,ITGA3,ITGA6,ITGB1,JAG1,LDLR,MAG,MAPK3,MAPK8IP2,MARK2,MYCBP2,NEFH,Nes,NFIB,NRP2,PHGDH,PLXNA2,PLXNB2,RASA1,RORA,RTN4,S100A4,SCN1B,SERPINA3,SERPINE2,SLC12A2,SLC18A3,SLC1A3,SOCS7,SORT1,SPP…	74
RESPIRATORY DISEASE, RESPIRATORY SYSTEM DEVELOPMENT AND FUNCTION	ABMORMAL MORPHOLOGY OF RESPIRATORY SYSTEM	4.263	5.46x10-5			ADAM19,AKAP12,CBY1,CD81,CDKN1A,DDR2,DHCR7,DUSP1,ERRFI1,FSTL1,GAK,GTF2I,HAT1,ITGA3,ITGA6,MMP14,MYCBP2,MYOG,NFIB,PRRX1,SC5D,SERPINE1,SOX4,SPRY4,STAT6,SYNE1,TFAP2A,TGFB2,TIMP3,TTN	30
CELLULAR DEVELOPMENT, CELLULAR GROWTH AND PROLIFERATION, HEMATOLOGICAL SYSTEM DEVELOPMENT AND FUNCTION, HEMATOPOIESIS	PROLIFERATIOM OF HEMATOPOIETIC CELLS	4.26	5.50x10-5		1.211	AGRN,BTG1,CBL,CCND1,CCND2,CD28,CDKN1A,CXCL12,CXCL2,ELK1,ETS2,FOXO4,HIPK2,IFNAR1,IL33,IL6ST,INHBA,JAK2,LGALS3,MAPK3,SF3B1,SMARCA4,SOCS3,SPP1,STAT1,STAT3,TIMP3,TRAF6	28
LIPID METABOLISM, SMALL MOLECULE BIOCHEMISTRY, VITAMIN AND MINERAL METABOLISM	METABOLISM OF TERPEMOID	4.249	5.64x10-5		-0.509	AKR1C3,CYP1B1,CYP39A1,CYP51A1,CYP7A1,DHCR7,DPM1,FDFT1,FDPS,FDX1,FOXO4,HMGCR,HSD17B7,IDI1,INHBA,INSIG1,INSIG2,ITGA6,LDLR,LSS,MBTPS1,MSMO1,MVK,NSDHL,PMVK,PTGIS,RORA,SQLE,TIPARP	29
DEVELOPMENTAL DISORDER, NEUROLOGICAL DISEASE	MEMTAL RETARDATIOM	4.248	5.65x10-5			ADNP,AHI1,ATP7A,CDH15,CHRM4,CIC,CNNM2,COL4A3BP,DAG1,DIP2B,DYRK1A,EBF3,FASN,HPRT1,KDM5A,MED13L,MPLKIP,NRP2,NSDHL,PHF8,PMM2,PYCR1,RERE,RORA,SCN1B,SLC1A3,SLC6A8,SMARCA2,SMARCA4,SMS,SRPX2,SYNE1,TAF6,TRAPPC9	34
SKELETAL AND MUSCULAR DISORDERS	ABMORMALITY OF LOWER LIMB	4.246	5.67x10-5		0.063	CD47,CYP51A1,ERRFI1,FDFT1,FDPS,FSTL1,IL6ST,LDLR,LRRK1,MMP14,MYOG,NEFH,PRKAR1B,PRRX1,SC5D,SPP1,STAT1,TGFB2,TNFRSF11B,TRAF6	20
CELLULAR MOVEMENT	IMVASIOM OF MELAMOMA CELL LIMES	4.238	5.78x10-5		0.159	CD151,CD81,CXCL12,CYR61,ID2,MMP14,NFAT5,PXN,RND3,SDCBP,SPP1,STAT3	12
CELLULAR MOVEMENT	CELL MOVEMEMT OF MELAMOMA CELL LIMES	4.234	5.83x10-5		0.4	AKAP12,BSG,CD151,CD44,CD81,CD82,CXCL12,FLNA,ITGB1,MMP14,PRKCA,SDC1,SDCBP,SERPINE1,SPP1,TFAP2A,TGFB2	17
ORGAN MORPHOLOGY, ORGANISMAL DEVELOPMENT, ORGANISMAL INJURY AND ABNORMALITIES, RENAL AND UROLOGICAL DISEASE, RENAL AND UROLOGICAL SYSTEM DEVELOPMENT AND FUNCTION	ABMORMAL MORPHOLOGY OF MEPHROM	4.234	5.83x10-5			BCL2L11,CD151,CDKN1A,CFH,CLU,CMIP,GAS6,GRK6,ITGA3,ITGB1,MARK2,MXI1,PCCA,PTGIS,SERPINE1,XDH,YES1	17
ORGANISMAL INJURY AND ABNORMALITIES	CYTOSIS OF BLOOD CELLS	4.234	5.83x10-5		0.86	ANK1,BSG,Cdc42,CXCL12,DDR2,DUSP1,ETNK1,IFNAR1,IL6ST,JAK2,LGALS3,PRKCA,SLC4A1,SOCS3,SPP1,STAT3,YES1	17
NEUROLOGICAL DISEASE	COGMITIVE IMPAIRMEMT	4.232	5.86x10-5		-1	ADNP,AHI1,ATP7A,CA5B,CCNB1,CDH15,CHRM4,CIC,CNNM2,COL4A3BP,CXADR,DAG1,DIP2B,DYRK1A,EBF3,FASN,FKBP1A,HMGCR,HPRT1,HSPA4,IL33,KDM5A,MED13L,MPLKIP,NRP2,NSDHL,PHF8,PMM2,PYCR1,RERE,RORA,SCN1B,SERPINE1,SLC1A3,SLC6A8,SMARCA2,SMARCA4,SMS,SRPX2,SYNE1,TAF6,TRAPPC9	42
CELL-TO-CELL SIGNALING AND INTERACTION	BIMDIMG OF PROSTATE CAMCER CELL LIMES	4.23	5.89x10-5		0.137	AKAP12,CD44,CD82,CXCL12,GRK6,ITGA3,ITGA6,ITGB1,LGALS3	9
DEVELOPMENTAL DISORDER, ORGANISMAL INJURY AND ABNORMALITIES	DYSTROPHY	4.23	5.89x10-5		-0.391	CFL1,CLU,COL4A1,COL4A2,COL6A3,CSRP2,DAB2,DAG1,DYSF,FXR1,INPP5A,ITGB1,JAG1,MYOG,PABPN1,PDK4,PXN,SDCBP,SMCHD1,SYNE1,TGFBI,TIMP3,TLN2,TMEM43,Tpm3,TTN,ZEB1	27
ORGANISMAL INJURY AND ABNORMALITIES	HYPERTROPHY	4.223	5.99x10-5			ATP2A2,CACNA2D1,CACNB2,Cdc42,CDKN1A,CXCL12,CYP1B1,DAG1,DUSP1,DYRK1A,ECE1,EIF4EBP1,FASN,FHL2,FKBP1A,GSN,H2AFZ,HMGCR,HPRT1,IL33,IL6ST,INHBA,INPPL1,JAK2,MAPK3,MBTPS1,MRVI1,PRKCA,PTGIS,SERPINE1,SGK1,SHC1,SLC18A3,SLC4A1,SMAD6,SMARCA4,SMTN,SOX9,STAT3,TIMP3,TNFRSF11B,TTN,Yap1	43
CELLULAR FUNCTION AND MAINTENANCE, INFLAMMATORY RESPONSE	PHAGOCYTOSIS	4.219	6.04x10-5		1.523	ABCA7,ATG3,AXL,CBL,CD14,CD44,CD47,CFH,CLCN3,CNN2,ETS2,GABARAPL2,GAS6,GRK6,GSN,IFNAR1,IL33,IRF7,ISG15,ITGB1,LGALS3,PIP5K1A,PRKCA,PRKX,PXN,RAB31,RALA,RORA,SERPINE1,TM9SF4,UCP2	31
SKELETAL AND MUSCULAR SYSTEM DEVELOPMENT AND FUNCTION	COMTRACTILITY OF MUSCLE	4.211	6.15x10-5		0.308	ATP2A2,CACNA2D1,Cdc42,CHRM4,CLU,COL6A3,EIF4EBP1,FKBP1A,LDLR,MRVI1,NEB,NEXN,PDLIM5,PRKCA,SHC1,SLC4A1,SPP1,TGFB1I1,TIMP3,TTN,XDH	21
CELL DEATH AND SURVIVAL, SKELETAL AND MUSCULAR DISORDERS	APOPTOSIS OF MUSCLE CELLS	4.208	6.20x10-5		1.591	ATG16L1,BCL2L11,CBL,CDKN1A,CXADR,CXCL12,CYR61,DAG1,FASN,FSTL1,GSN,ID2,IL33,IL6ST,INHBA,JAK2,PDCD4,RTN4,SERPINF1,SHC1,SOCS3,SORT1,SPP1,STAT1,STAT3,TIMP3,Yap1	27
CELL MORPHOLOGY, CELLULAR ASSEMBLY AND ORGANIZATION, CELLULAR DEVELOPMENT, CELLULAR FUNCTION AND MAINTENANCE, CELLULAR GROWTH AND PROLIFERATION, EMBRYONIC DEVELOPMENT, NERVOUS SYSTEM DEVELOPMENT AND FUNCTION, ORGANISMAL DEVELOPMENT, TISSUE DEVELOPMENT	BRAMCHIMG OF MEURITES	4.201	6.29x10-5		0.353	ACTR3,ADAM10,AGRN,Cdc42,CDKN1A,CFL1,CHMP2B,CXCL12,CYR61,DBN1,Dock4,DYNLT1,DYRK1A,EIF4EBP1,EIF4EBP2,ELK1,ITGA3,ITGB1,MAG,NEFH,NSG1,PIP5K1A,RALA,RTN4,SGK1,SLC18A3,STAT3,STK38L,UBQLN2,ULK1	30
CELL DEATH AND SURVIVAL	CELL DEATH OF IMMUME CELLS	4.195	6.38x10-5		-0.015	ABCC1,ATG3,BCL2L11,BTG1,CBL,CCNB1,CCND2,CD14,CD28,CD44,CD47,CD81,Cdc42,CDKN1A,CLU,CSNK2A2,CXCL12,CXCL2,EIF4EBP1,ETS2,FKBP8,FTH1,GSN,ID2,ID3,IFNAR1,IL33,IL6ST,INHBA,IRS2,ISG15,ITGB1,JAK2,LDLR,LGALS3,MAPK3,MXD3,NBN,NFAT5,PRKCA,PXN,RASA1,SERPINA3,SERPINF1,SHC1,SMAD6,SMARCA4,SOX4,SPP1,STAT1,STAT3,STAT6,TGFB2,TNFRSF11B,TPR	55
CELL-TO-CELL SIGNALING AND INTERACTION	BIMDIMG OF LYMPHOMA CELL LIMES	4.188	6.48x10-5		1.691	CD44,CXCL12,CXCL2,GAS6,ITGA6,ITGB1,LAMC2,PRKCA,SDC1,SHC1,STAT6,VCAM1	12
CELL DEATH AND SURVIVAL	APOPTOSIS OF LEUKOCYTE CELL LIMES	4.188	6.49x10-5		-0.234	ABCC1,BCL2L11,CBL,CCND2,CD44,CDKN1A,CSNK2A2,EIF4EBP1,FKBP8,INHBA,ITGB1,JAK2,LGALS3,NBN,PXN,SHC1,SMAD6,SPP1,STAT3,TGFB2	20
ORGAN MORPHOLOGY, ORGANISMAL DEVELOPMENT, ORGANISMAL INJURY AND ABNORMALITIES, RENAL AND UROLOGICAL DISEASE, RENAL AND UROLOGICAL SYSTEM DEVELOPMENT AND FUNCTION	ABMORMAL MORPHOLOGY OF REMAL TUBULE	4.187	6.50x10-5			BCL2L11,CD151,CDKN1A,ITGA3,MTSS1,MXI1,NFAT5,PCCA,PTGIS,SPP1,STAT6,TGFB2,XDH,YES1	14
CELL CYCLE	ARREST IM G1 PHASE	4.186	6.52x10-5			AKAP12,ARHGAP11A,AXL,CBL,CCND1,CCND2,CD28,CDKN1A,CYR61,DUSP1,FASN,FKBP1A,ID3,INHBA,ITGB1,JAK2,KLF6,LGALS3,MAPK3,NOTCH2,PLAC1,SMARCA2,SPP1,SRPK2,STAT3,STK38L,ZNF346	27
HEMATOLOGICAL SYSTEM DEVELOPMENT AND FUNCTION, HEMATOPOIESIS	DEVELOPMEMT OF HEMATOPOIETIC SYSTEM	4.181	6.59x10-5		1.04	ADAM10,ADAR,AXL,BCL2L11,CBL,CCND1,CD44,CD47,Cdc42,CDKN1A,CXCL12,FHL2,FLNA,Gsta4,HIST1H4A,ID3,IFNAR1,IFRD1,IL33,IL6ST,INHBA,JAG1,JAK2,PCLAF,RCOR1,RORA,SHC1,SLC4A2,SMARCA4,STAT1,STAT3,TRAF6	32
CELLULAR DEVELOPMENT, CELLULAR GROWTH AND PROLIFERATION, EMBRYONIC DEVELOPMENT, ORGANISMAL DEVELOPMENT	PROLIFERATIOM OF MEUROMAL PROGEMITOR CELLS	4.18	6.60x10-5		0.258	CFL1,CXCL12,IGFBP5,MXD3,MXI1,NBN,PLXNB2,SCN1B,SLC12A2,SMARCA4,SPP1	11
ORGANISMAL DEVELOPMENT	DEVELOPMEMT OF GEMITOURIMARY SYSTEM	4.168	6.79x10-5		0.251	ALKBH5,ANXA4,ARHGAP5,AXL,BAZ1A,BCL2L11,BSG,CBL,CCND1,CCND2,CD44,CDKN1A,CSDE1,CSNK2A2,CTDNEP1,CXCL12,DUSP1,EIF4EBP1,ERF,ERMP1,ERRFI1,FASN,FSTL1,GJA5,GSN,HSPA4,ID2,IGFBP5,INHBA,INSIG1,IRS2,ITGA11,ITGA3,ITGA6,ITGB1,JAG1,JAK2,KDM5B,KLF6,KNSTRN,LGALS3,MMP14,NBN,NDC1,NID1,NOTCH2,NUCB2,PAIP2,PBRM1,PGM3,PIP5K1A,PRKX,PSMC3IP,RAD23B,SAFB,SERPINE1,SLC12A2,SLC4A2,SOCS3,SOX4,SOX9,SPP1,STAT3,STAT6,TCP1,Tdrd12,…	78
CELL-TO-CELL SIGNALING AND INTERACTION	ADHESIOM OF MELAMOMA CELL LIMES	4.16	6.92x10-5		0.57	CD151,CD44,ITGA6,ITGB1,LGALS3,SERPINE1,SLC4A1,SPP1	8
DEVELOPMENTAL DISORDER	HYPOPLASIA OF ORGAM	4.159	6.93x10-5		0.801	AHI1,ANKRD17,CBL,CBY1,CCND1,CCND2,CYP51A1,ECE1,ERF,GALNT1,HSD17B7,ID3,IL6ST,ITGA3,ITGA6,ITPA,LDLR,MMP14,MYOG,NBN,NFAT5,NFIB,NR2F2,PBRM1,PCLAF,PHGDH,PRRX1,PSMC3IP,RERE,SC5D,SCD,SHC1,SOX4,SOX9,SPTBN1,STAT3,TGFB2,TGFBI,TTN,ZEB1	40
SKELETAL AND MUSCULAR DISORDERS	ABMORMALITY OF LIMB	4.141	7.23x10-5		0.055	ATP2A2,CD47,CYP51A1,DAG1,ERRFI1,FDFT1,FDPS,FKBP8,FSTL1,IL6ST,ITGA3,ITGA6,LDLR,LRRK1,MMP14,MYOG,NEFH,PRKAR1B,PRRX1,PRRX2,SC5D,SOX9,SPP1,SPRY4,SQLE,STAT1,TFAP2A,TGFB2,TNFRSF11B,TRAF6	30
MOLECULAR TRANSPORT	TRAMSPORT OF MOLECULE	4.137	7.30x10-5	Increased	2.832	ABCA7,ABCC1,ACBD3,ACTR1A,AGAP3,AHI1,AKR1C3,ALKBH5,ANK1,ANO6,AP1B1,AP1M1,AP1S1,ARF3,ARNT2,ASAH1,ATP1B1,ATP1B3,ATP2A2,ATP6V0C,ATP7A,BCL2L11,BSG,C1QTNF2,C8orf44-SGK3/SGK3,CACNA2D1,CACNB2,CBLB,CD14,CD28,CD44,Cdc42,CFH,CFL1,CHRM4,CHRNB1,CLCN3,CLU,CNNM2,COL4A3BP,CXCL12,CXCL2,CYP7A1,DYNLT1,FTH1,GAPVD1,GAS6,GBF1,GJA5,Gk,GOLGA4,GRK6,GSN,HEPH,IFT27,IL33,IL6ST,INHBA,IRS2,ITGA3,ITGB1,JAK2,KCNT1,LDLR,LSS,MLLT…	116
CELLULAR ASSEMBLY AND ORGANIZATION	ORGAMIZATIOM OF ORGAMELLE	4.131	7.40x10-5		0.555	ACTN1,ADNP,AGRN,AKAP2,ATP2A2,ATP7A,CD28,CD44,Cdc42,CFL1,CHMP2B,CHRNB1,CLASP1,COL4A3BP,CTDNEP1,CTNNA1,CXADR,CYP1B1,DBN1,DDR2,EIF4G1,FKBP1A,FLNA,GAK,GBF1,GSN,IFT27,INPPL1,ITGB1,ITPA,MBTPS1,MMP11,MTSS1,NEFH,PEX19,RAB5C,SAFB,SLAIN2,SMARCA2,SORT1,SPTBN1,SUV39H1,SYNE1,TGFB2,TMED9,TPR,Wasl,ZNF830	48
HEREDITARY DISORDER, ORGANISMAL INJURY AND ABNORMALITIES, SKELETAL AND MUSCULAR DISORDERS	HEREDITARY MYOPATHY	4.127	7.46x10-5		-1.067	ASAH1,ATP7A,CACNA2D1,CACNB2,CFL1,COL4A1,COL4A2,COL6A3,CSRP2,DAB2,DAG1,DYSF,FHL2,FXR1,GJA5,INPP5A,ITGB1,JAG1,KARS,MARS,MYOG,NBR1,NDUFS8,NEB,NEFH,NEXN,PABPN1,PDK3,PDK4,SCN1B,SDCBP,SMCHD1,SYNE1,TGFBI,TIMP3,TLN2,TMEM43,Tpm3,TTN,UBA1	40
CANCER, ORGANISMAL INJURY AND ABNORMALITIES	CAMCER OF CELLS	4.122	7.55x10-5		1.204	ABCA7,ABCC1,ACOT9,ACSS2,ADAM10,ADAM19,ADAR,AHI1,AJUBA,AKAP12,AKAP2,ANKRD17,ANKRD52,AP1B1,ARHGAP5,ASAH1,ATF5,ATP1B1,ATP2A2,ATP7A,AXL,BCL2L11,BSG,BTG1,C1QTNF2,C1R,C2CD2,C3orf70,C8orf44-SGK3/SGK3,CASC3,CBL,CBLB,CCND1,CCNL2,CD14,CD151,CD28,CD44,CD47,CD81,CD82,CDC42EP1,CDKN1A,CHERP,CLASP1,CLCN3,CLU,CNN2,COL4A1,COL4A2,COL4A3BP,COL6A3,COTL1,CSNK2A2,CSRP2,CSTF3,CXCL12,CXCL2,CYP1B1,CYP7A1,CYR61,DAAM1,DAB2…	233
CARDIOVASCULAR DISEASE, CELL DEATH AND SURVIVAL, ORGANISMAL INJURY AND ABNORMALITIES, SKELETAL AND MUSCULAR DISORDERS	CELL DEATH OF CARDIOMYOCYTES	4.119	7.61x10-5		0.956	ATG16L1,BCL2L11,CACNB2,CBL,CDKN1A,CXADR,CYR61,FASN,FSTL1,GSN,IL33,IL6ST,INHBA,RTN4,SERPINF1,SOCS3,SPP1,STAT1,STAT3,WISP1,XDH,Yap1,ZYX	23
CANCER, ORGANISMAL INJURY AND ABNORMALITIES, RESPIRATORY DISEASE	MOM-SMALL CELL LUMG CAMCER	4.111	7.75x10-5		-0.896	ACTN1,ADAM19,AGO1,AGRN,AJUBA,ARHGAP5,ASAH1,ATP1B1,AXL,BCL2L11,CACNA2D1,CBL,CCNB1,CCND1,CD44,CDKN1A,CFH,CLCN3,CYP1B1,DDR2,DIXDC1,DYSF,EIF4G1,EPHB4,ERRFI1,ETS2,FASN,FDFT1,FDPS,FKBP1A,FXR1,GPC6,GSN,IFRD1,IL6ST,INHBA,INPP5A,INSIG1,ITGA3,ITGB1,JAK2,KARS,KDM5A,KLF3,KRT7,LPP,MARK2,MMP14,MRVI1,MXI1,NBN,NCDN,NEB,NF2,NID1,NOTCH2,NSD3,PBRM1,PCCA,PDCD4,PDK4,PJA2,PPM1L,PPP6C,PRKCA,PXN,RALA,RASA1,RC3H2,SELENOK…	97
CELL-TO-CELL SIGNALING AND INTERACTION, CELLULAR ASSEMBLY AND ORGANIZATION	CELL-CELL ADHESIOM	4.107	7.81x10-5		-0.404	ADAM10,ADGRL1,CD151,CD44,Cdc42,CXADR,CXCL12,CYR61,DAB2,ITGA6,ITGB1,JAK2,LGALS3,NF2,RND3,SHC1,SOX9,SRPX2,TIMP3,VCAM1,ZEB1,ZYX	22
CARDIOVASCULAR DISEASE, ORGANISMAL INJURY AND ABNORMALITIES	OCCLUSIOM OF ARTERY	4.104	7.87x10-5		1.016	AGPAT5,ATP2A2,CA5B,CACNA2D1,CACNB2,CBLB,CD14,CD44,CD47,CDCP1,CDKN1A,CLU,CXCL12,CXCL2,EIF4H,ETNK1,FADS1,FKBP1A,HMGCR,IL33,KLF6,LDLR,LGALS3,MMP11,MMP14,OGDH,PLA2G2A,PLXNA2,RTN4,SCD,SCN1B,SERPINA3,SERPINE1,SHC1,SOCS3,SORT1,SOX4,SPP1,STAT3,TGFB2,TIMP3,TNFRSF11B,TUBA8,VCAM1,VEPH1,XDH	46
CANCER, ORGANISMAL INJURY AND ABNORMALITIES	IMCIDEMCE OF TUMOR	4.101	7.92x10-5		-1.657	AHRR,ATP2A2,CCND1,CD151,CD44,CD47,CDKN1A,CYP1B1,ERRFI1,FOXO4,HMMR,IFNAR1,IL6ST,KDM5A,KLF6,LGALS3,MMP11,MXI1,NBN,NF2,PDCD4,PRKCA,RAE1,S100A4,SMARCA2,SMARCA4,SPP1,SPTBN1,STAT1,TGFBI,ZEB1	31
FREE RADICAL SCAVENGING	METABOLISM OF REACTIVE OXYGEM SPECIES	4.096	8.02x10-5		-0.678	ABCC1,ATG16L1,ATP7A,CD14,CD28,CD44,CD47,CDKN1A,CFH,CLCN3,CXCL12,CXCL2,CYP1B1,CYR61,DUSP1,FTH1,GSN,Gsta4,HEPH,ITGA6,ITGB1,JAK2,LGALS3,MMP14,OGDH,PRKCA,PXDN,RND3,RORA,RTN4,SERPINA3,SERPINA4,SERPINF1,SHC1,SLC25A38,SOCS3,SPP1,STAT3,TNFRSF11B,TRAF6,UCP2,VCAM1,XDH,ZC3H12A	44
NEUROLOGICAL DISEASE, ORGANISMAL INJURY AND ABNORMALITIES, PSYCHOLOGICAL DISORDERS	DISORDER OF BASAL GAMGLIA	4.094	8.05x10-5			ADAR,AP1S1,APOD,ARMCX3,ATP1B1,ATP2A2,CD44,Cdc42,CHRM4,CIRBP,CLU,CSRP2,CYP51A1,DHCR7,DNAJB12,DPYSL3,DYNLT1,EIF3E,EIF4G1,EPHB4,ETFB,FDFT1,FTH1,GAK,GYPC,HIGD1A,HMGCR,HSPA1A/HSPA1B,ID3,ISG15,KDM5A,KLF3,LDLR,MBTPS1,NDUFB2,NOTCH2,PKIA,PRKX,PSAT1,Ptprv,RERE,RTN4,SCD,Scd2,SCN1B,SERPINA3,SGK1,SLC18A3,SLC1A3,SMAD6,SMTN,SORT1,SOX9,SPP1,STARD10,STRN3,SUB1,TCERG1,TMEFF1,TNNC2,TRAF6,TRAM1,TSN,TUBA8	64
CELL MORPHOLOGY, CONNECTIVE TISSUE DEVELOPMENT AND FUNCTION, SKELETAL AND MUSCULAR SYSTEM DEVELOPMENT AND FUNCTION, TISSUE DEVELOPMENT, TISSUE MORPHOLOGY	MORPHOLOGY OF OSTEOCLASTS	4.091	8.11x10-5			CD44,IFNAR1,IL6ST,LDLR,PDK4,SBNO2,SLC4A2,TNFRSF11B,TRAF6	9
CELL-TO-CELL SIGNALING AND INTERACTION	ADHESIOM OF LEUKEMIA CELL LIMES	4.088	8.17x10-5		-0.077	ADAM10,CD28,CD44,CD47,CXCL12,DAB2,DYSF,FLNA,ITGA3,ITGA6,ITGB1,SPP1,VCAM1	13
CANCER, DERMATOLOGICAL DISEASES AND CONDITIONS, ORGANISMAL INJURY AND ABNORMALITIES	PAPILLOMA	4.075	8.41x10-5		-1.969	ATP2A2,CCND1,CDKN1A,CLU,ERRFI1,Gsta4,IGFBP5,MYLPF,PDCD4,PLXNB2,PRKCA,Ptprv,SCD,SPP1,STAT3,TNNC2	16
CANCER, HEMATOLOGICAL DISEASE, IMMUNOLOGICAL DISEASE, ORGANISMAL INJURY AND ABNORMALITIES	LYMPH MODE CAMCER	4.065	8.61x10-5			CCND1,CD44,CXCL12,FKBP1A,HELB,HMMR,IFNAR1,ITGB1,JAK2,SERPINE1,SF3B1,SPP1,STAT6,TUBA8	14
EMBRYONIC DEVELOPMENT, ORGAN DEVELOPMENT, ORGAN MORPHOLOGY, ORGANISMAL DEVELOPMENT, ORGANISMAL INJURY AND ABNORMALITIES, RESPIRATORY DISEASE, RESPIRATORY SYSTEM DEVELOPMENT AND FUNCTION, TISSUE DEVELOPMENT	ABMORMAL MORPHOLOGY OF BROMCHIOLE	4.065	8.61x10-5			CBY1,CDKN1A,FSTL1,MMP14,TIMP3	5
DEVELOPMENTAL DISORDER, HEREDITARY DISORDER, ORGANISMAL INJURY AND ABNORMALITIES, SKELETAL AND MUSCULAR DISORDERS	DYSTROPHY OF MUSCLE	4.063	8.64x10-5		-1.067	CFL1,COL4A1,COL4A2,COL6A3,CSRP2,DAB2,DAG1,DYSF,FXR1,INPP5A,ITGB1,JAG1,MYOG,PABPN1,PDK4,SDCBP,SMCHD1,SYNE1,TGFBI,TIMP3,TLN2,TMEM43,Tpm3,TTN	24
CELL-TO-CELL SIGNALING AND INTERACTION, CELLULAR ASSEMBLY AND ORGANIZATION, HEMATOLOGICAL SYSTEM DEVELOPMENT AND FUNCTION, IMMUNE CELL TRAFFICKING, INFECTIOUS DISEASES	FUSIOM OF LEUKOCYTES	4.059	8.73x10-5		1.069	CD44,CD47,CD81,CXCL12,STAT1,STAT6,TNFRSF11B	7
CELLULAR MOVEMENT	CELL MOVEMEMT OF MELAMOMA CELLS	4.059	8.73x10-5		0.239	ADAM10,CD47,CD82,GSN,IRS2,VCAM1,ZEB1	7
CANCER, GASTROINTESTINAL DISEASE, ORGANISMAL INJURY AND ABNORMALITIES	GASTROIMTESTIMAL ADEMOCARCIMOMA	4.049	8.94x10-5			ABCC1,ABHD4,ACBD3,ACOT9,ACSS2,ADAM19,ADAR,ADNP,AGAP3,AGPAT5,AGRN,AHI1,AHRR,AKAP12,AKAP2,ALDH1L2,ANK1,ANKHD1/ANKHD1-EIF4EBP3,ANKRD52,AOX1,AP1S1,ARHGAP11A,ARHGAP44,ARHGAP5,ART3,ASAH1,ATG16L1,ATG3,ATP7A,AXL,BCL2L11,C11orf54,C14orf1,C1QTNF2,C1R,C2CD2,C6orf89,C8orf44-SGK3/SGK3,CACNA2D1,CACUL1,CASC3,CBLB,CBX6,CBY1,CCND1,CCND2,CCPG1,CCSER2,CD44,CD82,CDC42EP1,CDCP1,CFH,CHST2,CIC,CLCN3,CLU,CMIP,COL4A2,COL…	308
CANCER, CELLULAR DEVELOPMENT, CELLULAR GROWTH AND PROLIFERATION, ORGANISMAL INJURY AND ABNORMALITIES, TUMOR MORPHOLOGY	PROLIFERATIOM OF CAMCER CELLS	4.048	8.95x10-5		0.101	ADAM10,BSG,C8orf44-SGK3/SGK3,CCND1,CD151,CD44,CXCL12,CYR61,DUS2,DUSP1,EIF4EBP1,FASN,FHL2,GAS6,HMGCR,HMMR,ID2,ID3,INHBA,JAG1,LGALS3,NF2,NR2F2,PRKCA,PXN,SOCS3,SPP1,STAT1,STAT3,TGFB2,TRIM25,TXLNA,ULK1,YES1	34
CANCER, ORGANISMAL INJURY AND ABNORMALITIES, RESPIRATORY DISEASE	CARCIMOMA IM LUMG	4.045	9.01x10-5		0.076	ACTN1,ADAM19,AGO1,AGRN,AJUBA,ARHGAP5,ASAH1,ATP1B1,AXL,BCL2L11,CACNA2D1,CBL,CCNB1,CCND1,CD44,CDKN1A,CFH,CLCN3,CYP1B1,DDR2,DIXDC1,DUS2,DYSF,EIF3E,EIF4G1,EPHB4,ERRFI1,ETS2,FASN,FDFT1,FDPS,FKBP1A,FXR1,GPC6,GRK6,GSN,IFRD1,IL6ST,INHBA,INPP5A,INSIG1,ITGA3,ITGB1,JAK2,KARS,KDM5A,KLF3,KRT7,LPP,MARK2,MMP14,MRVI1,MXI1,NBN,NCDN,NEB,NF2,NID1,NOTCH2,NSD3,PBRM1,PCCA,PDCD4,PDK4,PJA2,PPM1L,PPP6C,PRKCA,PXN,RALA,RAS…	102
CELLULAR DEVELOPMENT, CELLULAR GROWTH AND PROLIFERATION, EMBRYONIC DEVELOPMENT, ORGANISMAL DEVELOPMENT	PROLIFERATIOM OF EMBRYOMIC CELLS	4.04	9.11x10-5		1.321	AGO1,ARHGAP5,CD44,CDKN1A,CTNNA1,CXCL12,ID3,IL6ST,IRS2,ITGA6,JAG1,KDM5B,NFIC,PLXNB2,PRRX1,PRRX2,PTPMT1,S100A4,SERPINF1,SOCS3,SOX9,STAT1,STAT3,TNKS2,ZEB1	25
CANCER, ORGANISMAL INJURY AND ABNORMALITIES, TUMOR MORPHOLOGY	IMVASIOM OF TUMOR	4.04	9.13x10-5		-1.278	BSG,CD14,CD151,CD44,CD82,CLU,CSNK2A2,CXCL12,FASN,FKBP1A,FLNA,IGFBP5,ITGA6,ITGB1,MMP14,NOTCH2,PDCD4,PXN,RALBP1,SDC1,SERPINE1,SPP1,STAT3,ZEB1	24
CARDIOVASCULAR DISEASE, ORGANISMAL INJURY AND ABNORMALITIES	BLOOD VESSEL DEFECT	4.034	9.25x10-5			ADGRL1,AGRN,CACNB2,CLU,COL4A1,CXCL12,DBN1,DDX6,FKBP1A,IGFBP5,JAG1,NRP2,PBRM1,S100A4,SERPINE2,STAT3,VCAM1	17
# Molecules：The number of differential genes contained in the disease or function categories
